# Supplementary material
Source: publisher figshare collection journal article supplement (https://acs.figshare.com/ndownloader/files/20227518)

# Supporting Information

## **Palladium-Catalyzed                      Three-Component                      Tandem Coupling-Carboannulation Reaction Leading to Polysubstituted [60]Fullerene-Fused Cyclopentanes**

Qingfeng Liu, Tong-Xin Liu,\* Jinliang Ma, and Guisheng Zhang\*

*Collaborative Innovation Center of Henan Province for Green Manufacturing of Fine Chemicals,  
Key Laboratory of Green Chemical Media and Reactions, Ministry of Education, Henan Key  
Laboratory of Organic Functional Molecule and Drug Innovation, School of Chemistry and  
Chemical Engineering, Henan Normal University, Xinxiang, Henan 453007, China.*

*E-mail: liutongxin\_0912@126.com and zgs6668@yahoo.com*

### **Table of Contents**

|                                                                                          |         |
|------------------------------------------------------------------------------------------|---------|
| 1. General Information                                                                   | S2      |
| 2. Experimental Procedures                                                               | S3–S4   |
| 3. UV–vis Spectra of Representative Compounds                                            | S5–S13  |
| 4. CVs of Selected Compounds                                                             | S14–S17 |
| 5. Synthesis and Spectral Data for Compounds <b>4</b> and <b>6</b>                       | S18–S33 |
| 6. <sup>1</sup> H NMR and <sup>13</sup> C NMR Spectra of Compounds <b>4</b> and <b>6</b> | S34–S69 |

## 1. General Information

Unless otherwise specified, all reagents were purchased as reagent grade and used without further purification. Pd(PPh<sub>3</sub>)<sub>4</sub> and (hetero)aryliodides were purchased from Innochem. Rb<sub>2</sub>CO<sub>3</sub> was purchased from Energy Chemical. 2-(buta-2,3-dien-1-yl)malonates **2a**,<sup>1</sup> **2b**,<sup>1</sup> **2c**,<sup>2</sup> **2d**,<sup>3</sup> **2e**,<sup>1b,4</sup> **2f**,<sup>1b</sup> and aryliodide **3o**<sup>5</sup> was prepared by following the literature procedure. 1,2-Dichlorobenzene (ODCB) were treated with CaH<sub>2</sub>. <sup>1</sup>H NMR (400 and 600 MHz) and <sup>13</sup>C NMR (100 and 150 MHz) were registered on Bruker 400 and 600 M spectrometers with tetramethylsilane (TMS) as internal standard. UV–vis Spectra were recorded on Shimadzu UV-1700. CVs were recorded on CHI660E. FT-IR was registered on Thermo Nicolet NEXUS 670 FTIR. HRMS were measured on Bruker Ultraflexextreme MALDI-TOF/TOF using *E*-2-[3-(4-*tert*-butylphenyl)-2-methyl-2-propenylidene]malononitrile (DCTB) as a matrix.

### References:

- (1) (a) Naidu, V. R.; Posevins, D.; Volla, C. M. R.; Bäckvall, J.-E. *Angew. Chem. Int. Ed.* **2017**, *56*, 1590. (b) Tsukamoto, H.; Ito, K.; Doi, T. *Chem. Commun.* **2018**, *54*, 5102.
- (2) C érat, P.; Gritsch, P. J.; Goudreau, S. R.; Charette, A. B. *Org. Lett.* **2016**, *18*, 1410.
- (3) Meguro, M.; Yamamoto, Y. *J. Org. Chem.* **1999**, *64*, 694.
- (4) Ahmar, M.; Cazes, B.; Gore, J. *Tetrahedron*, **1987**, *43*, 3453.
- (5) Deng, R.; Huang, Y.; Ma, X.; Li, G.; Zhu, R.; Wang, B.; Kang, Y.-B.; Zhenhua Gu, Z. *J. Am. Chem. Soc.* **2014**, *136*, 4472.

## 2. Experimental Procedures

*General Procedure for the Synthesis of Products 4:* A dry 15-mL tube equipped with a magnetic stirrer was charged with C<sub>60</sub> (36.0 mg, 0.05 mmol), **2a** (0.1 mmol), **3a** (0.1 mmol), Pd(PPh<sub>3</sub>)<sub>4</sub> (5.8 mg, 0.005 mmol). After dissolving the solids in anhydrous ODCB (4 mL) and MeCN (1 mL) by sonication, the sealed tube was stirred in an oil bath preset at a designated temperature for a desired time (monitored by TLC) in air. The reaction mixture was filtered through a silica gel plug to remove any insoluble material. After the solvent had been evaporated under vacuum, the residue was separated on a silica gel column with CS<sub>2</sub> as the eluent to recover unreacted C<sub>60</sub>, and then the eluent was switched to CS<sub>2</sub>/DCM to give product **4**.

*Typical Procedure for the Synthesis of Product 4aa from Pd(PPh<sub>3</sub>)<sub>4</sub>-catalyzed Reaction of C<sub>60</sub> with Substrates 2a and 3a at a minimum 1 mmol scale:* A dry 200-mL tube equipped with a magnetic stirrer was charged with C<sub>60</sub> (720.0 mg, 1.0 mmol), **2a** (0.368 g, 2.0 mmol) and **3a** (0.408 g, 2.0 mmol) and Pd(PPh<sub>3</sub>)<sub>4</sub> (0.116 g, 0.10 mmol). After dissolving the solids in anhydrous ODCB (80 mL) and MeCN (20 mL) by sonication, the sealed tube was stirred in an oil bath at 100 °C for 4 h in air. The reaction mixture was filtered through a silica gel plug to remove any insoluble material. After the solvent had been evaporated under vacuum, the residue was separated on a silica gel column with CS<sub>2</sub> as the eluent to recover unreacted C<sub>60</sub> (0.360 g), and then the eluent was switched to CS<sub>2</sub>/DCM (v/v = 8:1) to give product **4aa**: (0.303 g, 31%).

*Transformations of C<sub>60</sub>-Fused Cyclopentane 4aa:* A 50-mL tube equipped with a magnetic stirrer was charged with **4aa** (49.0 mg, 0.05 mmol) and NaOH (20.0 mg, 0.50 mmol). After dissolving the solids in CB (16 mL) and MeOH (4 mL) by sonication, the sealed tube was stirred in an oil bath at 80 °C for 18 h in air, and then

acidified with 0.4 mL of acetic acid. The reaction mixture was filtered through a silica gel plug to remove any insoluble material. After the solvent had been evaporated under vacuum, the residue was separated on a silica gel column with CS<sub>2</sub>/DCM/EtOAc (v/v/v = 10:5:2) as the eluent to give product **6** (30.0 mg, 66%).

*Procedures for UV-Vis Spectra Recording:* A dry 100-mL volumetric flask was charged with the product **4** ( $1.4\times 10^{-3}\sim 1.6\times 10^{-3}$  mmol). After dissolving the solid with 100 mL of CHCl<sub>3</sub> by sonication, a small amount of sample solution is added to a cuvette and then placed in the UV-vis spectrophotometer to record the UV-vis spectrum of product **4**.

*Procedures for Electrochemical Characterization Recording:* In dry 15-mL electrolytic cup,  $2.0\times 10^{-3}$  mmol of product **4**, 2 mL of the solution of (*n*-Bu)<sub>4</sub>NClO<sub>4</sub> in ODCB (0.1 M), and 18  $\mu$ L of the solution of ferrocene in ODCB (0.054 M) was added, respectively. After sonication, three different electrodes (reference electrode: SCE; working electrode: Pt; auxiliary electrode: Pt wire) were placed in the sample solution, then running electrochemical workstation recorded the cyclic voltammogram (CV) of product **4** under argon atmosphere.

### 3. UV-vis Spectra of Compounds

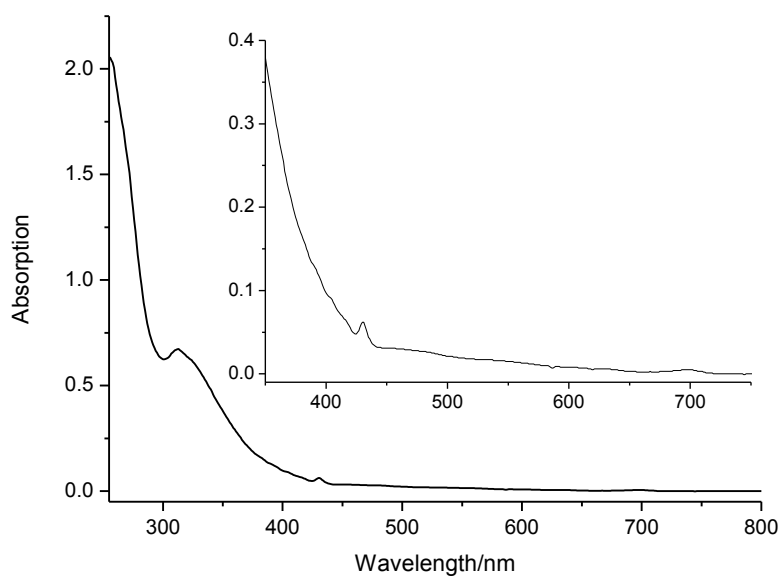

**Figure S1.** UV-vis spectrum of compound **4aa** in  $\text{CHCl}_3$

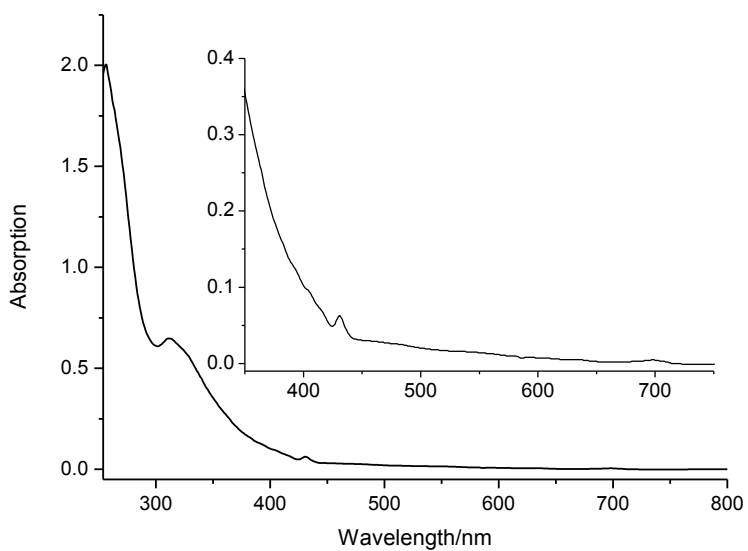

**Figure S2.** UV-vis spectrum of compound **4ab** in  $\text{CHCl}_3$

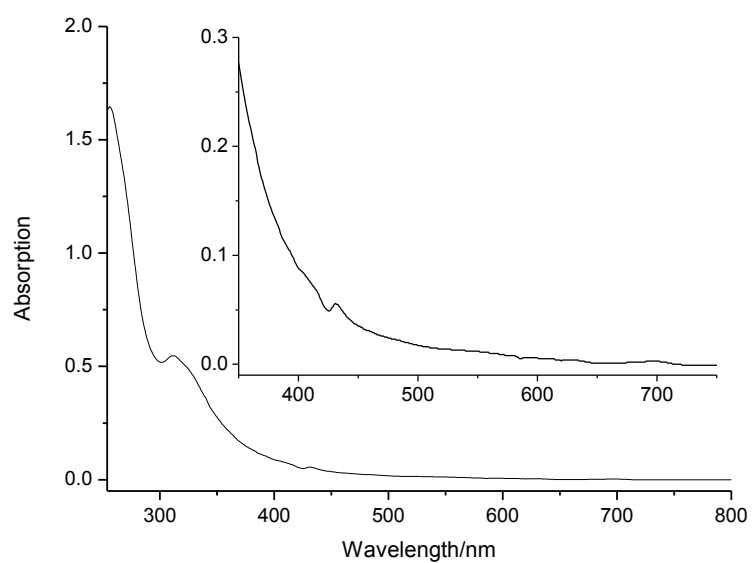

**Figure S3.** UV-vis spectrum of compound **4ac** in  $\text{CHCl}_3$

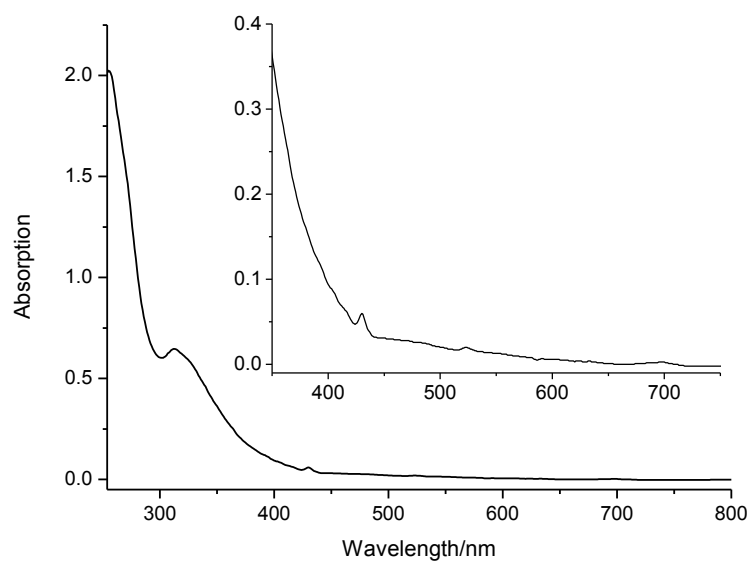

**Figure S4.** UV-vis spectrum of compound **4ad** in  $\text{CHCl}_3$

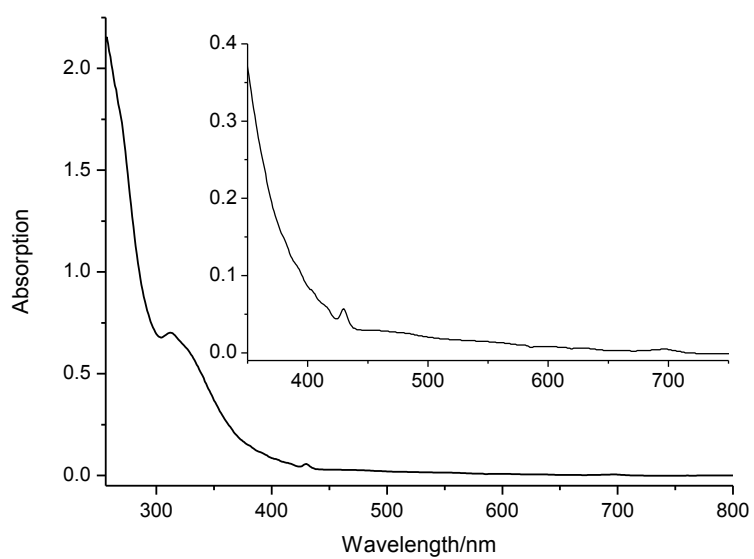

**Figure S5.** UV-vis spectrum of compound **4ae** in  $\text{CHCl}_3$

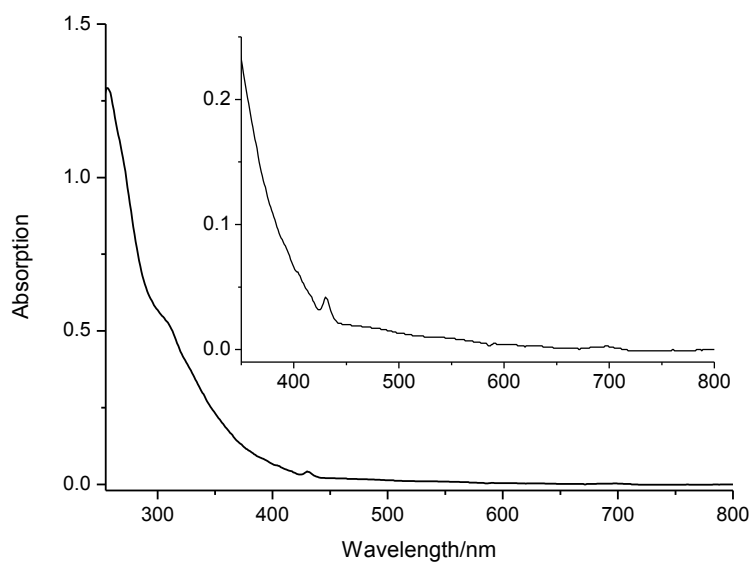

**Figure S6.** UV-vis spectrum of compound **4af** in  $\text{CHCl}_3$

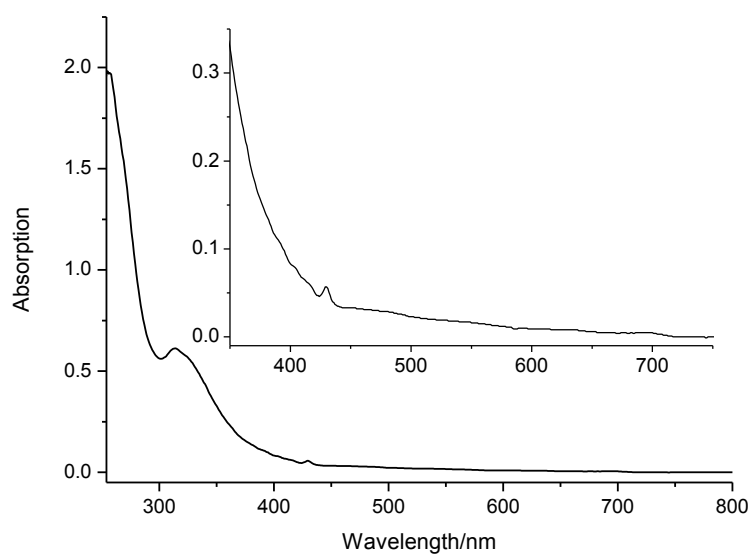

**Figure S7.** UV-vis spectrum of compound **4ag** in  $\text{CHCl}_3$

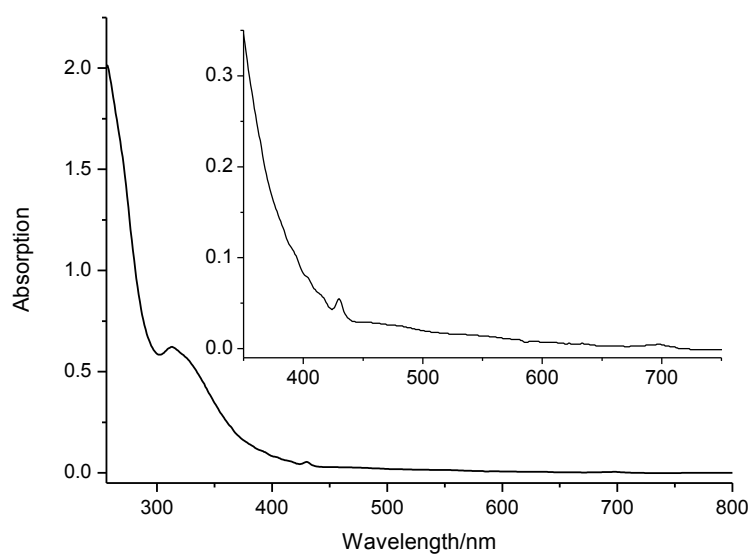

**Figure S8.** UV-vis spectrum of compound **4ah** in  $\text{CHCl}_3$



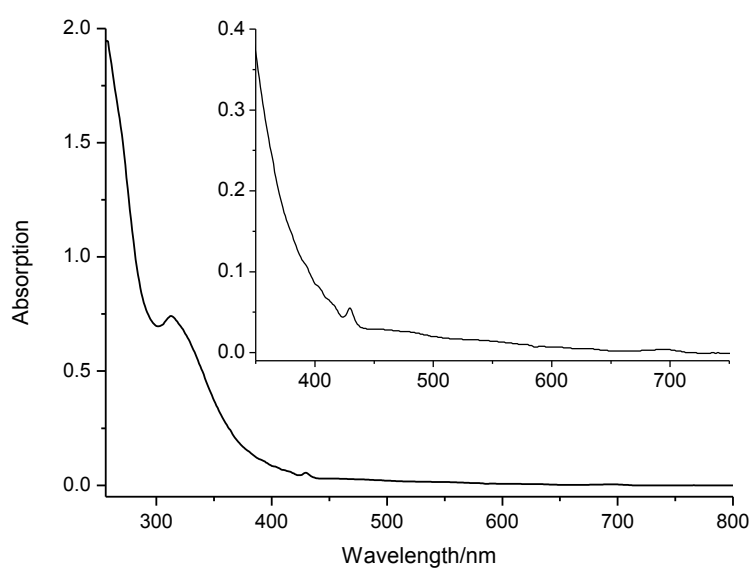

**Figure S9.** UV-vis spectrum of compound **4ai** in  $\text{CHCl}_3$

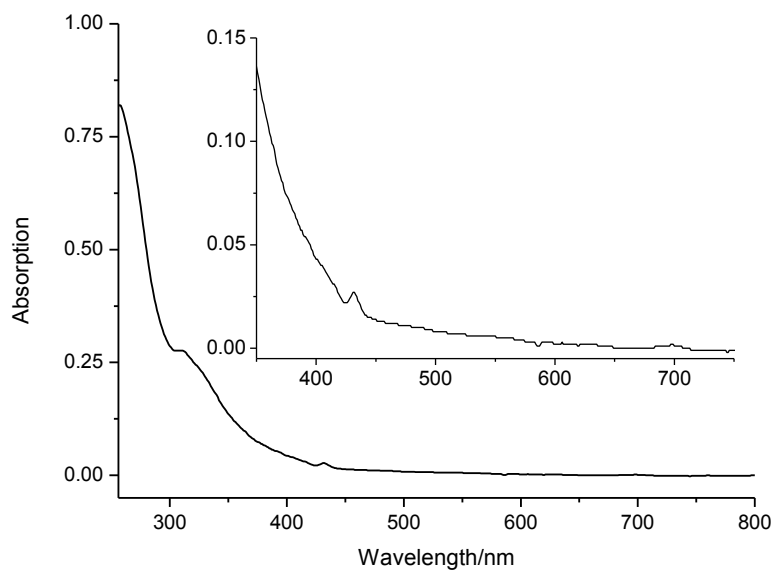

**Figure S10.** UV-vis spectrum of compound **4aj** in  $\text{CHCl}_3$

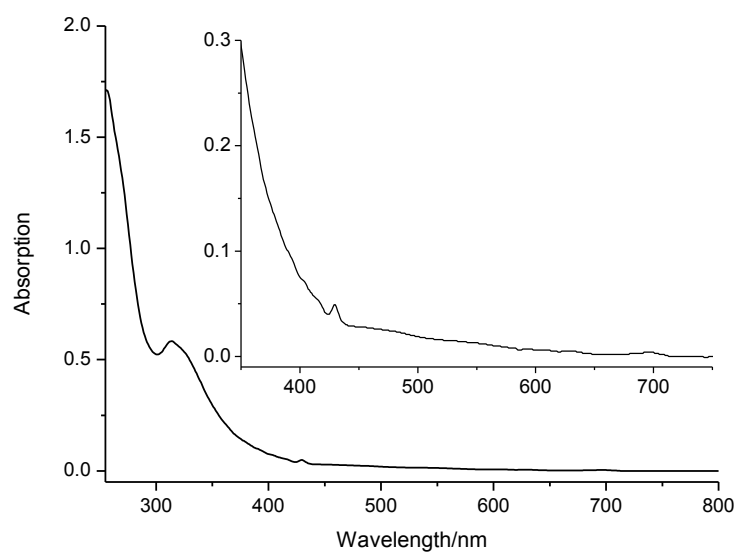

**Figure S11.** UV-vis spectrum of compound **4ak** in  $\text{CHCl}_3$

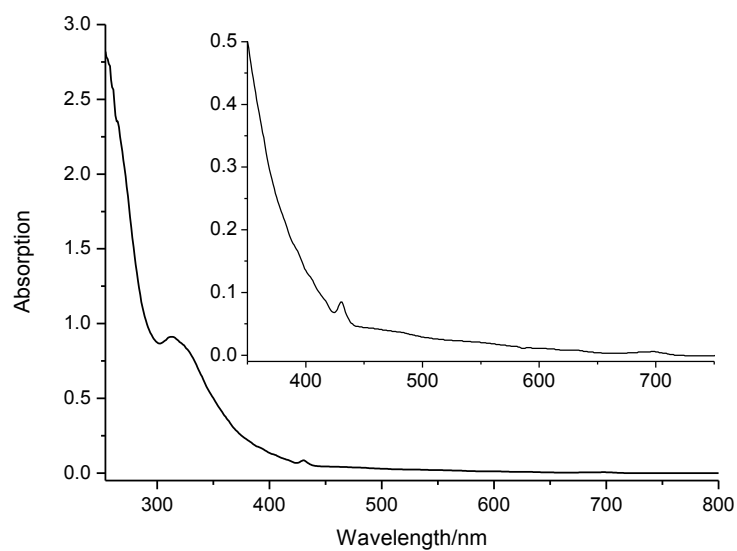

**Figure S12.** UV-vis spectrum of compound **4al** in  $\text{CHCl}_3$

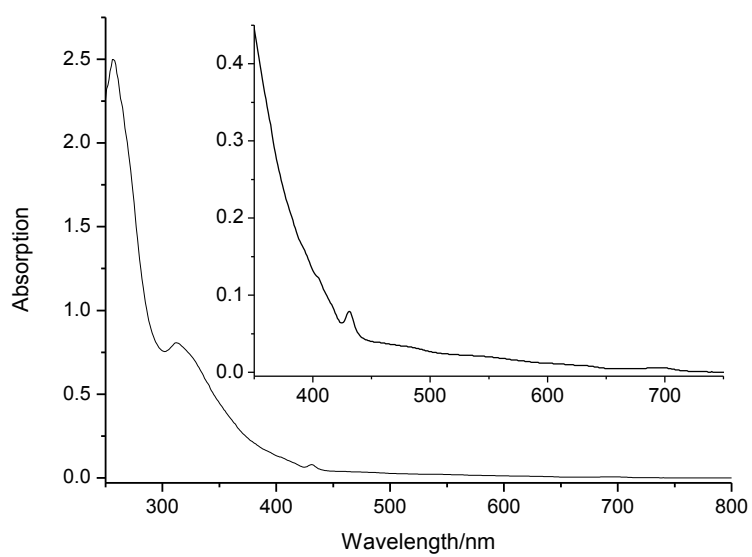

**Figure S13.** UV-vis spectrum of compound **4am** in  $\text{CHCl}_3$

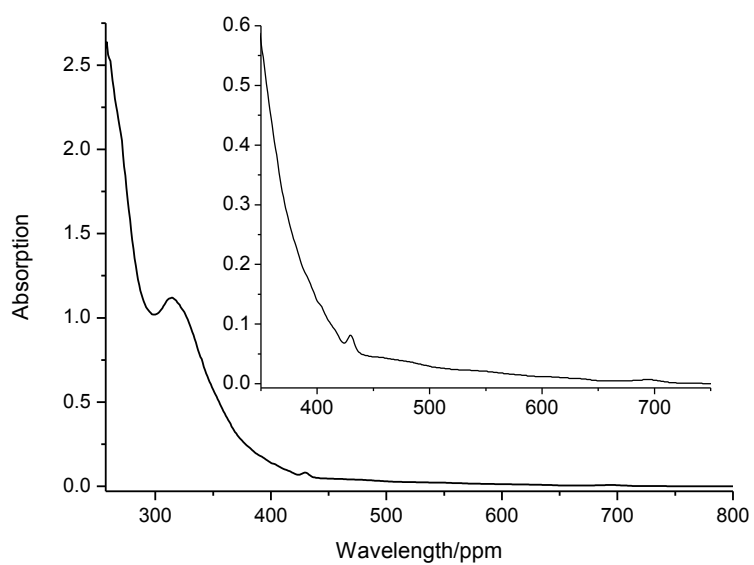

**Figure S14.** UV-vis spectrum of compound **4an** in  $\text{CHCl}_3$

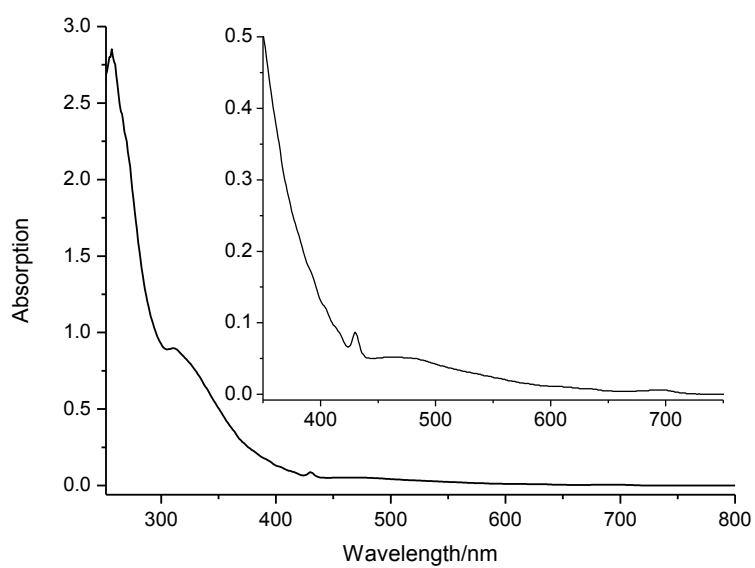

**Figure S15.** UV-vis spectrum of compound **4ao** in  $\text{CHCl}_3$

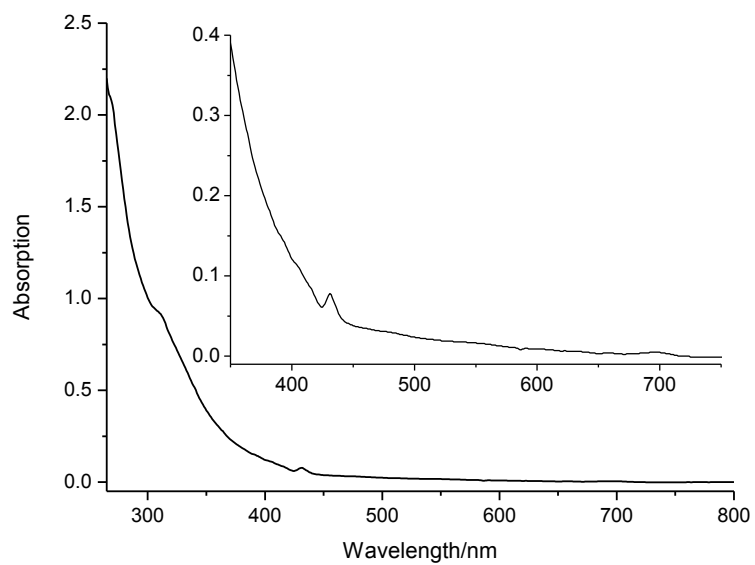

**Figure S16.** UV-vis spectrum of compound **4ap** in  $\text{CHCl}_3$

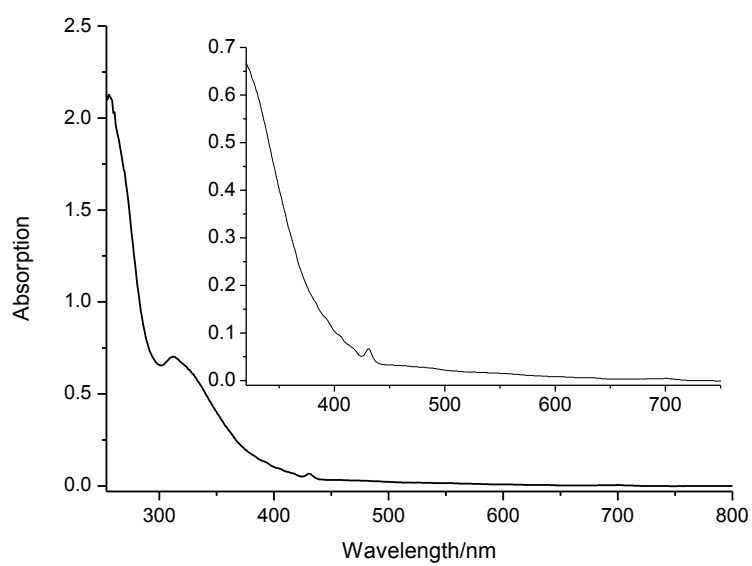

**Figure S17.** UV-vis spectrum of compound **4ba** in  $\text{CHCl}_3$

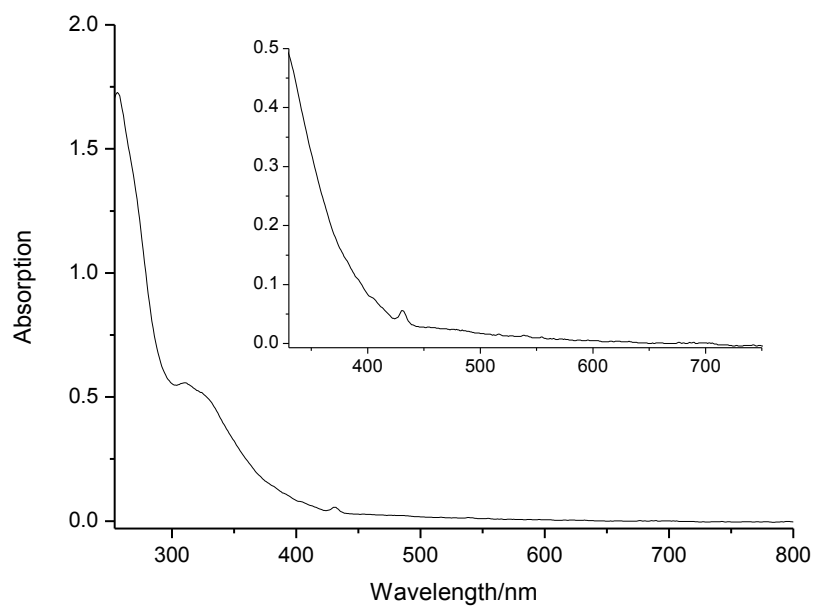

**Figure S18.** UV-vis spectrum of compound **6** in  $\text{CHCl}_3$

## 4. CVs of Selected Compounds

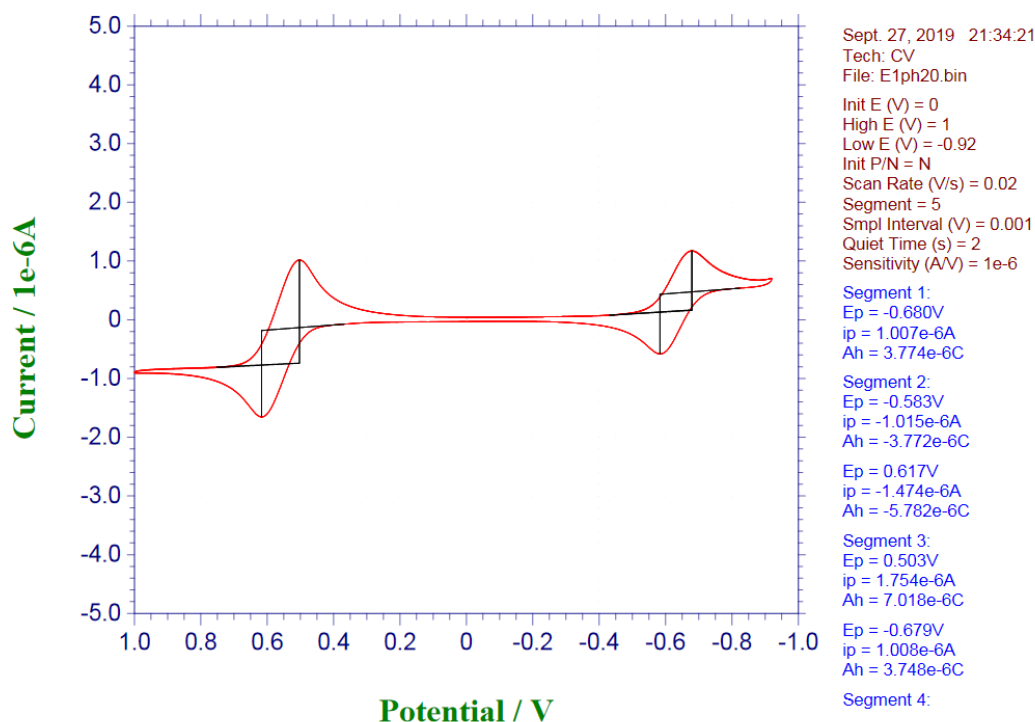

Cyclic voltammogram of compound **4aa** (scanning rate: 20 mV s<sup>-1</sup>)

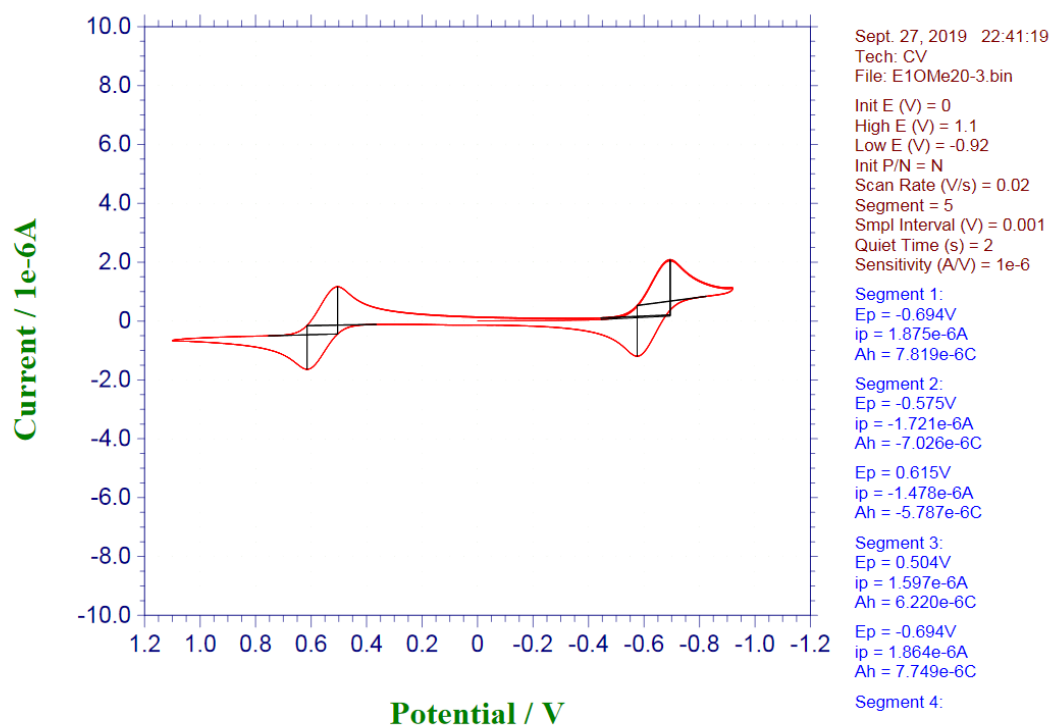

Cyclic voltammogram of compound **4ac** (scanning rate: 20 mV s<sup>-1</sup>)

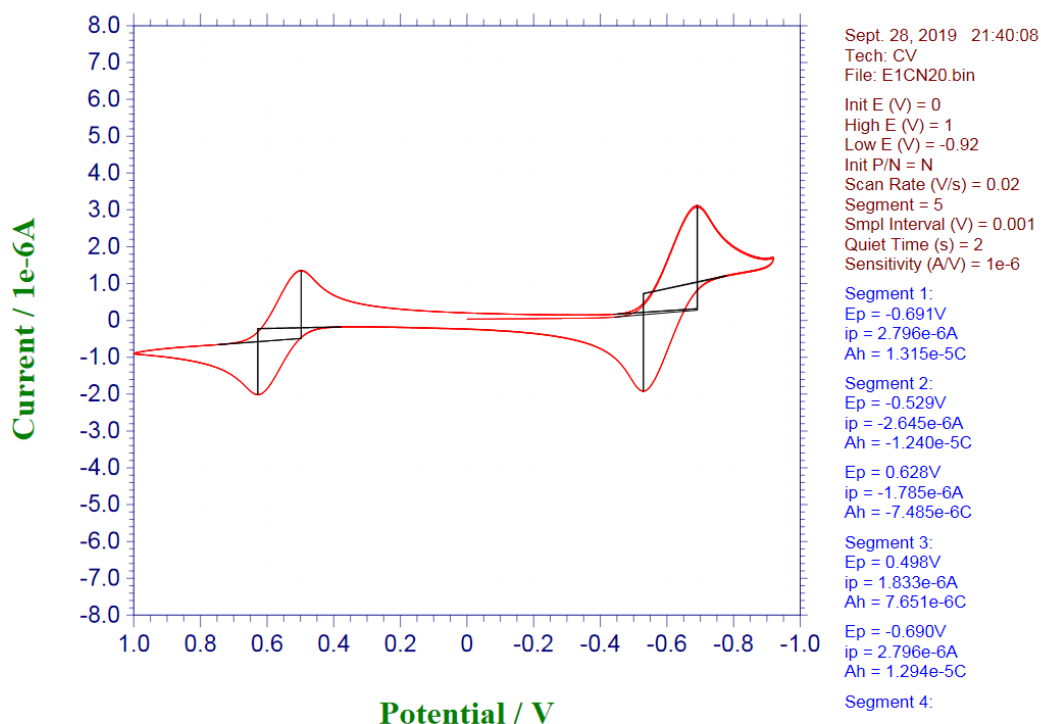

Cyclic voltammogram of compound **4ag** (scanning rate: 20 mV s<sup>-1</sup>)

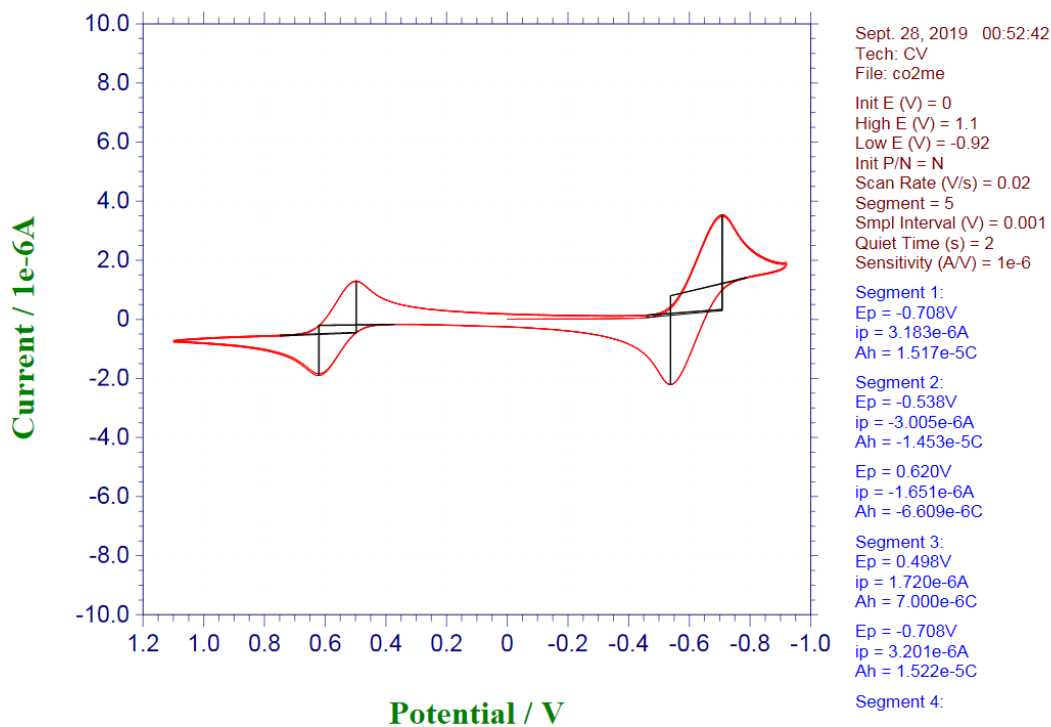

Cyclic voltammogram of compound **4ah** (scanning rate: 20 mV s<sup>-1</sup>)

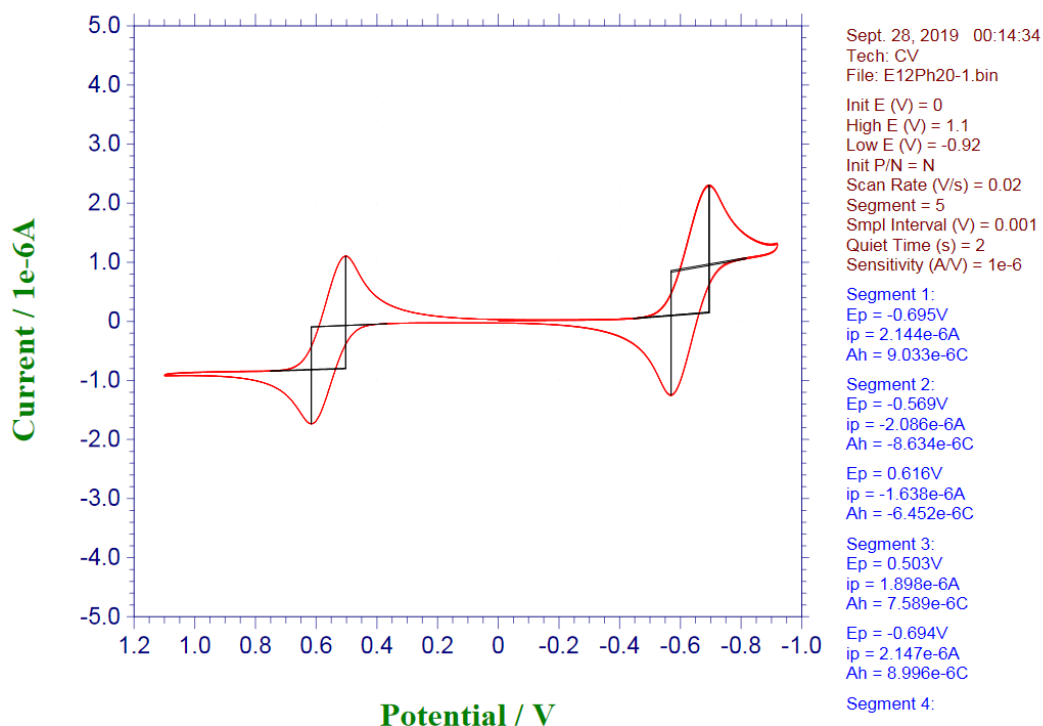

Cyclic voltammogram of compound **4aj** (scanning rate: 20 mV s<sup>-1</sup>)

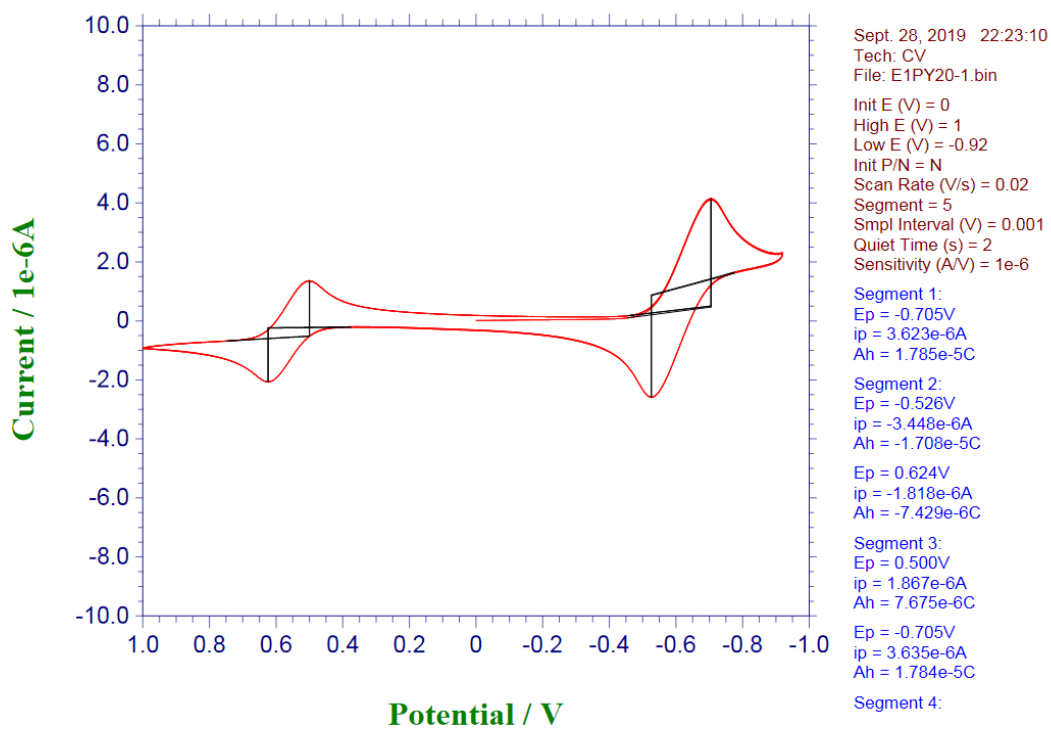

Cyclic voltammogram of compound **4ak** (scanning rate: 20 mV s<sup>-1</sup>)



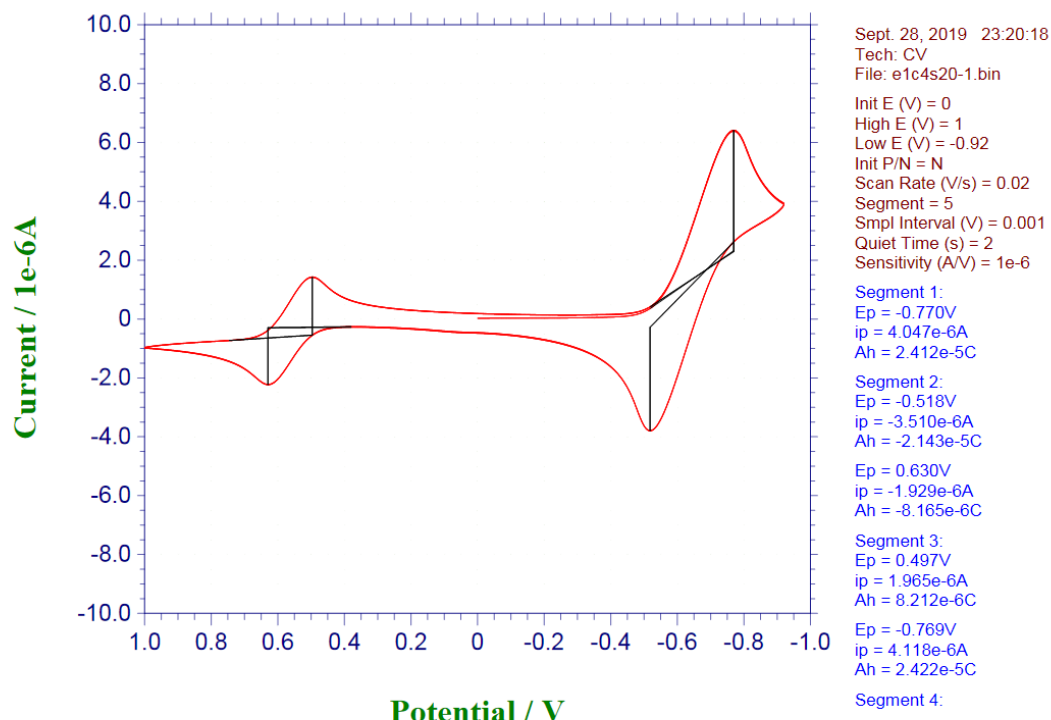

Cyclic voltammogram of compound **4am** (scanning rate: 20 mV s<sup>-1</sup>)

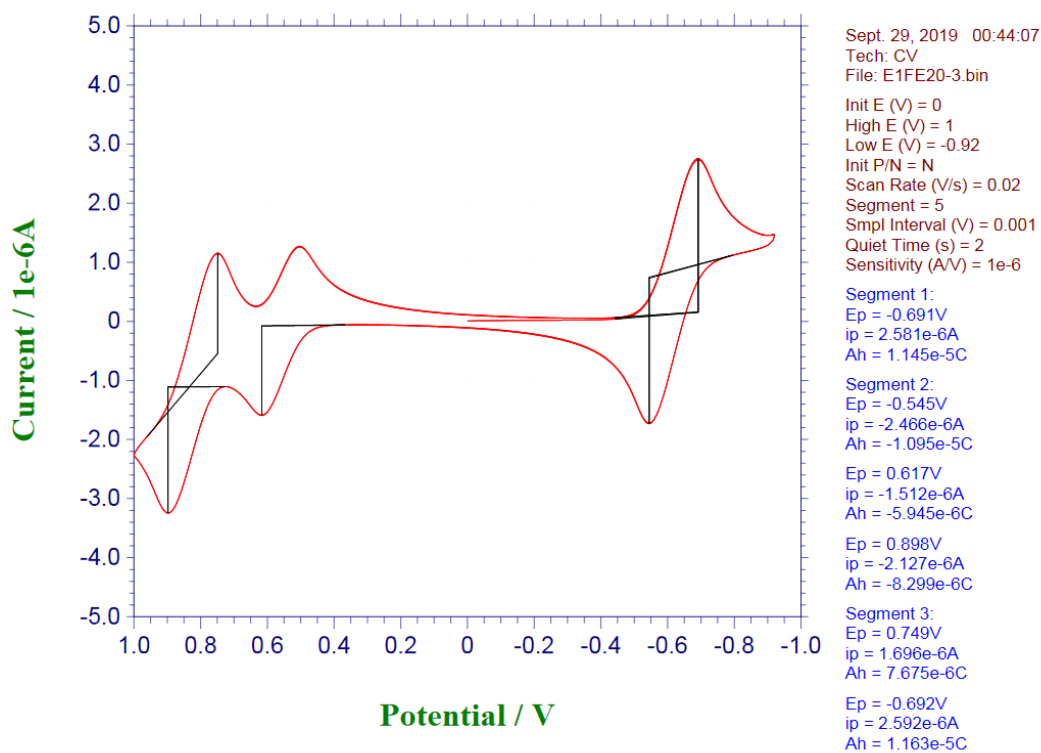

Cyclic voltammogram of compound **4ao** (scanning rate: 20 mV s<sup>-1</sup>)

## 5. Synthesis and Spectral Data for Compounds 4 and 6

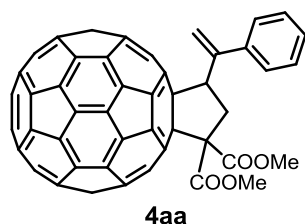

Compound **4aa**: the product mixture was separated and purified by silica gel column chromatography with CS<sub>2</sub> as the eluent to recover unreacted C<sub>60</sub>, and then the eluent was switched to CS<sub>2</sub>/DCM (v/v = 8:1) as the eluent to give **4aa** (16.7 mg, 34%), amorphous brown solid; <sup>1</sup>H NMR (600 MHz, CDCl<sub>3</sub>) δ 7.45–7.44 (m, 2H), 7.20–7.18 (m, 3H), 5.71 (s, 1H), 5.70 (s, 1H), 5.32 (dd, *J* = 14.4, 3.6 Hz, 1H), 4.16 (t, *J* = 14.4 Hz, 1H), 4.10 (s, 3H), 3.80 (s, 3H), 3.19 (dd, *J* = 13.2, 4.2 Hz, 1H); <sup>13</sup>C{<sup>1</sup>H} NMR (150 MHz, CDCl<sub>3</sub>/CS<sub>2</sub>) δ 171.1, 168.9, 154.7, 154.1, 152.1, 151.2, 147.3, 147.2, 146.9, 146.6, 146.5, 146.4, 146.39, 146.3, 146.2, 146.1, 146.0, 145.93, 145.91, 145.9, 145.8, 145.7, 145.6, 145.33, 145.3, 145.27, 145.24, 145.2, 145.1, 145.0, 144.7, 144.6, 144.5, 144.2, 143.1, 143.0, 142.7, 142.66, 142.5, 142.3, 142.2, 142.1, 141.9, 141.8, 141.7, 141.66, 141.53, 141.5, 141.2, 141.15, 141.1, 139.7, 138.9, 138.8, 138.7, 138.3, 137.0, 136.4, 134.7, 128.3, 128.2, 127.7, 117.3, 74.6, 74.0, 68.9, 53.6, 53.4, 52.9, 51.9, 37.6; FT-IR ν/cm<sup>-1</sup> (KBr) 2946, 1735, 1430, 1266, 1243, 1192, 1173, 1138, 1113, 1080, 903, 775, 697, 527; UV-vis (CHCl<sub>3</sub>) λ<sub>max</sub>/nm 255, 313, 430, 590, 633, 697; MALDI-TOF MS *m/z* calcd for C<sub>75</sub>H<sub>16</sub>O<sub>4</sub> [M]<sup>-</sup> 980.1054, found 980.1052.

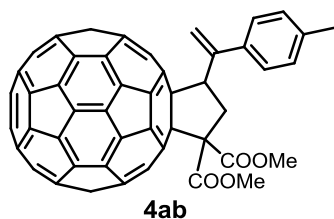

Compound **4ab**: the product mixture was separated and purified by silica gel column chromatography with CS<sub>2</sub> as the eluent to recover unreacted C<sub>60</sub>, and then the eluent was switched to CS<sub>2</sub>/DCM (v/v = 8:1) to give **4ab** (13.4 mg, 27%), amorphous brown solid; <sup>1</sup>H NMR (400 MHz, CDCl<sub>3</sub>) δ 7.35 (d, *J* = 8.4 Hz, 2H), 7.01 (d, *J* = 8.0 Hz, 2H), 5.69 (s, 1H), 5.66 (s, 1H), 5.31 (dd, *J* = 14.4, 3.6 Hz, 1H), 4.17 (t, *J* = 14.4 Hz, 1H), 4.10 (s, 3H), 3.81 (s, 3H), 3.21 (dd, *J* = 13.6, 4.0 Hz, 1H), 2.26 (s, 3H); <sup>13</sup>C{<sup>1</sup>H} NMR (150 MHz, CDCl<sub>3</sub>) δ 171.6, 169.4, 155.0, 154.4, 152.3, 151.4, 147.5, 147.4, 147.1, 146.9, 146.6, 146.5, 146.4, 146.3, 146.26, 146.2, 146.1, 146.08, 146.05, 146.0, 145.9, 145.89, 145.8, 145.7, 145.44, 145.42, 145.4, 145.38, 145.3, 145.2, 145.1, 144.8, 144.7, 144.6, 144.3, 143.2, 143.1, 142.9, 142.8, 142.76, 142.7, 142.5, 142.45, 142.3, 142.2, 142.1, 141.9, 141.8, 141.7, 141.3, 141.28, 139.7, 139.1, 138.9, 138.8, 138.4, 138.1, 137.1, 136.4, 134.7, 129.1, 127.7, 116.8, 74.8, 74.2, 69.1, 53.8, 53.3, 52.1, 37.7, 21.3; FT-IR ν/cm<sup>-1</sup> (KBr) 2946, 1739, 1430, 1262, 1189, 1170, 1137, 1078, 900, 821, 735, 526; UV-vis (CHCl<sub>3</sub>) λ<sub>max</sub>/nm 256, 312, 431, 590, 697; MALDI-TOF MS *m/z* calcd for C<sub>76</sub>H<sub>18</sub>O<sub>4</sub> [M]<sup>-</sup> 994.1211, found 994.1209.

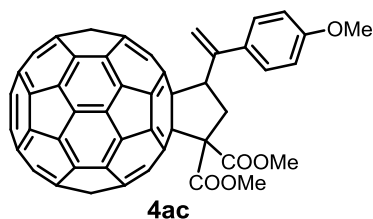

Compound **4ac**: the product mixture was separated and purified by silica gel column

chromatography with CS<sub>2</sub> as the eluent to recover unreacted C<sub>60</sub>, and then the eluent was switched to CS<sub>2</sub>/DCM (v/v = 6:1) to give **4ac** (9.9 mg, 20%), amorphous brown solid; <sup>1</sup>H NMR (400 MHz, CDCl<sub>3</sub>) δ 7.41–7.38 (m, 2H), 6.76–6.72 (m, 2H), 5.64 (s, 1H), 5.63 (s, 1H), 5.29 (dd, *J* = 14.4, 3.6 Hz, 1H), 4.17 (t, *J* = 14.0 Hz, 1H), 4.10 (s, 3H), 3.81 (s, 3H), 3.73 (s, 3H), 3.20 (dd, *J* = 13.6, 3.6 Hz, 1H); <sup>13</sup>C{<sup>1</sup>H} NMR (150 MHz, CDCl<sub>3</sub>) δ 171.6, 169.4, 159.7, 155.0, 154.4, 152.4, 151.4, 147.5, 147.4, 147.1, 146.9, 146.6, 146.5, 146.4, 146.35, 146.2, 146.15, 146.1, 146.05, 145.9, 145.86, 145.7, 145.5, 145.44, 145.4, 145.3, 145.25, 145.2, 144.9, 144.7, 144.6, 144.4, 143.2, 143.17, 142.9, 142.86, 142.8, 142.6, 142.5, 142.48, 142.4, 142.2, 142.1, 142.0, 141.84, 141.8, 141.7, 141.32, 141.3, 139.8, 139.1, 138.9, 138.8, 138.5, 137.1, 136.4, 134.8, 133.9, 129.0, 116.0, 113.8, 74.8, 74.2, 69.2, 55.5, 53.8, 53.3, 52.1, 37.7; FT-IR ν/cm<sup>-1</sup> (KBr) 2947, 2831, 1735, 1605, 1509, 1452, 1430, 1247, 1177, 1138, 1114, 1078, 1031, 904, 833, 730, 526; UV-vis (CHCl<sub>3</sub>) λ<sub>max</sub>/nm 256, 312, 431, 590, 697; MALDI-TOF MS *m/z* calcd for C<sub>76</sub>H<sub>18</sub>O<sub>5</sub> [M]<sup>-</sup> 1010.1160, found 1010.1156.

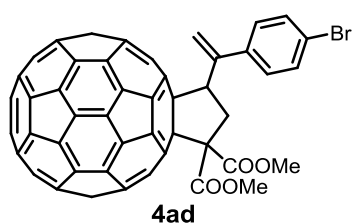

Compound **4ad**: the product mixture was separated and purified by silica gel column chromatography with CS<sub>2</sub> as the eluent to recover unreacted C<sub>60</sub>, and then the eluent was switched to CS<sub>2</sub>/DCM (v/v = 8:1) to give **4ad** (21.7 mg, 41%), amorphous brown solid; <sup>1</sup>H NMR (600 MHz, CDCl<sub>3</sub>) δ 7.34 (s, 4H), 5.73 (s, 1H), 5.71 (s, 1H), 5.27 (dd, *J* = 14.4, 3.6 Hz, 1H), 4.16 (t, *J* = 14.4 Hz, 1H), 4.10 (s, 3H), 3.81 (s, 3H), 3.20 (dd, *J*

= 13.2, 4.2 Hz, 1H);  $^{13}\text{C}\{^1\text{H}\}$  NMR (150 MHz,  $\text{CDCl}_3$ )  $\delta$  171.5, 169.3, 154.6, 154.1, 152.2, 151.2, 147.5, 147.4, 147.0, 146.7, 146.6, 146.56, 146.5, 146.4, 146.23, 146.2, 146.12, 146.1, 145.9, 145.88, 145.85, 145.8, 145.75, 145.7, 145.6, 145.5, 145.48, 145.47, 145.4, 145.3, 145.29, 145.28, 144.9, 144.7, 144.6, 144.4, 143.3, 143.2, 142.9, 142.9, 142.8, 142.6, 142.5, 142.3, 142.25, 142.1, 142.06, 141.84, 141.8, 141.7, 141.4, 141.3, 140.3, 139.7, 139.2, 139.1, 138.8, 138.6, 137.1, 136.7, 134.9, 131.5, 129.4, 122.3, 118.3, 74.8, 74.2, 69.2, 53.8, 53.3, 52.1, 37.6; FT-IR  $\nu/\text{cm}^{-1}$  (KBr) 2945, 1735, 1486, 1430, 1264, 1243, 1190, 1173, 1078, 1007, 907, 830, 764, 734, 575, 526; UV-vis ( $\text{CHCl}_3$ )  $\lambda_{\text{max}}/\text{nm}$  254, 312, 430, 590, 633, 697; MALDI-TOF MS  $m/z$  calcd for  $\text{C}_{75}\text{H}_{15}\text{BrO}_4$   $[\text{M}]^-$  1058.0159, found 1058.0155.

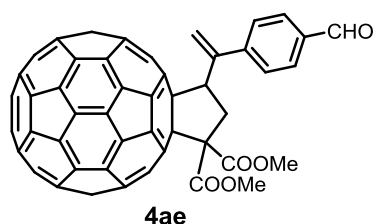

Compound **4ae**: the product mixture was separated and purified by silica gel column chromatography with  $\text{CS}_2$  as the eluent to recover unreacted  $\text{C}_{60}$ , and then the eluent was switched to  $\text{CS}_2/\text{DCM}$  (v/v = 8:1) to give **4ae** (31.2 mg, 62%), amorphous brown solid;  $^1\text{H}$  NMR (400 MHz,  $\text{CDCl}_3$ )  $\delta$  9.23 (s, 1H), 7.74 (d,  $J$  = 8.4 Hz, 2H), 7.65 (d,  $J$  = 8.4 Hz, 2H), 5.86 (s, 1H), 5.84 (s, 1H), 5.28 (dd,  $J$  = 14.4, 3.6 Hz, 1H), 4.19 (t,  $J$  = 14.0 Hz, 1H), 4.12 (s, 3H), 3.81 (s, 3H), 3.23 (d,  $J$  = 13.2, 4.0 Hz, 1H);  $^{13}\text{C}\{^1\text{H}\}$  NMR (150 MHz,  $\text{CDCl}_3$ )  $\delta$  191.8, 171.5, 169.3, 154.4, 153.9, 152.14, 151.1, 147.53, 147.5, 147.4, 146.9, 146.6, 146.56, 146.5, 146.4, 146.2, 146.18, 146.1, 145.9, 145.8, 145.7, 145.6, 145.5, 145.48, 145.46, 145.4, 145.36, 145.3, 145.2, 144.8, 144.6, 144.4, 143.3,

143.2, 142.9, 142.85, 142.7, 142.5, 142.4, 142.3, 142.26, 142.1, 142.0, 141.84, 141.8, 141.7, 141.4, 141.3, 139.6, 139.2, 139.1, 138.8, 138.6, 137.0, 136.7, 135.8, 135.0, 129.8, 128.4, 120.0, 74.8, 74.1, 69.1, 53.9, 53.4, 52.0, 37.6; FT-IR  $\nu/\text{cm}^{-1}$  (KBr) 2947, 2834, 2728, 1735, 1702, 1602, 1430, 1267, 1243, 1172, 1079, 909, 837, 730, 527; UV-vis ( $\text{CHCl}_3$ )  $\lambda_{\text{max}}/\text{nm}$  257, 312, 430, 590, 633, 697; MALDI-TOF MS  $m/z$  calcd for  $\text{C}_{76}\text{H}_{16}\text{O}_5$   $[\text{M}]^-$  1008.1003, found 1008.1001.

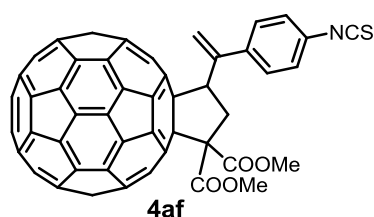

Compound **4af**: the product mixture was separated and purified by silica gel column chromatography with  $\text{CS}_2$  as the eluent to recover unreacted  $\text{C}_{60}$ , and then the eluent was switched to  $\text{CS}_2/\text{DCM}$  (v/v = 6:1) to give **4af** (17.6 mg, 34%), amorphous brown solid;  $^1\text{H}$  NMR (400 MHz,  $\text{CDCl}_3$ )  $\delta$  7.46 (d,  $J$  = 8.8 Hz, 2H), 7.07 (d,  $J$  = 8.4 Hz, 2H), 5.76 (s, 1H), 5.72 (s, 1H), 5.29 (dd,  $J$  = 14.4, 4.0 Hz, 1H), 4.17 (t,  $J$  = 14.0 Hz, 1H), 4.11 (s, 3H), 3.81 (s, 3H), 3.19 (dd,  $J$  = 13.6, 4.0 Hz, 1H);  $^{13}\text{C}\{^1\text{H}\}$  NMR (150 MHz,  $\text{CDCl}_3$ )  $\delta$  171.5, 169.3, 154.5, 154.0, 152.2, 151.2, 147.5, 147.4, 147.0, 146.6, 146.58, 146.56, 146.5, 146.4, 146.2, 146.19, 146.12, 146.1, 145.9, 145.85, 145.8, 145.7, 145.6, 145.5, 145.47, 145.43, 145.4, 145.3, 145.28, 144.8, 144.7, 144.6, 144.4, 143.3, 143.2, 142.93, 142.9, 142.85, 142.7, 142.5, 142.49, 142.3, 142.26, 142.1, 141.84, 141.8, 141.71, 141.7, 141.4, 141.3, 140.5, 139.7, 139.2, 139.1, 138.8, 138.6, 137.0, 136.7, 135.8, 134.9, 130.9, 128.9, 125.8, 118.6, 74.8, 74.1, 69.1, 53.9, 53.3, 51.9, 37.5; FT-IR  $\nu/\text{cm}^{-1}$  (KBr) 2946, 2032, 1734, 1502, 1430, 1266, 1242, 1193, 1173, 1163,

1137, 1113, 1078, 906, 838, 730, 527; UV-vis ( $\text{CHCl}_3$ )  $\lambda_{\text{max}}/\text{nm}$  256, 430, 590, 697;

MALDI-TOF MS  $m/z$  calcd for  $\text{C}_{76}\text{H}_{15}\text{NO}_4\text{S} [\text{M}]^-$  1037.0727, found 1037.0729.

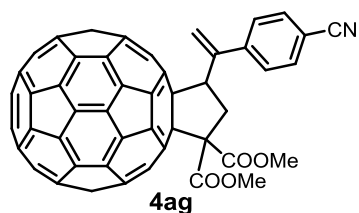

Compound **4ag**: the product mixture was separated and purified by silica gel column chromatography with  $\text{CS}_2$  as the eluent to recover unreacted  $\text{C}_{60}$ , and then the eluent was switched to  $\text{CS}_2/\text{DCM}$  (v/v = 6:1) to give **4ag** (23.6 mg, 47%), amorphous brown solid;  $^1\text{H}$  NMR (600 MHz,  $\text{CDCl}_3$ )  $\delta$  7.59 (d,  $J$  = 7.8 Hz, 2H), 7.51 (d,  $J$  = 7.8 Hz, 2H), 5.86 (s, 1H), 5.80 (s, 1H), 5.30 (dd,  $J$  = 14.4, 3.0 Hz, 1H), 4.17 (t,  $J$  = 13.8 Hz, 1H), 4.11 (s, 3H), 3.81 (s, 3H), 3.20 (dd,  $J$  = 13.8, 3.6 Hz, 1H);  $^{13}\text{C}\{^1\text{H}\}$  NMR (150 MHz,  $\text{CDCl}_3$ )  $\delta$  171.5, 169.2, 154.2, 153.8, 152.1, 151.0, 147.6, 147.4, 146.9, 146.6, 146.58, 146.5, 146.45, 146.3, 146.27, 146.2, 146.14, 146.1, 146.0, 145.84, 145.8, 145.77, 145.75, 145.6, 145.5, 145.43, 145.4, 145.36, 145.3, 145.28, 144.8, 144.7, 144.4, 143.3, 143.26, 143.0, 142.9, 142.7, 142.5, 142.46, 142.3, 142.04, 142.0, 141.9, 141.8, 141.7, 141.7, 141.4, 141.3, 139.6, 139.2, 139.1, 138.9, 138.6, 137.0, 136.8, 135.0, 132.2, 128.4, 120.3, 118.7, 111.8, 74.8, 74.1, 69.1, 53.9, 53.4, 51.9, 37.5; FT-IR  $\nu/\text{cm}^{-1}$  (KBr) 2947, 1735, 1431, 1267, 1243, 1194, 1174, 1079, 910, 844, 730, 527; UV-vis ( $\text{CHCl}_3$ )  $\lambda_{\text{max}}/\text{nm}$  255, 314, 430, 590, 697; MALDI-TOF MS  $m/z$  calcd for  $\text{C}_{76}\text{H}_{15}\text{NO}_4 [\text{M}]^-$  1005.1007, found 1005.1006.

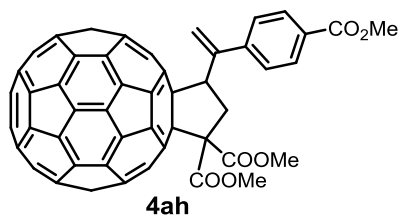

Compound **4ah**: the product mixture was separated and purified by silica gel column chromatography with CS<sub>2</sub> as the eluent to recover unreacted C<sub>60</sub>, and then the eluent was switched to CS<sub>2</sub>/DCM (v/v = 5:1) to give **4ah** (23.3 mg, 45%), amorphous brown solid; <sup>1</sup>H NMR (400 MHz, CDCl<sub>3</sub>) δ 8.82 (d, *J* = 8.4 Hz, 2H), 7.55 (d, *J* = 8.4 Hz, 2H), 5.81 (s, 1H), 5.79 (s, 1H), 5.36 (dd, *J* = 14.4, 3.6 Hz, 1H), 4.19 (t, *J* = 14.0 Hz, 1H), 4.12 (s, 3H), 3.87 (s, 3H), 3.81 (s, 3H), 3.22 (dd, *J* = 13.6, 4.0 Hz, 1H); <sup>13</sup>C{<sup>1</sup>H} NMR (150 MHz, CDCl<sub>3</sub>) δ 171.5, 169.3, 166.8, 154.5, 154.1, 152.2, 151.2, 147.5, 147.4, 147.0, 146.6, 146.57, 146.5, 146.4, 146.38, 146.2, 146.16, 146.1, 146.08, 145.9, 145.9, 145.86, 145.8, 145.7, 145.69, 145.5, 145.46, 145.4, 145.39, 145.35, 145.3, 145.2, 144.8, 144.64, 144.6, 144.4, 143.2, 143.19, 142.9, 142.8, 142.6, 142.5, 142.4, 142.3, 142.2, 142.1, 142.0, 141.8, 141.79, 141.7, 141.4, 141.3, 139.7, 139.1, 139.08, 138.8, 138.6, 137.0, 136.7, 134.9, 129.7, 129.69, 127.7, 119.4, 74.8, 74.2, 69.1, 53.8, 53.3, 52.3, 52.0, 37.6; FT-IR ν/cm<sup>-1</sup> (KBr) 2946, 1734, 1606, 1432, 1276, 1243, 1190, 1175, 1108, 1079, 908, 859, 780, 730, 527; UV-vis (CHCl<sub>3</sub>) λ<sub>max</sub>/nm 257, 313, 430, 590, 697; MALDI-TOF MS *m/z* calcd for C<sub>77</sub>H<sub>18</sub>O<sub>6</sub> [M]<sup>+</sup> 1038.1110, found 1038.1114.

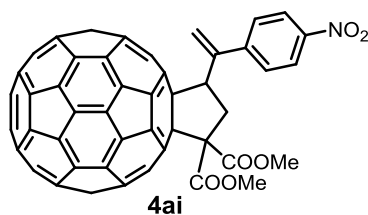

Compound **4ai**: the product mixture was separated and purified by silica gel column



chromatography with CS<sub>2</sub> as the eluent to recover unreacted C<sub>60</sub>, and then the eluent was switched to CS<sub>2</sub>/DCM (v/v = 7:1) to give **4ai** (20.5 mg, 40%), amorphous brown solid; <sup>1</sup>H NMR (600 MHz, CDCl<sub>3</sub>) δ 8.09 (d, *J* = 9.0 Hz, 2H), 7.65 (d, *J* = 9.0 Hz, 2H), 5.90 (s, 1H), 5.85 (s, 1H), 5.35 (dd, *J* = 14.4, 3.6 Hz, 1H), 4.18 (t, *J* = 13.8 Hz, 1H), 4.12 (s, 3H), 3.82 (s, 3H), 3.23 (dd, *J* = 13.2, 4.2 Hz, 1H); <sup>13</sup>C{<sup>1</sup>H} NMR (150 MHz, CDCl<sub>3</sub>) δ 171.5, 169.2, 154.1, 153.7, 152.0, 151.0, 148.0, 147.6, 147.5, 147.45, 146.9, 146.6, 146.58, 146.5, 146.45, 146.3, 146.25, 146.2, 146.1, 145.83, 145.82, 145.8, 145.6, 145.5, 145.4, 145.39, 145.32, 145.31, 145.3, 145.2, 144.8, 144.7, 144.6, 144.4, 143.3, 143.27, 143.0, 142.95, 142.9, 142.7, 142.6, 142.4, 142.3, 142.27, 142.04, 142.0, 141.9, 141.8, 141.7, 141.69, 141.4, 141.3, 139.6, 139.2, 139.19, 138.9, 138.7, 136.94, 136.9, 135.1, 128.6, 123.7, 121.0, 74.7, 74.1, 69.1, 53.9, 53.4, 52.1, 37.5; FT-IR ν/cm<sup>-1</sup> (KBr) 2946, 2920, 2847, 1735, 1594, 1518, 1431, 1342, 1266, 1243, 1193, 1174, 1138, 1112, 1078, 910, 856, 763, 730, 527; UV-vis (CHCl<sub>3</sub>) λ<sub>max</sub>/nm 257, 312, 430, 590, 633, 697; MALDI-TOF MS *m/z* calcd for C<sub>75</sub>H<sub>15</sub>NO<sub>6</sub> [M]<sup>-</sup> 1025.0905, found 1025.0901.

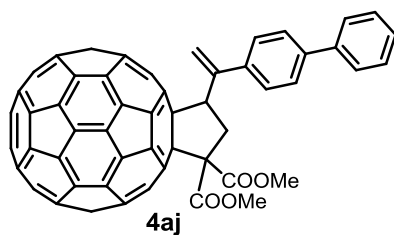

Compound **4aj**: the product mixture was separated and purified by silica gel column chromatography with CS<sub>2</sub> as the eluent to recover unreacted C<sub>60</sub>, and then the eluent was switched to CS<sub>2</sub>/DCM (v/v = 8:1) to give **4aj** (14.3 mg, 27%), amorphous brown solid; <sup>1</sup>H NMR (600 MHz, CDCl<sub>3</sub>) δ 7.56–7.54 (m, 2H), 7.51–7.49 (m, 2H),

7.45–7.44 (m, 2H), 7.41–7.38 (m, 2H), 7.33–7.30 (m, 1H), 5.78 (s, 1H), 5.74 (s, 1H), 5.38 (dd,  $J = 14.4, 3.6$  Hz, 1H), 4.21 (t,  $J = 14.4$  Hz, 1H), 4.12 (s, 3H), 3.82 (s, 3H), 3.24 (dd,  $J = 13.2, 4.2$  Hz, 1H);  $^{13}\text{C}\{^1\text{H}\}$  NMR (150 MHz,  $\text{CDCl}_3$ )  $\delta$  171.6, 169.4, 154.9, 154.3, 152.3, 151.4, 147.5, 147.4, 147.1, 146.9, 146.6, 146.5, 146.4, 146.3, 146.2, 146.16, 146.1, 146.05, 145.92, 145.9, 145.86, 145.7, 145.5, 145.46, 145.42, 145.4, 145.3, 145.25, 145.2, 144.9, 144.7, 144.6, 144.4, 143.2, 143.17, 142.9, 142.87, 142.8, 142.6, 142.5, 142.48, 142.4, 142.2, 142.1, 142.0, 141.8, 141.7, 141.69, 141.34, 141.3, 141.1, 140.6, 140.3, 139.8, 139.1, 138.9, 138.8, 138.4, 137.1, 136.5, 134.9, 128.9, 128.3, 127.6, 127.1, 127.05, 117.4, 74.8, 74.3, 69.2, 53.8, 53.3, 52.2, 37.7; FT-IR  $\nu/\text{cm}^{-1}$  (KBr) 2946, 1735, 1485, 1430, 1264, 1242, 1190, 1173, 1078, 905, 842, 768, 659, 527; UV-vis ( $\text{CHCl}_3$ )  $\lambda_{\text{max}}/\text{nm}$  257, 431, 590, 698; MALDI-TOF MS  $m/z$  calcd for  $\text{C}_{81}\text{H}_{20}\text{O}_4$   $[\text{M}]^-$  1056.1367, found 1056.1365.

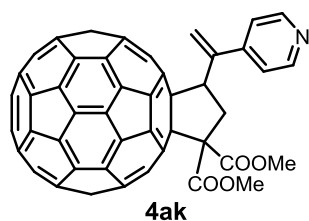

Compound **4ak**: the product mixture was separated and purified by silica gel column chromatography with  $\text{CS}_2$  as the eluent to recover unreacted  $\text{C}_{60}$ , and then the eluent was switched to  $\text{CS}_2/\text{DCM}$  (v/v = 7:1) to give **4ak** (20.1 mg, 41%), amorphous brown solid;  $^1\text{H}$  NMR (600 MHz,  $\text{CDCl}_3$ )  $\delta$  8.47 (d,  $J = 4.8$  Hz, 2H), 7.39 (d,  $J = 5.4$  Hz, 2H), 5.89 (s, 1H), 5.87 (s, 1H), 5.32 (dd,  $J = 14.4, 3.6$  Hz, 1H), 4.18 (t,  $J = 13.8$  Hz, 1H), 4.11 (s, 3H), 3.81 (s, 3H), 3.20 (dd,  $J = 13.6, 3.6$  Hz, 1H);  $^{13}\text{C}\{^1\text{H}\}$  NMR (150 MHz,  $\text{CDCl}_3$ )  $\delta$  171.5, 169.2, 154.3, 153.9, 152.1, 151.1, 150.1, 148.9, 147.6, 147.4, 146.9,

146.6, 146.57, 146.5, 146.4, 146.37, 146.3, 146.2, 146.14, 146.1, 145.9, 145.8, 145.77, 145.75, 145.6, 145.5, 145.45, 145.4, 145.38, 145.3, 144.8, 144.7, 144.66, 144.65, 144.4, 143.3, 143.2, 142.93, 142.9, 142.87, 142.7, 142.5, 142.48, 142.3, 142.26, 142.1, 141.9, 141.8, 141.7, 141.4, 141.3, 139.6, 139.2, 139.17, 138.9, 138.8, 137.0, 136.8, 135.0, 122.3, 120.5, 74.7, 74.1, 69.1, 53.9 53.4 51.5 37.5; FT-IR  $\nu/\text{cm}^{-1}$  (KBr) 2946, 1734, 1591, 1431, 1268, 1242, 1194, 1174, 1078, 910, 831, 729, 527; UV-vis ( $\text{CHCl}_3$ )  $\lambda_{\text{max}}/\text{nm}$  256, 314, 429, 590, 697; MALDI-TOF MS  $m/z$  calcd for  $\text{C}_{74}\text{H}_{15}\text{NO}_4$   $[\text{M}]^-$  981.1007, found 981.1005.

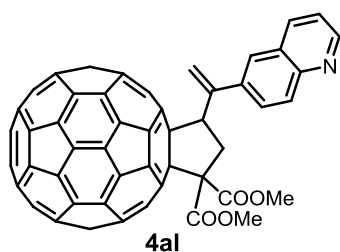

Compound **4al**: the product mixture was separated and purified by silica gel column chromatography with  $\text{CS}_2$  as the eluent to recover unreacted  $\text{C}_{60}$ , and then the eluent was switched to  $\text{CS}_2/\text{DCM}$  ( $v/v = 7:1$ ) to give **4al** (28.9 mg, 56%), amorphous brown solid;  $^1\text{H}$  NMR (400 MHz,  $\text{CDCl}_3$ )  $\delta$  8.84 (dd,  $J = 4.4, 1.6$  Hz, 1H), 8.06 (d,  $J = 7.6$  Hz, 1H), 7.96 (d,  $J = 8.8$  Hz, 1H), 7.91 (d,  $J = 2.0$  Hz, 1H), 7.84 (dd,  $J = 2.0$  Hz,  $J = 8.8$  Hz, 1H), 7.34 (q,  $J = 4.0$  Hz, 1H), 5.88 (s, 1H), 5.86 (s, 1H), 5.47 (dd,  $J = 14.4, 4.0$  Hz, 1H), 4.23 (t,  $J = 14.0$  Hz, 1H), 4.14 (s, 3H), 3.82 (s, 3H), 3.28 (d,  $J = 13.6, 4.0$  Hz, 1H);  $^{13}\text{C}\{^1\text{H}\}$  NMR (150 MHz,  $\text{CDCl}_3$ )  $\delta$  171.6 169.3, 154.6 154.1, 152.3 151.2, 150.9, 148.0, 147.5, 147.4, 147.0, 146.6, 146.53, 146.5, 146.4, 146.3, 146.2, 146.15, 146.1, 146.0, 145.9, 145.84, 145.8, 145.7, 145.5, 145.4, 145.38, 145.3, 145.25, 145.1, 144.8, 144.6, 144.58, 144.4, 143.2, 142.9, 142.86, 142.8, 142.6, 142.5, 142.4, 142.3,

142.2, 142.0, 141.9, 141.8, 141.7, 141.68, 141.3, 141.26, 139.7, 139.5, 139.2, 139.0, 138.8, 138.3, 137.1, 136.6, 136.3, 134.9, 129.7, 129.5, 127.9, 126.8, 121.7, 118.9, 74.8, 74.2, 69.2, 53.9, 53.3, 52.2, 37.7; FT-IR  $\nu/\text{cm}^{-1}$  (KBr) 2946, 1734, 1430, 1266, 1241, 1193, 1172, 1138, 1112, 1079, 906, 838, 729, 527; UV-vis ( $\text{CHCl}_3$ )  $\lambda_{\text{max}}/\text{nm}$  254, 312, 430, 590, 697; MALDI-TOF MS  $m/z$  calcd for  $\text{C}_{78}\text{H}_{17}\text{NO}_4$   $[\text{M}]^-$  1031.1163, found 1031.1165.

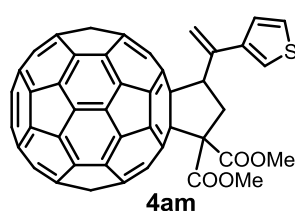

Compound **4am**: the product mixture was separated and purified by silica gel column chromatography with  $\text{CS}_2$  as the eluent to recover unreacted  $\text{C}_{60}$ , and then the eluent was switched to  $\text{CS}_2/\text{DCM}$  ( $v/v = 8:1$ ) to give **4am** (16.3 mg, 33%), amorphous brown solid;  $^1\text{H}$  NMR (600 MHz,  $\text{CDCl}_3/\text{CS}_2$ ,  $v/v = 10:1$ )  $\delta$  7.34–7.33 (m, 1H), 7.20–7.19 (m, 1H), 7.17–7.15 (m, 1H), 5.79 (s, 1H), 5.65 (s, 1H), 5.20 (dd,  $J = 15.0$ , 3.6 Hz, 1H), 4.16 (t,  $J = 14.4$  Hz, 1H), 4.08 (s, 3H), 3.80 (s, 3H), 3.14 (dd,  $J = 13.2$ , 4.2 Hz, 1H);  $^{13}\text{C}\{^1\text{H}\}$  NMR (150 MHz,  $\text{CDCl}_3/\text{CS}_2$ ,  $v/v = 10:1$ )  $\delta$  171.0, 168.8, 154.9, 154.3, 152.0, 151.2, 147.3, 147.2, 146.9, 146.5, 146.4, 146.34, 146.3, 146.2, 146.1, 146.0, 145.9, 145.89, 145.74, 145.73, 145.7, 145.6, 145.32, 145.3, 145.25, 145.1, 145.0, 144.7, 144.6, 144.4, 144.2, 143.0, 143.0, 142.8, 142.7, 142.67, 142.6, 142.5, 142.4, 142.3, 142.2, 142.1, 141.9, 141.7, 141.6, 141.57, 141.5, 141.2, 141.1, 140.9, 139.7, 139.0, 138.97, 138.7, 138.5, 137.0, 136.3, 134.4, 126.8, 126.0, 123.2, 115.5, 74.5, 74.0, 68.8, 53.3, 52.9, 52.7, 37.3; FT-IR  $\nu/\text{cm}^{-1}$  (KBr) 2946, 1732, 1626, 1431,

1268, 1239, 1174, 1138, 1113, 1079, 905, 788, 735, 575, 527; UV-vis ( $\text{CHCl}_3$ )  $\lambda_{\text{max}}/\text{nm}$  256, 312, 431, 695; MALDI-TOF MS  $m/z$  calcd for  $\text{C}_{73}\text{H}_{14}\text{O}_4\text{S}$   $[\text{M}]^-$  986.0618, found 986.0793.

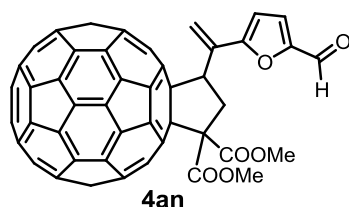

Compound **4an**: the product mixture was separated and purified by silica gel column chromatography with  $\text{CS}_2$  as the eluent to recover unreacted  $\text{C}_{60}$ , and then the eluent was switched to  $\text{CS}_2/\text{DCM}$  (v/v = 8:1) to give **4an** (16.5 mg, 33%), amorphous brown solid;  $^1\text{H}$  NMR (600 MHz,  $\text{CDCl}_3$ )  $\delta$  9.56 (s, 1H), 7.16 (d,  $J$  = 4.2 Hz, 1H), 6.77 (d,  $J$  = 4.2 Hz, 1H), 6.38 (s, 1H), 5.91 (s, 1H), 5.18 (dd,  $J$  = 13.8, 4.2 Hz, 1H), 4.21 (t,  $J$  = 14.4 Hz, 1H), 4.08 (s, 3H), 3.82 (s, 3H), 3.13 (dd,  $J$  = 13.8, 4.2 Hz, 1H);  $^{13}\text{C}\{^1\text{H}\}$  NMR (150 MHz,  $\text{CDCl}_3$ )  $\delta$  177.7, 171.3, 169.2, 159.1, 154.7, 154.0, 152.1, 152.0, 151.1, 147.6, 147.5, 146.9, 146.6, 146.5, 146.47, 146.4, 146.3, 146.26, 146.2, 146.19, 146.18, 145.9, 145.85, 145.8, 145.7, 145.6, 145.5, 145.47, 145.34, 145.3, 145.2, 145.1, 144.8, 144.7, 144.65, 144.4, 143.3, 143.2, 142.9, 142.7, 142.5, 142.48, 142.4, 142.3, 142.2, 142.1, 141.9, 141.8, 141.75, 141.7, 141.67, 141.4, 139.8, 139.7, 139.3, 139.2, 138.9, 137.0, 136.8, 134.7, 134.6, 119.6, 111.4, 74.5, 74.1, 69.1, 53.8, 53.4, 50.5, 37.2; FT-IR  $\nu/\text{cm}^{-1}$  (KBr) 2947, 1733, 1678, 1562, 1500, 1430, 1261, 1244, 1195, 1175, 1139, 1079, 1027, 968, 908, 796, 766, 728, 527; UV-vis ( $\text{CHCl}_3$ )  $\lambda_{\text{max}}/\text{nm}$  258, 314, 430, 694; MALDI-TOF MS  $m/z$  calcd for  $\text{C}_{74}\text{H}_{14}\text{O}_6$   $[\text{M}]^-$  998.0796, found 998.0799.

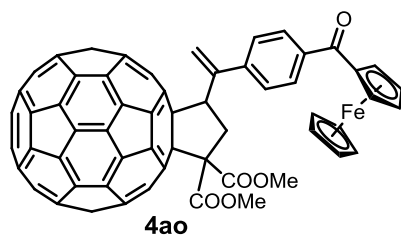

Compound **4ao**: the product mixture was separated and purified by silica gel column chromatography with CS<sub>2</sub> as the eluent to recover unreacted C<sub>60</sub>, and then the eluent was switched to CS<sub>2</sub>/DCM (v/v = 7:1) to give **4ao** (30.4 mg, 51%), amorphous brown solid; <sup>1</sup>H NMR (400 MHz, CDCl<sub>3</sub>) δ 7.70 (d, *J* = 8.4 Hz, 2H), 7.58 (d, *J* = 8.4 Hz, 2H), 5.81 (s, 2H), 5.42 (dd, *J* = 14.4, 3.6 Hz, 1H), 4.74–4.73 (m, 1H), 4.71–4.70 (m, 1H), 4.54–4.52 (m, 2H), 4.22 (t, *J* = 14.0 Hz, 1H), 4.13 (s, 3H), 4.11 (s, 5H), 3.82 (s, 3H), 3.25 (dd, *J* = 13.6, 4.0 Hz, 1H); <sup>13</sup>C{<sup>1</sup>H} NMR (150 MHz, CDCl<sub>3</sub>) δ 198.6, 171.6, 169.3, 154.7, 154.0, 152.3, 151.3, 147.5, 147.4, 147.0, 146.8, 146.6, 146.59, 146.5, 146.4, 146.3, 146.14, 146.12, 146.1, 145.94, 145.9, 145.87, 145.86, 145.7, 145.5, 145.44, 145.43, 145.4, 145.3, 145.0, 144.8, 144.7, 144.6, 144.4, 144.37, 143.3, 143.2, 142.94, 142.9, 142.7, 142.5, 142.4, 142.35, 142.3, 142.2, 141.9, 141.85, 141.8, 141.7, 141.67, 141.4, 141.3, 139.7, 139.5, 139.2, 138.9, 138.85, 138.2, 137.0, 136.7, 135.0, 128.0, 127.8, 118.4, 78.1, 74.9, 74.1, 72.9, 72.88, 71.7, 71.6, 70.5, 69.2, 53.9, 53.3, 52.0, 37.4; FT-IR ν/cm<sup>-1</sup> (KBr) 3092, 2948, 1757, 1735, 1634, 1604, 1513, 1445, 1430, 1375, 1264, 1240, 1189, 1173, 1138, 1117, 1080, 1046, 1027, 857, 829, 779, 763, 575, 527; UV-vis (CHCl<sub>3</sub>) λ<sub>max</sub>/nm 257, 310, 430, 695; MALDI-TOF MS *m/z* calcd for C<sub>86</sub>H<sub>24</sub>FeO<sub>5</sub> [M]<sup>+</sup> 1192.0979, found 1192.0981.

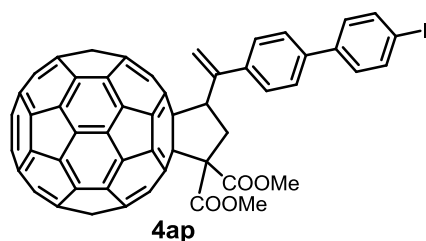

Compound **4ap**: the product mixture was separated and purified by silica gel column chromatography with CS<sub>2</sub> as the eluent to recover unreacted C<sub>60</sub>, and then the eluent was switched to CS<sub>2</sub>/DCM (v/v = 8:1) to give **4ap** (11.8 mg, 20%), amorphous brown solid; <sup>1</sup>H NMR (400 MHz, CDCl<sub>3</sub>) δ 7.71 (d, *J* = 8.4 Hz, 2H), 7.54 (d, *J* = 8.4 Hz, 2H), 7.39 (d, *J* = 8.4 Hz, 2H), 7.23 (d, *J* = 8.4 Hz, 2H), 5.78 (s, 1H), 5.75 (s, 1H), 5.36 (dd, *J* = 14.4, 4.0 Hz, 1H), 4.19 (t, *J* = 14.0 Hz, 1H), 4.12 (s, 3H), 3.81 (s, 3H), 3.24 (dd, *J* = 13.6, 4.0 Hz, 1H); <sup>13</sup>C{<sup>1</sup>H} NMR (150 MHz, CDCl<sub>3</sub>) δ 171.6, 169.4, 154.9, 154.2, 152.3, 151.3, 147.5, 147.4, 147.0, 146.8, 146.6, 146.55, 146.4, 146.35, 146.2, 146.15, 146.1, 146.07, 146.06, 146.0, 145.9, 145.85, 145.7, 145.5, 145.47, 145.43, 145.4, 145.3, 145.25, 145.2, 144.8, 144.7, 144.6, 144.4, 143.2, 143.18, 142.9, 142.88, 142.8, 142.6, 142.5, 142.3, 142.2, 142.1, 141.9, 141.82, 141.8, 141.7, 141.4, 141.3, 140.8, 140.0, 139.9, 139.7, 139.1, 138.9, 138.8, 138.4, 138.0, 137.1, 136.5, 134.9, 128.9, 128.5, 126.8, 117.7, 93.4, 74.8, 74.3, 69.2, 53.8, 53.3, 52.2, 37.7; FT-IR ν/cm<sup>-1</sup> (KBr) 2946, 1735, 1478, 1431, 1266, 1243, 1192, 1173, 1079, 999, 905, 813, 731, 527; UV-vis (CHCl<sub>3</sub>) λ<sub>max</sub>/nm 256, 431, 591, 697; MALDI-TOF MS *m/z* calcd for C<sub>81</sub>H<sub>19</sub>IO<sub>4</sub> [M]<sup>-</sup> 1182.0334, found 1182.0336.

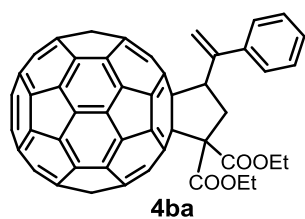

Compound **4ba**: the product mixture was separated and purified by silica gel column chromatography with CS<sub>2</sub> as the eluent to recover unreacted C<sub>60</sub>, and then the eluent was switched to CS<sub>2</sub>/DCM (v/v = 8:1) to give **4ba** (13.5 mg, 27%), amorphous brown solid; <sup>1</sup>H NMR (400 MHz, CDCl<sub>3</sub>) δ 7.48–7.46 (m, 2H), 7.22–7.19 (m, 3H), 5.72 (s, 2H), 5.36 (dd, *J* = 12.0, 4.0 Hz, 1H), 4.66–4.50 (m, 2H), 4.45–4.38 (m, 1H), 4.21–4.11 (m, 2H), 3.22 (dd, *J* = 16.0, 4.0 Hz, 1H), 1.50 (t, *J* = 8.0 Hz, 3H), 1.22 (t, *J* = 8.0 Hz, 3H); <sup>13</sup>C{<sup>1</sup>H} NMR (150 MHz, CDCl<sub>3</sub>) δ 171.2, 169.0, 155.1, 154.4, 152.6, 151.5, 147.5, 147.4, 147.3, 146.9, 146.7, 146.6, 146.55, 146.4, 146.36, 146.3, 146.2, 146.1, 146.08, 146.05, 145.94, 145.9, 145.7, 145.5, 145.45, 145.4, 145.39, 145.3, 145.25, 145.1, 144.9, 144.7, 144.6, 144.4, 143.2, 143.17, 142.9, 142.87, 142.8, 142.6, 142.5, 142.4, 142.2, 142.1, 141.9, 141.83, 141.8, 141.7, 141.66, 141.4, 141.36, 141.3, 139.7, 139.0, 138.88, 138.6, 138.4, 137.1, 136.5, 134.9, 128.4, 128.3, 127.9, 117.4, 74.8, 74.3, 69.0, 62.8, 62.6, 52.1, 37.7, 14.4, 14.1; FT-IR ν/cm<sup>-1</sup> (KBr) 2976, 1731, 1462, 1440, 1264, 1238, 1180, 1137, 1112, 1079, 1010, 904, 776, 731, 698, 576, 527; UV-vis (CHCl<sub>3</sub>) λ<sub>max</sub>/nm 256, 312, 431, 699; MALDI-TOF MS *m/z* calcd for C<sub>77</sub>H<sub>20</sub>O<sub>4</sub> [M]<sup>-</sup> 1008.1367, found 1008.1369.

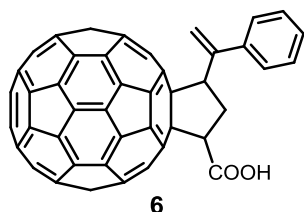

Compound **6**: the product mixture was separated and purified by silica gel column chromatography with CS<sub>2</sub> as the eluent to recover unreacted C<sub>60</sub>, and then the eluent was switched to CS<sub>2</sub>/DCM/EtOAc (v/v/v = 10:5:2) to give **6** (30.0 mg, 66%),



amorphous brown solid;  $^1\text{H}$  NMR (600 MHz,  $\text{DMSO-}d_6/\text{CS}_2$ , v/v = 1:10)  $\delta$  12.79 (s, 1H), 7.44 (d,  $J$  = 7.8 Hz, 2H), 7.16–7.11 (m, 3H), 5.70 (s, 1H), 5.63 (s, 1H), 5.11 (d,  $J$  = 12.6 Hz, 1H), 4.69 (d,  $J$  = 9.0 Hz, 1H), 3.54 (q,  $J$  = 13.2 Hz, 1H), 2.92 (d,  $J$  = 12.6 Hz, 1H);  $^{13}\text{C}\{^1\text{H}\}$  NMR (150 MHz,  $\text{DMSO-}d_6/\text{CS}_2$ , v/v = 1:10)  $\delta$  155.3, 155.2, 153.8, 153.5, 147.1, 147.0, 146.7, 146.0, 145.9, 145.6, 145.5, 145.2, 145.1, 145.06, 144.9, 144.82, 144.8, 144.7, 144.6, 144.1, 144.0, 143.98, 143.95, 143.9, 143.5, 143.4, 143.22, 143.2, 141.9, 141.8, 141.5, 141.4, 141.39, 141.1, 141.0, 140.96, 140.9, 140.8, 140.6, 140.5, 140.4, 140.3, 138.2, 137.7, 137.4, 135.3, 135.0, 134.0, 133.2, 127.3, 126.8, 126.6, 116.2, 73.9, 72.1, 55.0, 33.3, 29.1; FT-IR  $\nu/\text{cm}^{-1}$  (KBr) 2959, 2926, 1716, 1575, 1420, 1261, 1212, 1177, 1097, 1051, 1026, 905, 804, 776, 696, 527; UV-vis ( $\text{CHCl}_3$ )  $\lambda_{\text{max}}/\text{nm}$  256, 311, 431, 689; MALDI-TOF MS  $m/z$  calcd for  $\text{C}_{72}\text{H}_{12}\text{O}_2$   $[\text{M}]^+$  908.0832, found 908.0836.

## 6. $^1\text{H}$ NMR and $^{13}\text{C}$ NMR Spectra of Compounds 4

### $^1\text{H}$ NMR (600 MHz, $\text{CDCl}_3/\text{CS}_2$ ) of compound 4aa

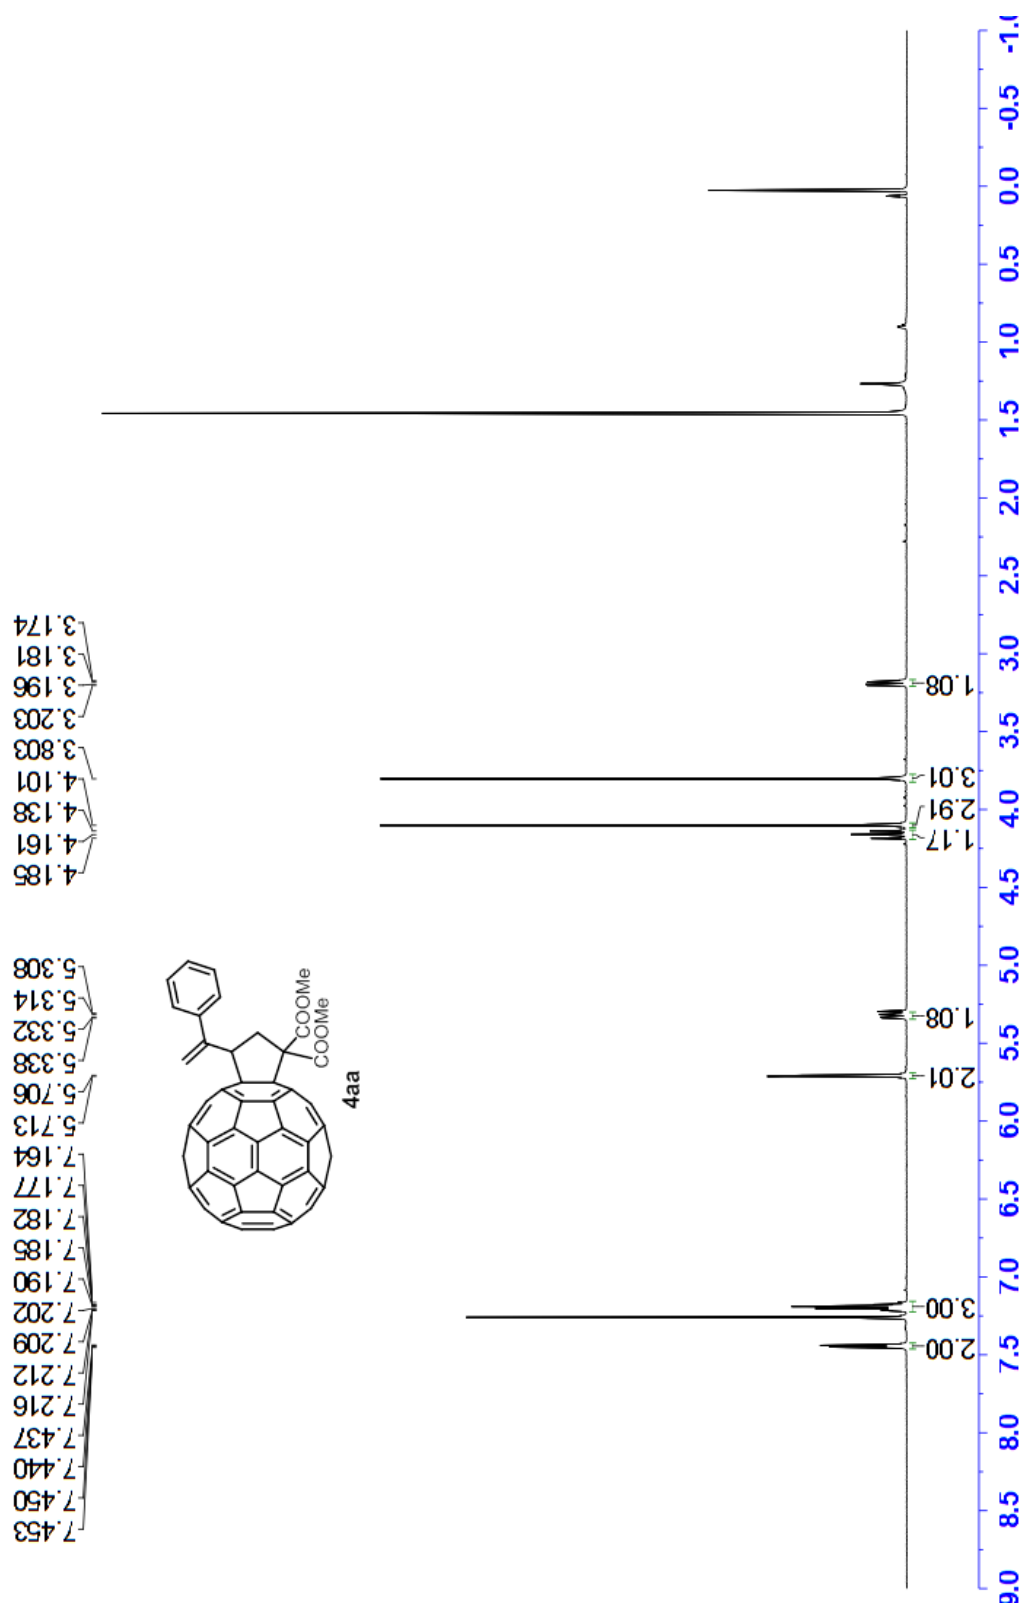

**$^{13}\text{C}$  NMR (150 MHz,  $\text{CDCl}_3/\text{CS}_2$ ) of compound 4aa**

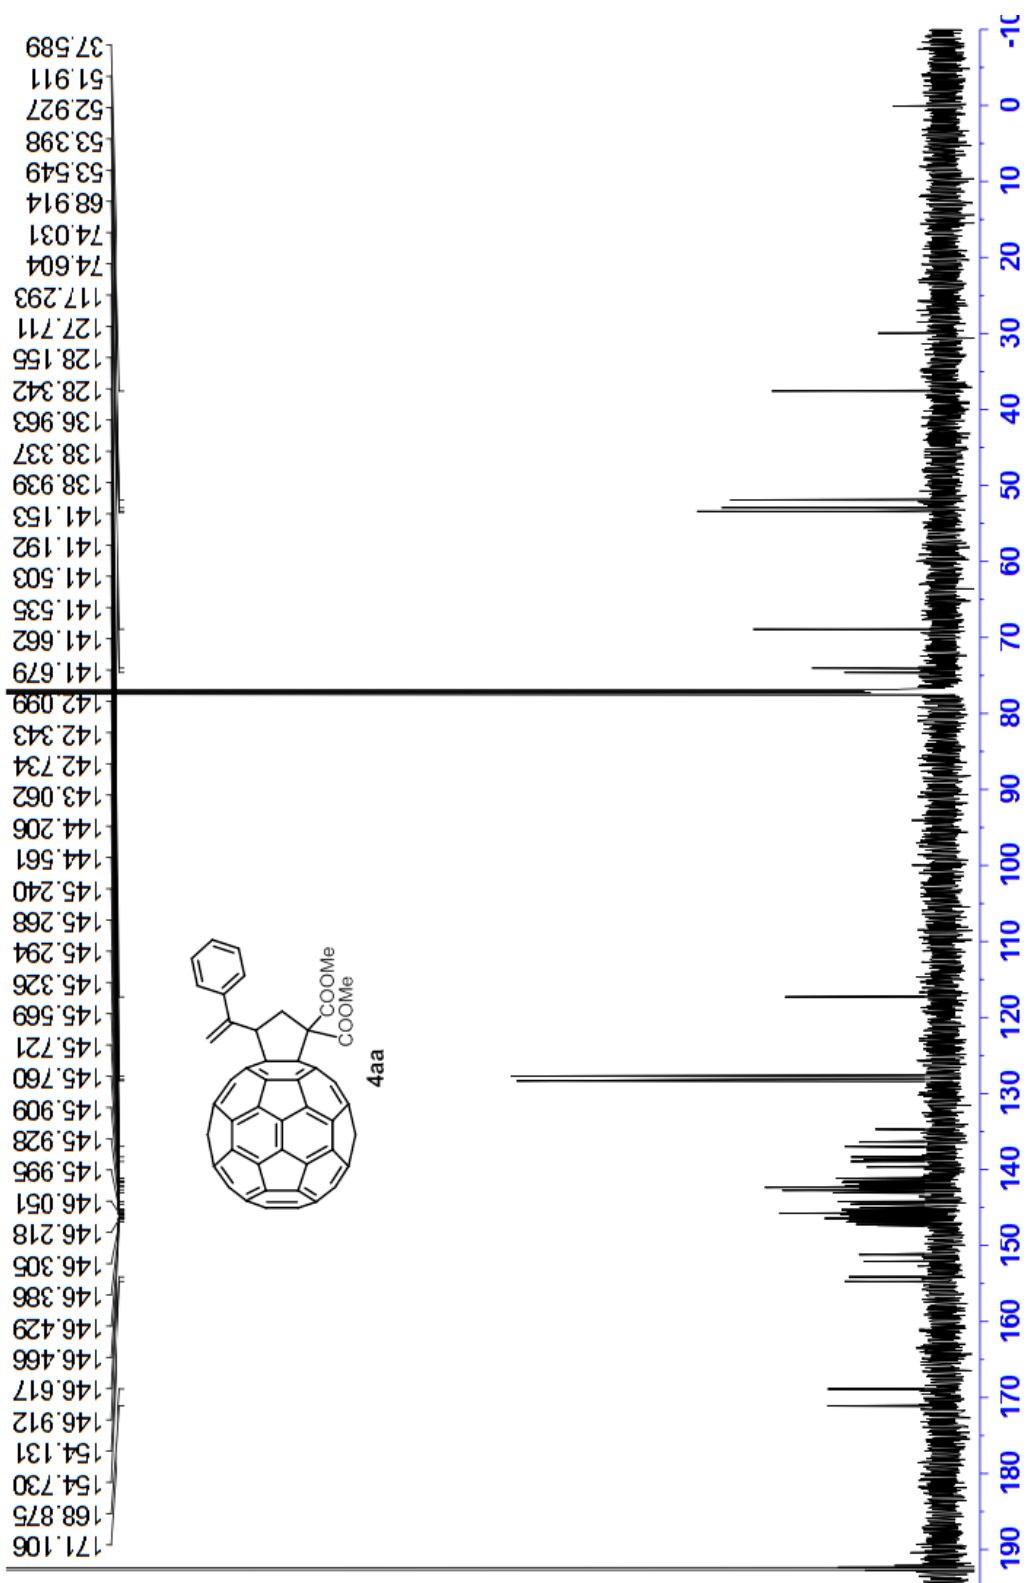

**<sup>1</sup>H NMR (400 MHz, CDCl<sub>3</sub>) of compound 4ab**

7.363, 7.342, 7.019, 6.999, 5.688, 5.662, 5.334, 5.325, 5.299, 5.289, 4.207, 4.173, 4.137, 4.104, 3.805, 3.232, 3.221, 3.198, 3.188, 2.260

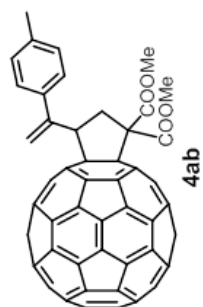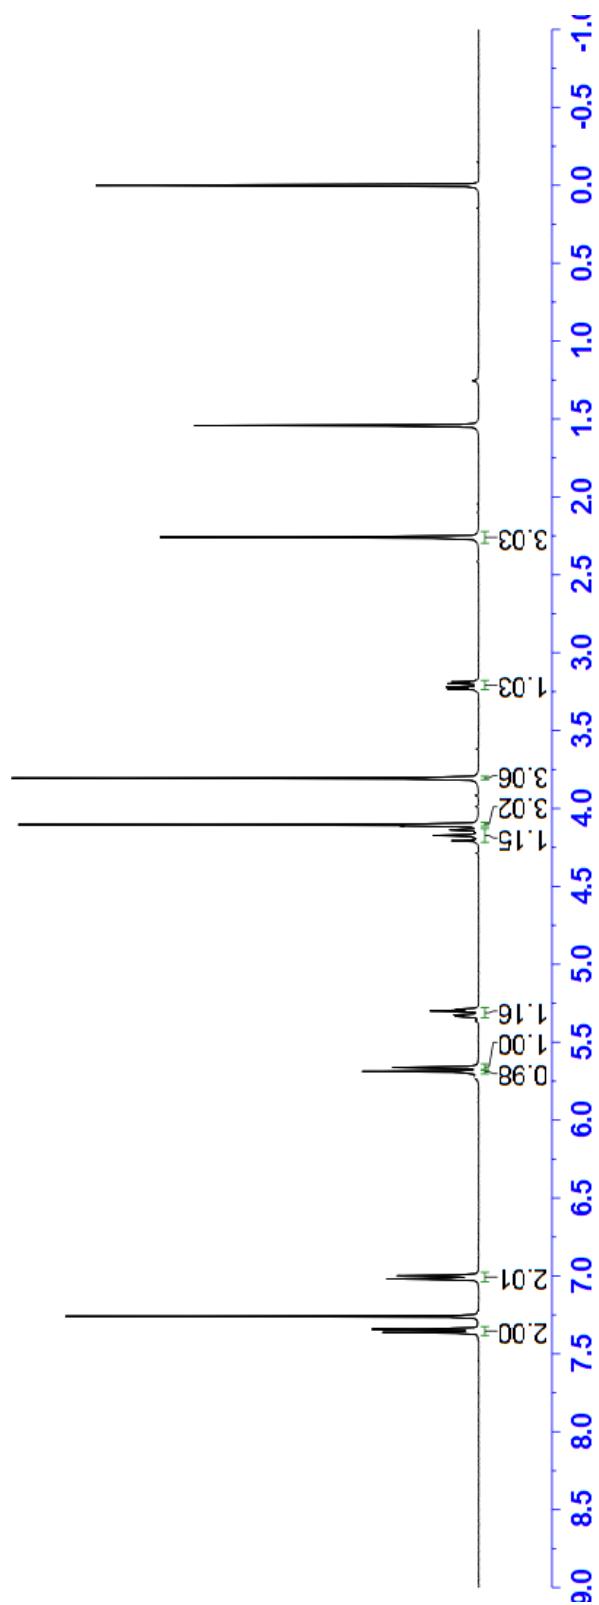

**$^{13}\text{C}$  NMR (150 MHz,  $\text{CDCl}_3$ ) of compound 4ab**

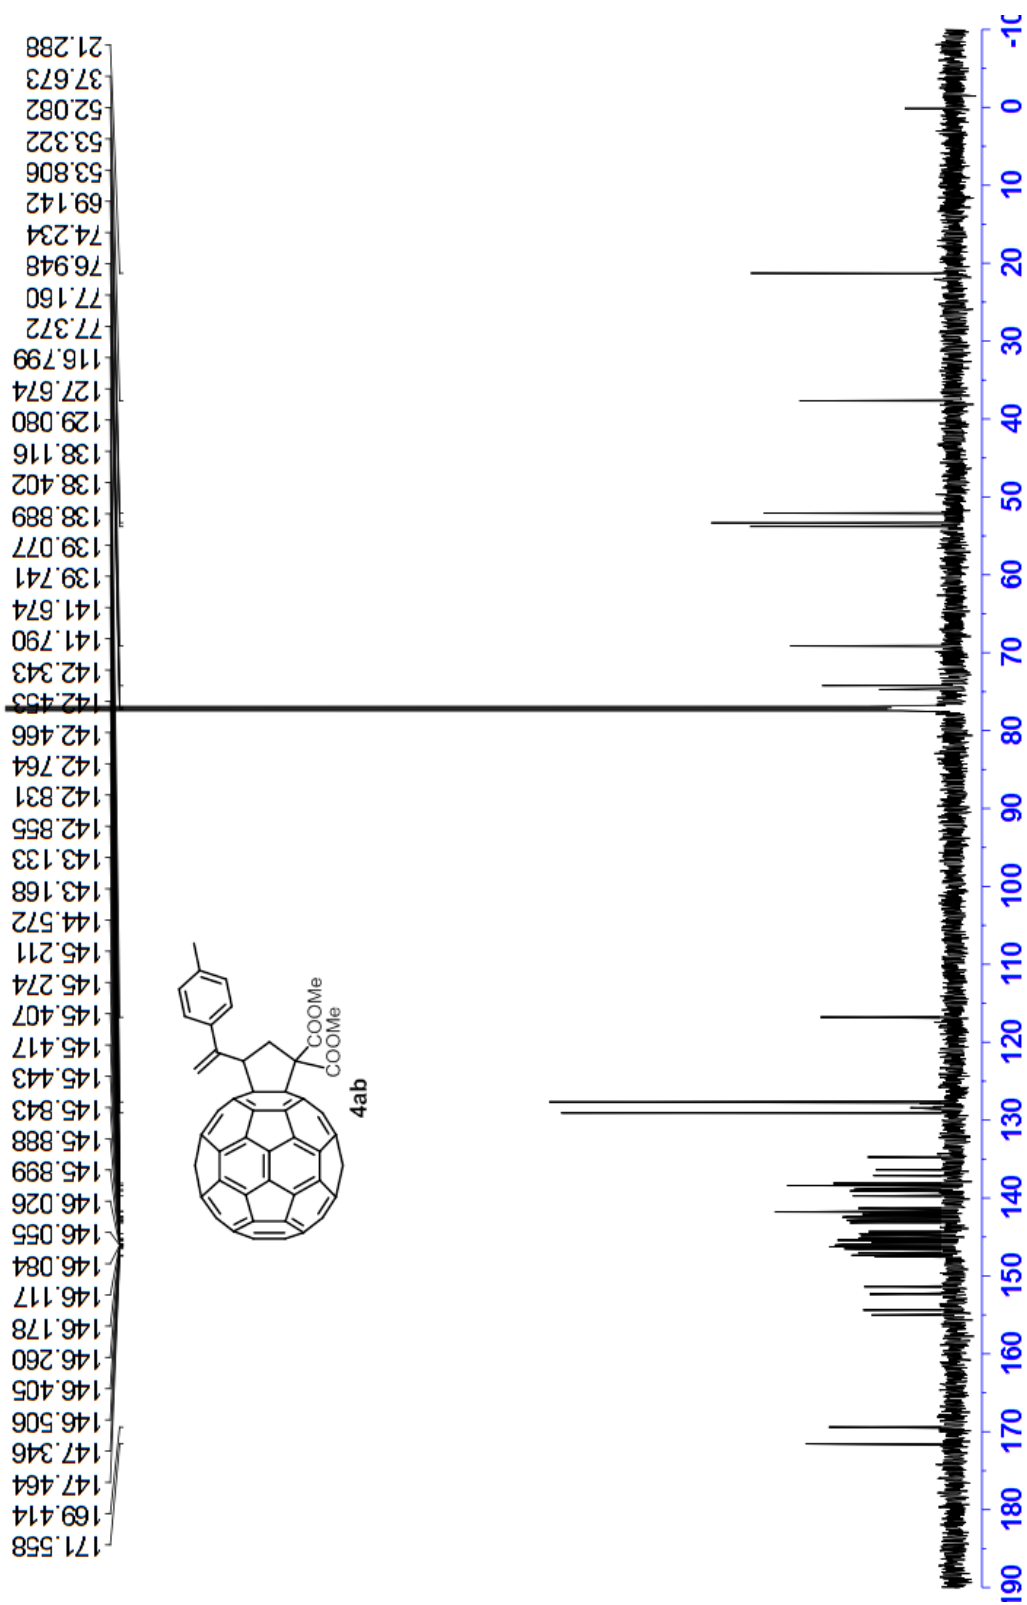

**<sup>1</sup>H NMR (400 MHz, CDCl<sub>3</sub>) of compound 4ac**

7.412, 7.404, 7.399, 7.387, 7.382, 7.375, 7.260, 6.750, 6.745, 6.733, 6.728, 6.638, 5.629, 5.315, 5.306, 5.279, 5.270, 4.206, 4.171, 4.136, 4.103, 3.806, 3.733, 3.226, 3.215, 3.192, 3.182

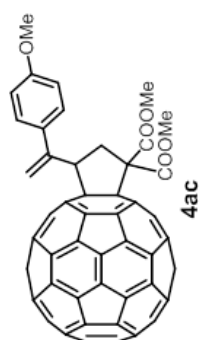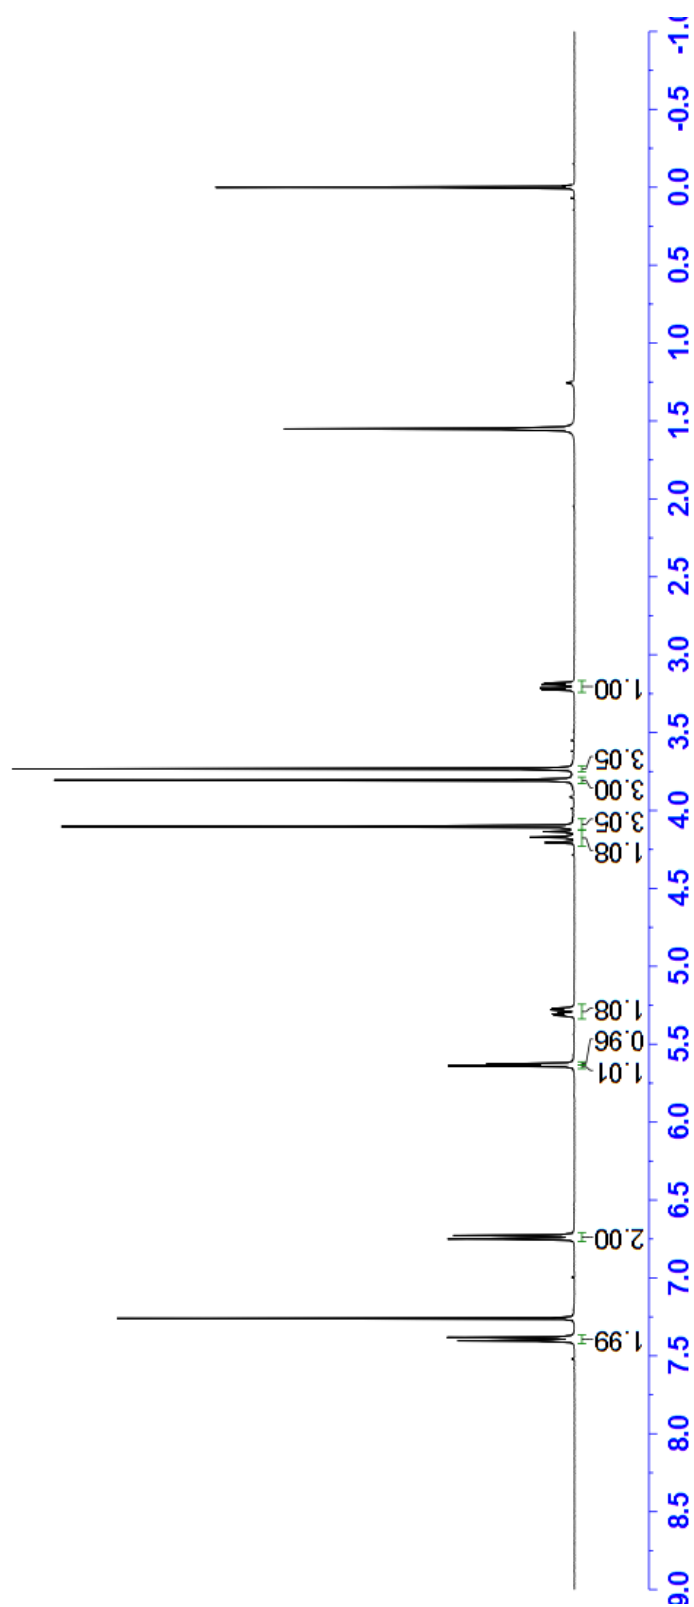

**$^{13}\text{C}$  NMR (150 MHz,  $\text{CDCl}_3$ ) of compound 4ac**

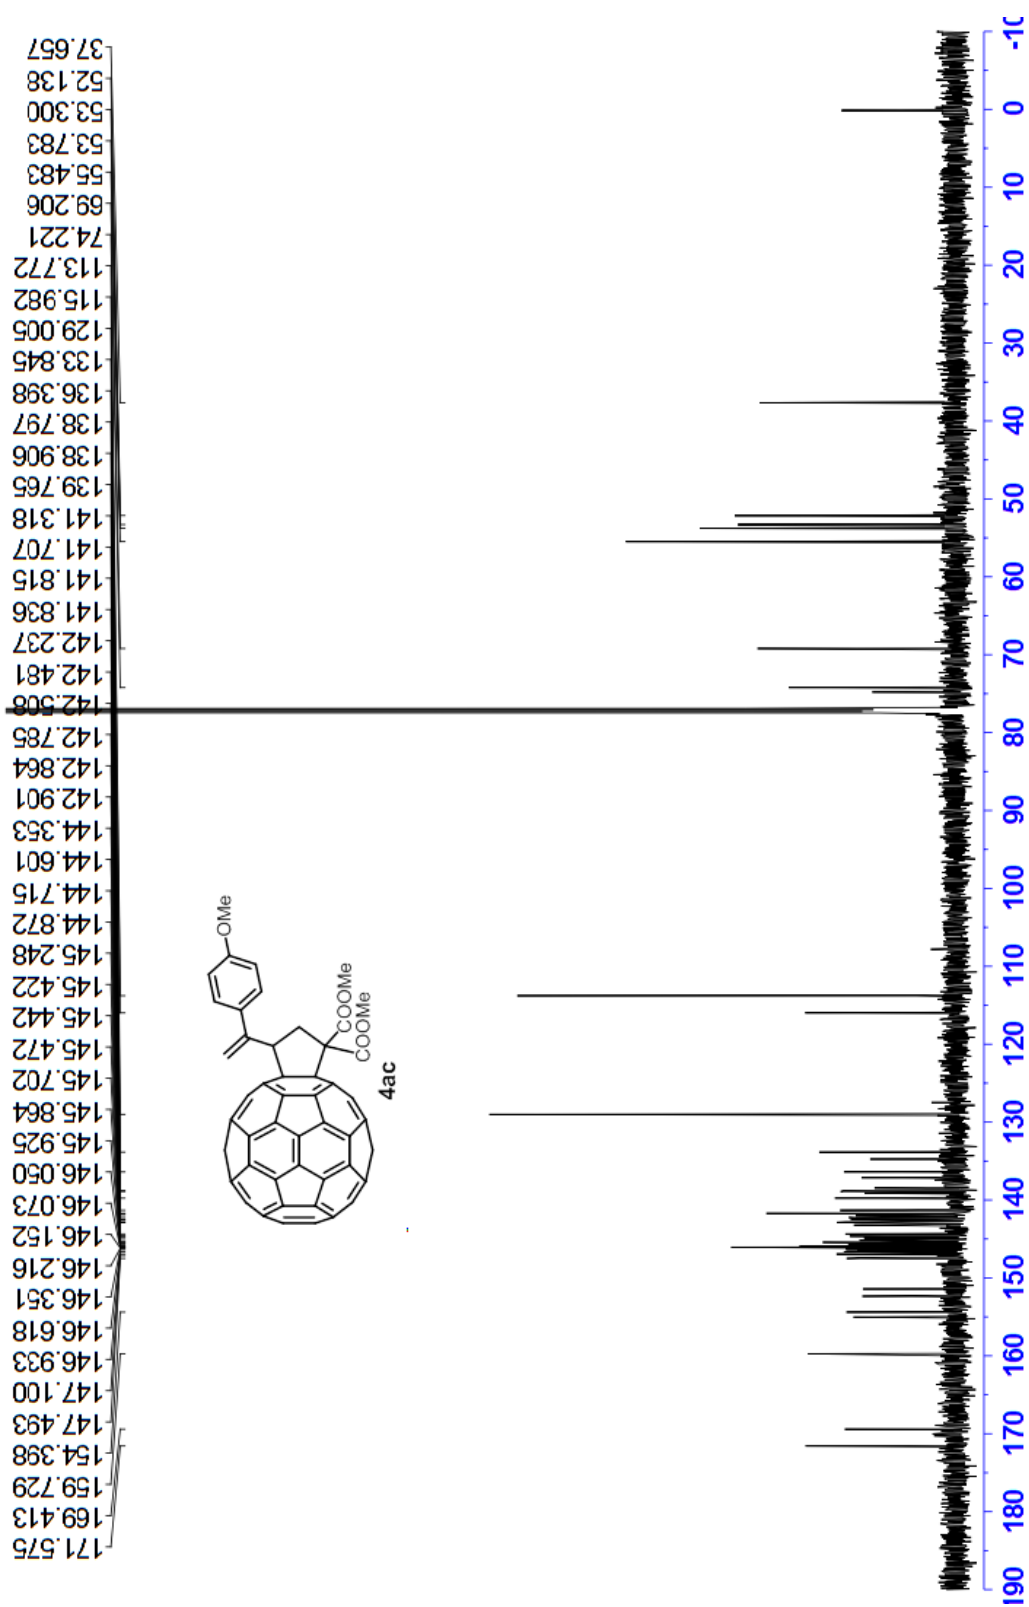

**$^1\text{H}$  NMR (600 MHz,  $\text{CDCl}_3$ ) of compound 4ad**

7.343, 7.260, 5.733, 5.711, 5.287, 5.281, 5.263, 5.257, 4.182, 4.158, 4.135, 4.104, 3.807, 3.211, 3.205, 3.189, 3.182

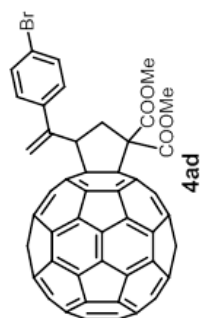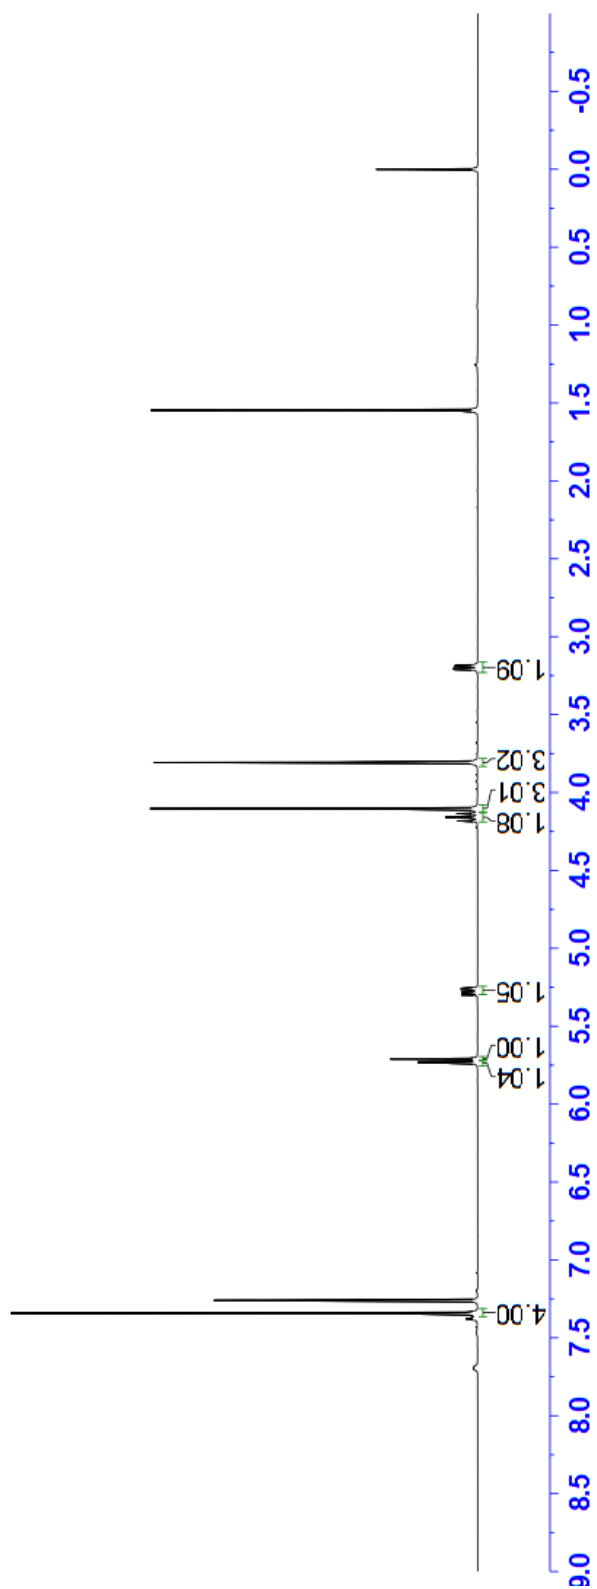





**$^1\text{H}$  NMR (400 MHz,  $\text{CDCl}_3$ ) of compound 4ae**

7.747, 7.726, 7.663, 7.642, 5.857, 5.835, 5.399, 5.390, 5.363, 5.354, 4.227, 4.192, 4.157, 4.120, 3.814, 3.247, 3.237, 3.214, 3.204

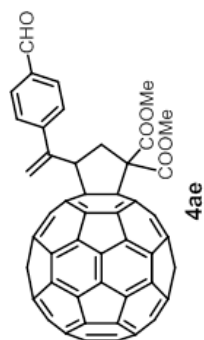

-9.929

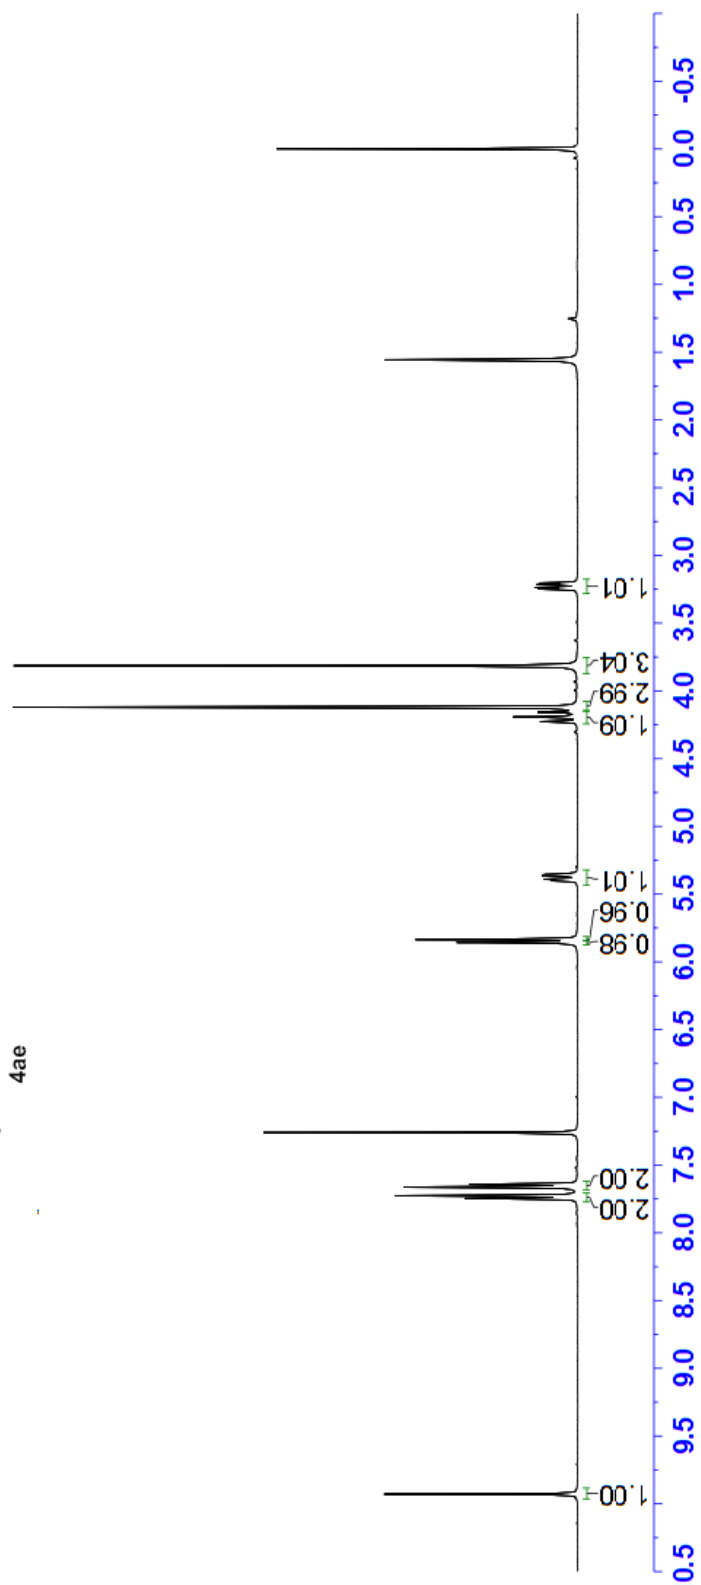

**$^{13}\text{C}$  NMR (150 MHz,  $\text{CDCl}_3$ ) of compound 4ae**

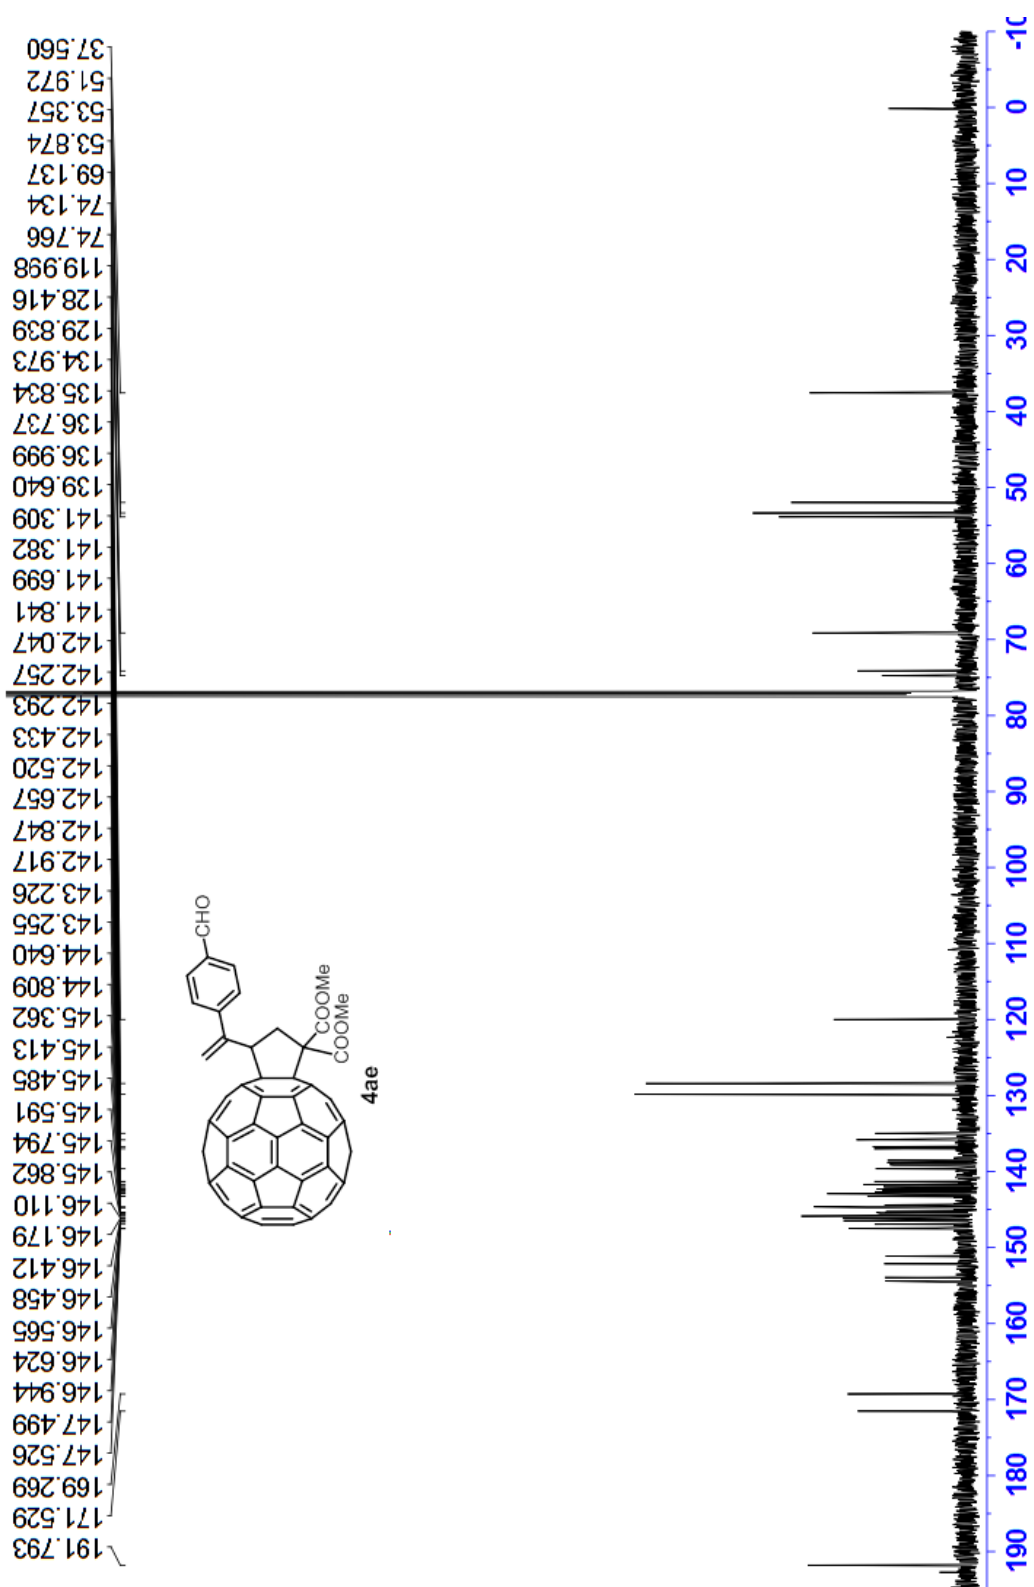

**$^1\text{H}$  NMR (400 MHz,  $\text{CDCl}_3$ ) of compound 4af**

7.472, 7.450, 7.260, 7.083, 7.062, 5.757, 5.718, 5.313, 5.303, 5.277, 5.267, 4.200, 4.165, 4.130, 4.106, 3.808, 3.215, 3.205, 3.181, 3.171

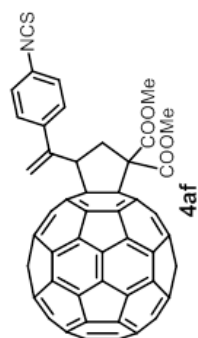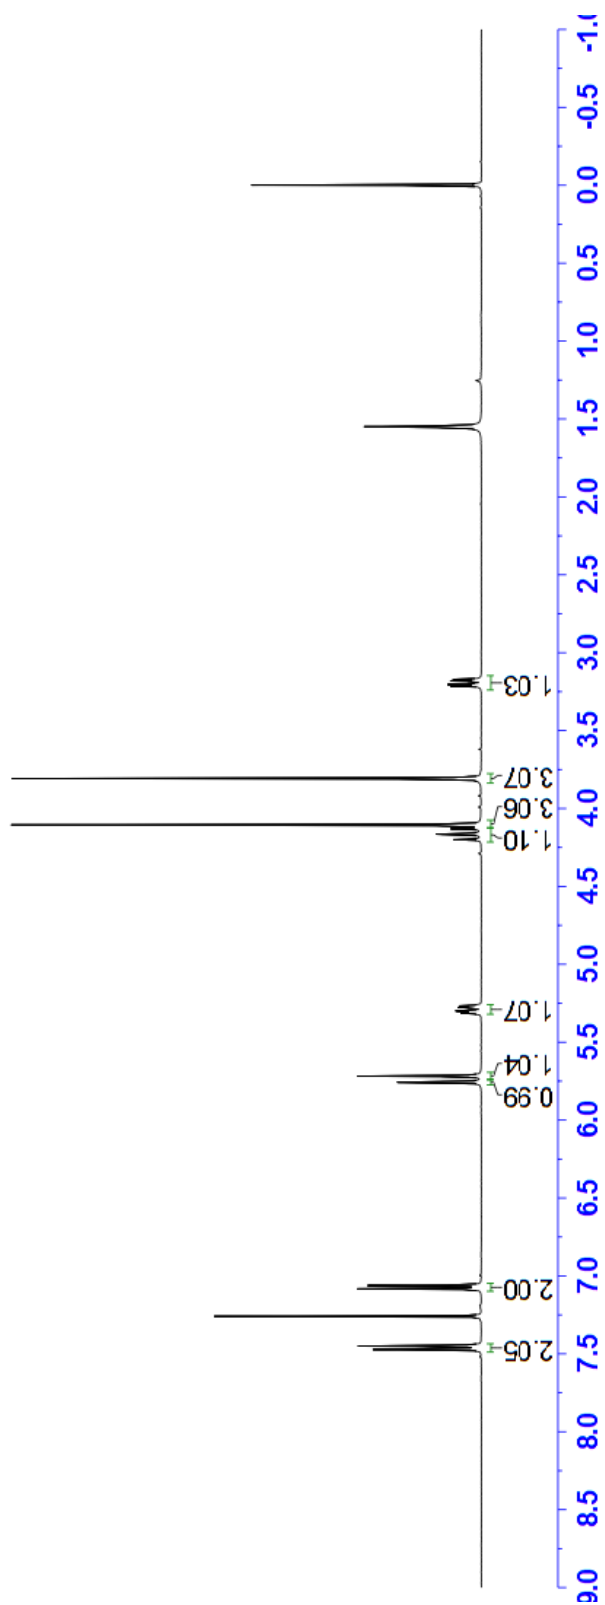

**$^{13}\text{C}$  NMR (150 MHz,  $\text{CDCl}_3$ ) of compound 4af**

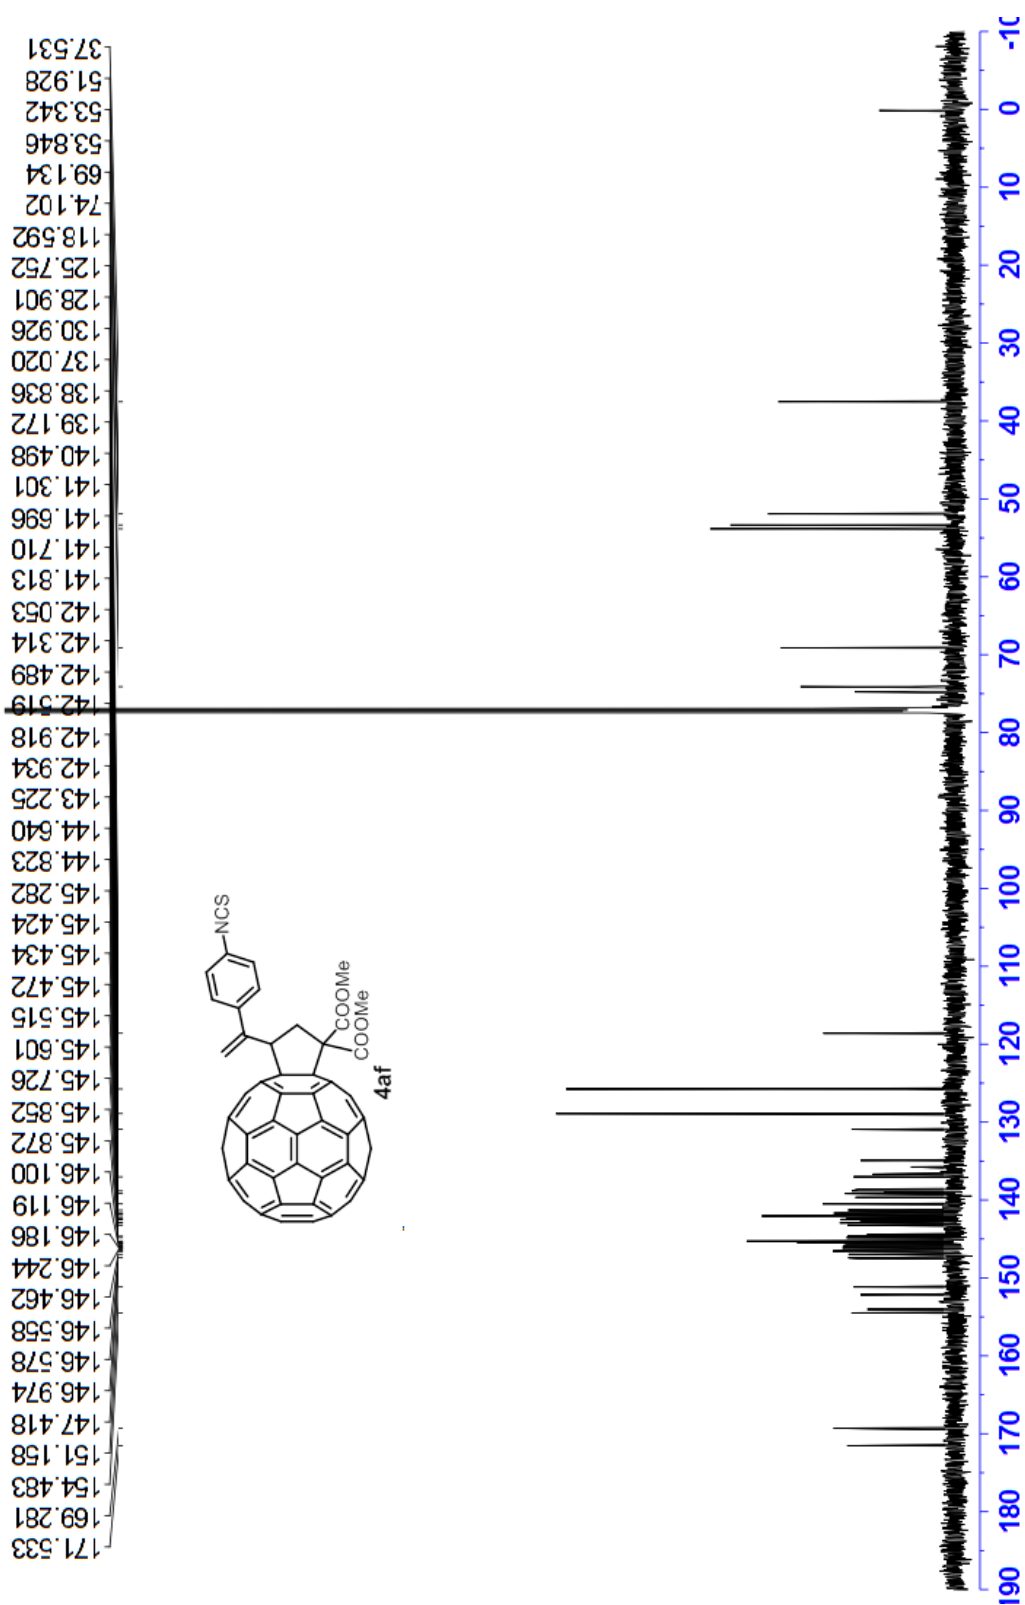

**$^1\text{H}$  NMR (400 MHz,  $\text{CDCl}_3$ ) of compound 4ag**

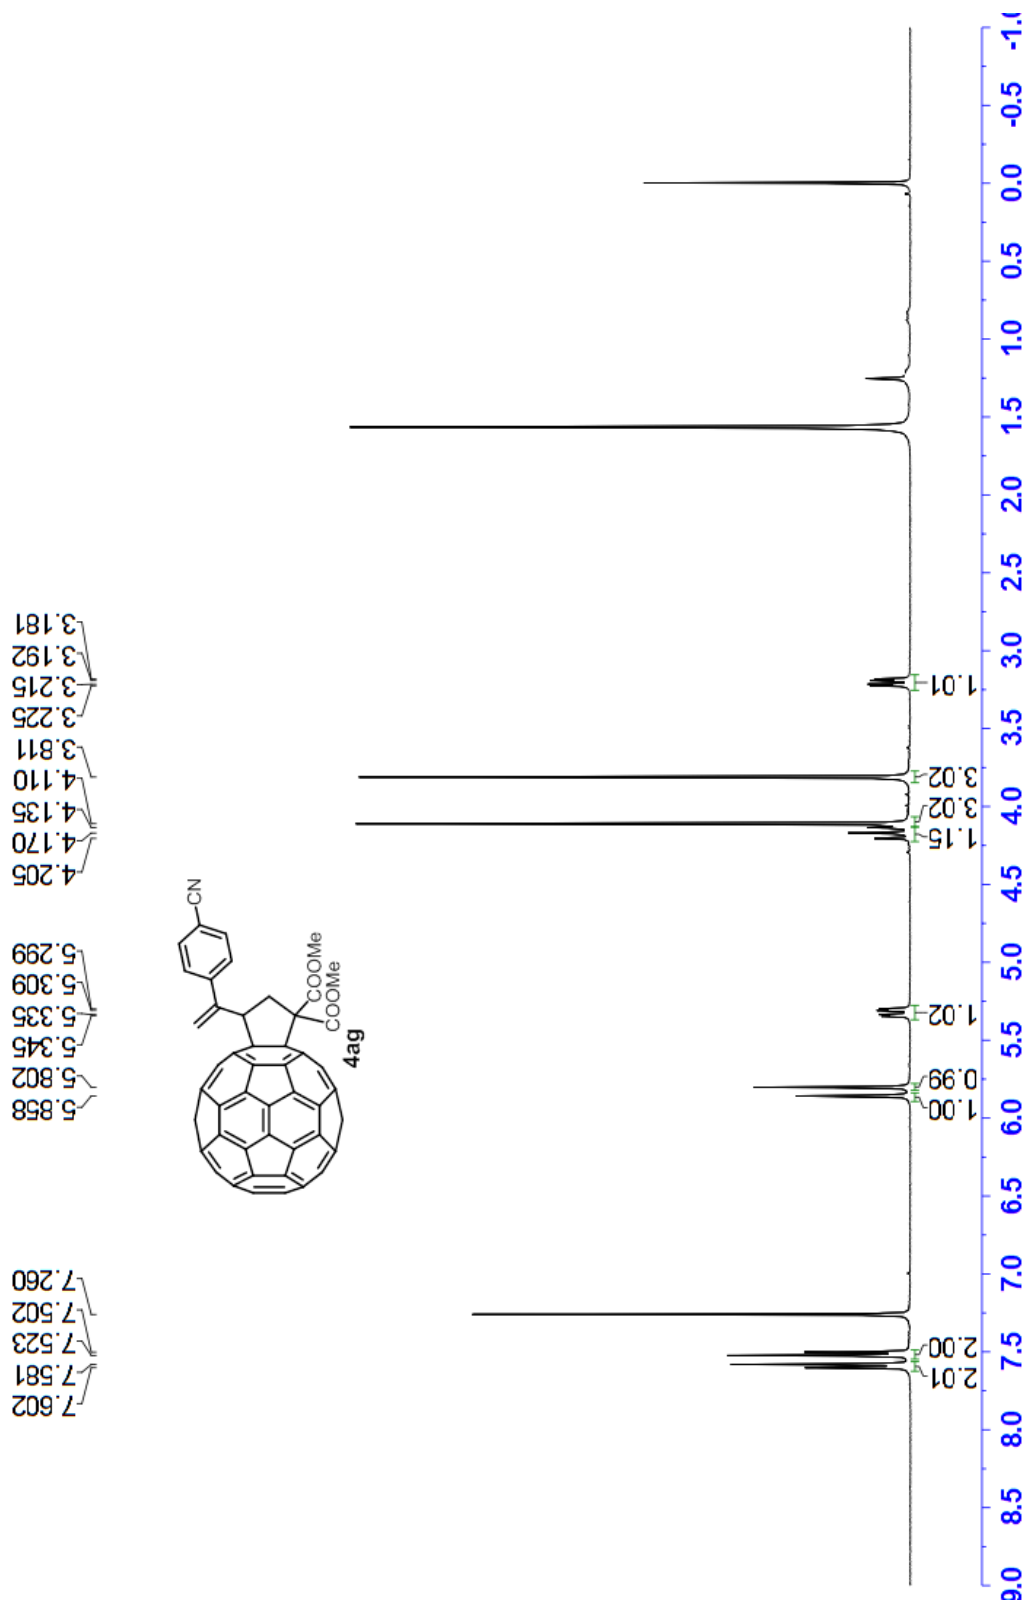

**$^{13}\text{C}$  NMR (150 MHz,  $\text{CDCl}_3$ ) of compound 4ag**

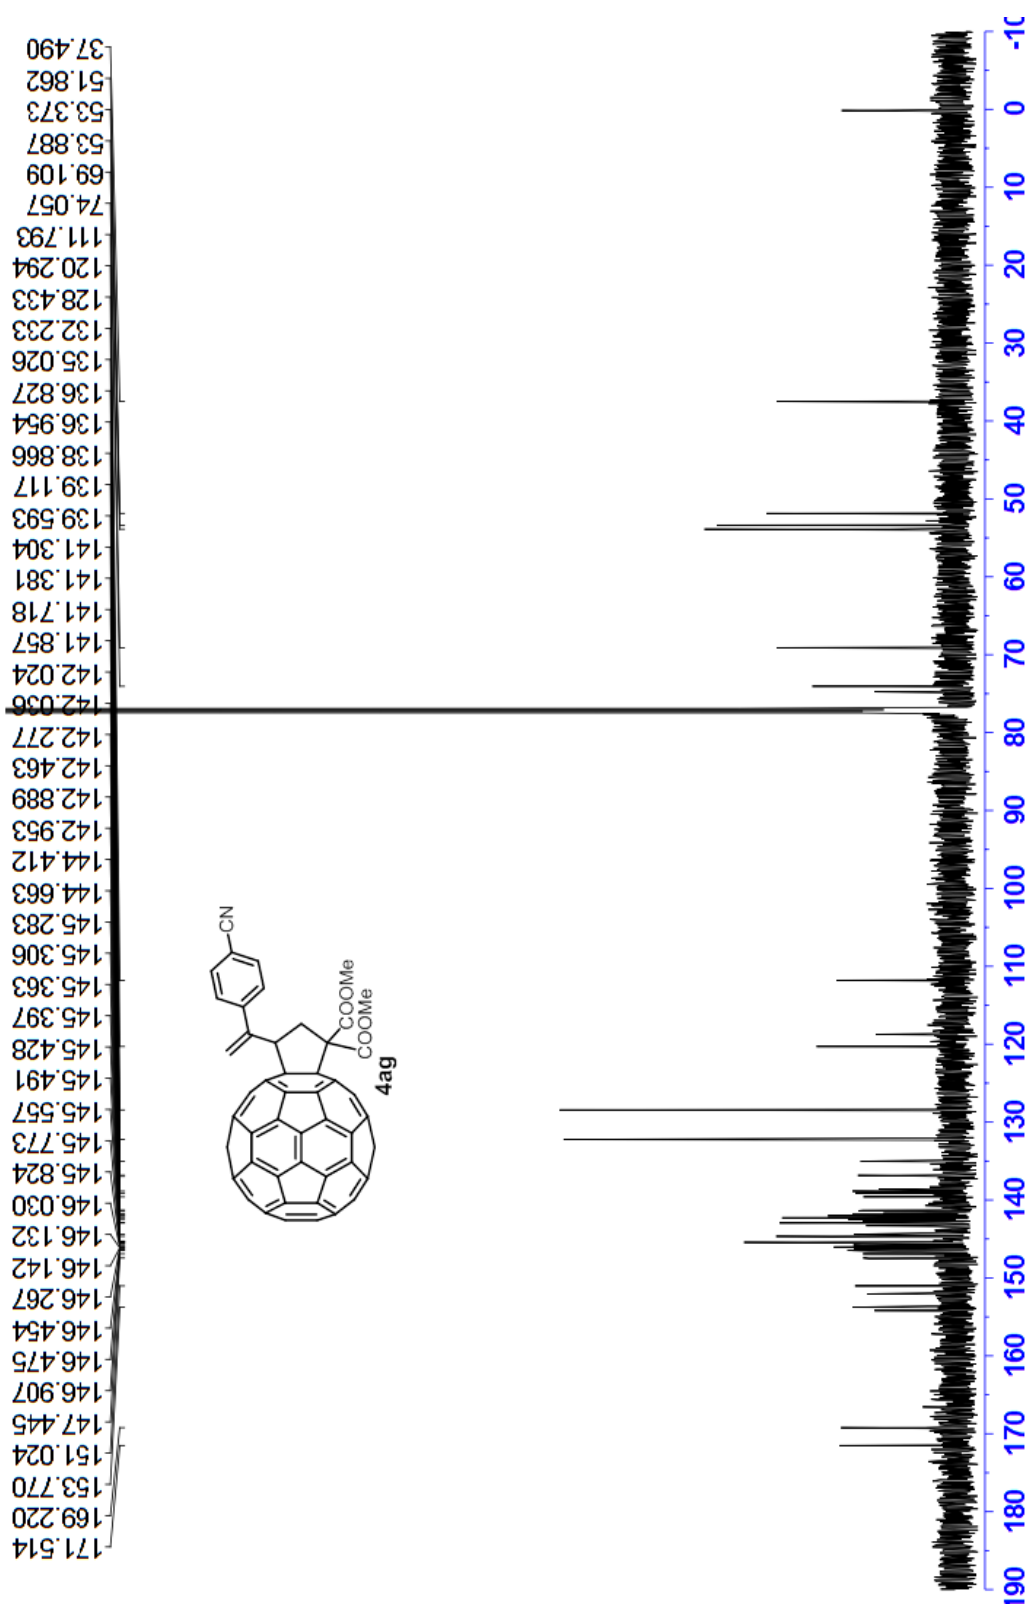

**$^1\text{H}$  NMR (400 MHz,  $\text{CDCl}_3$ ) of compound 4ah**

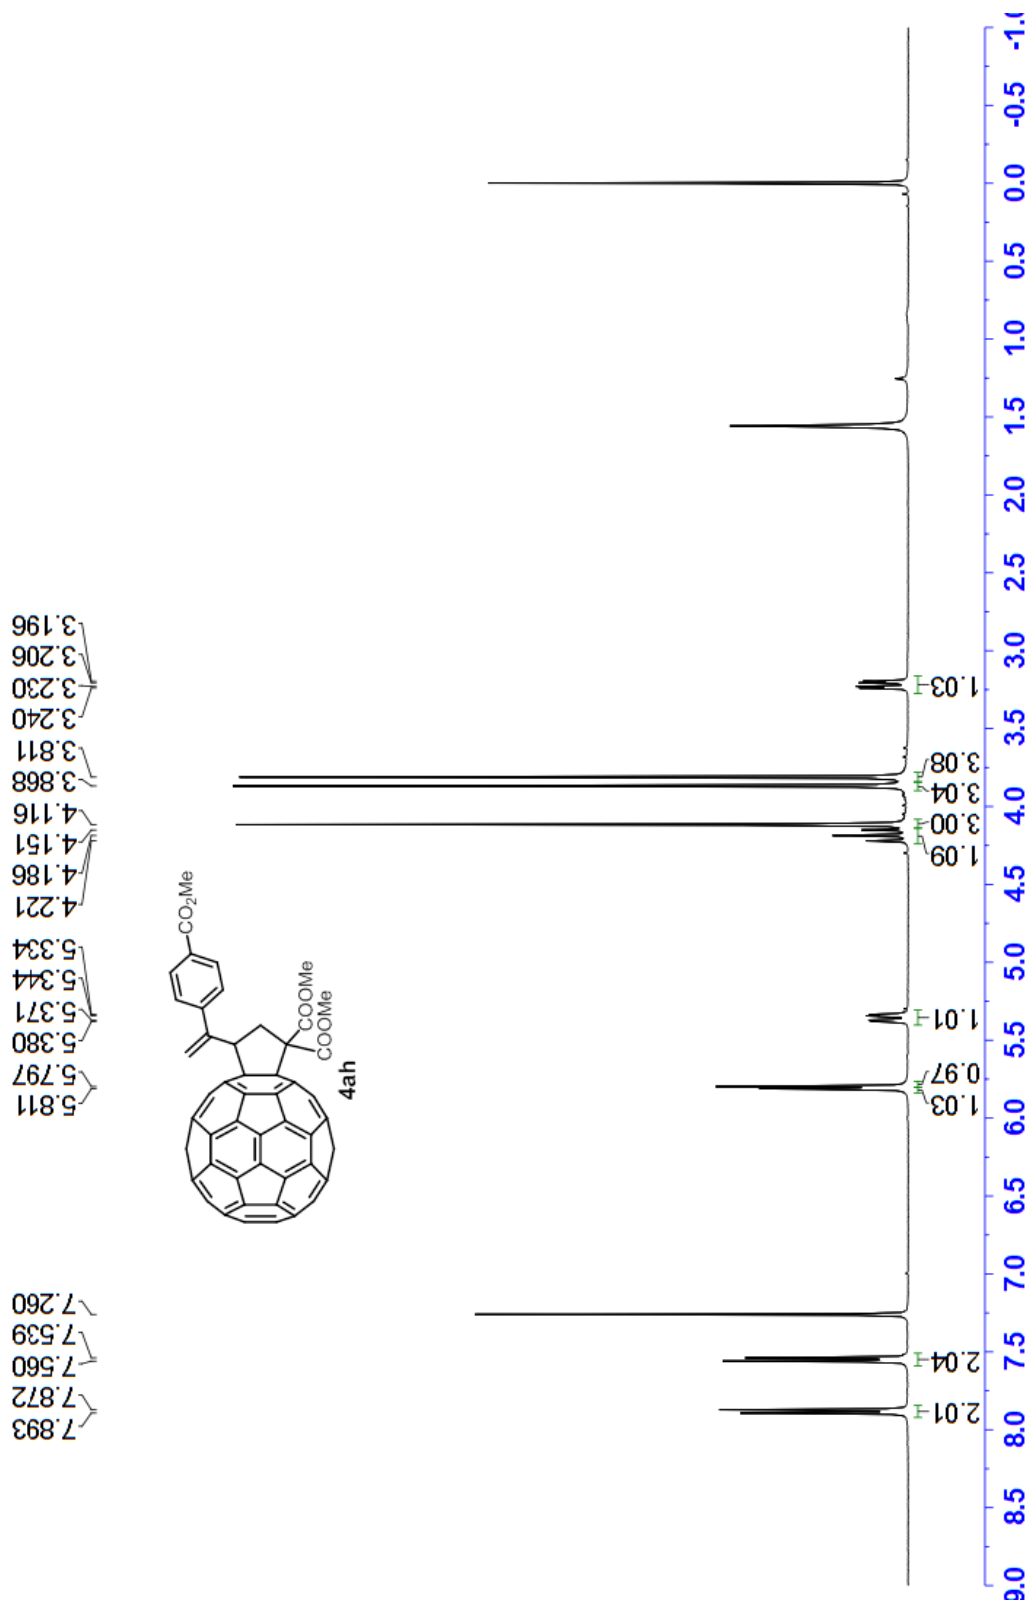



**<sup>13</sup>C NMR (150 MHz, CDCl<sub>3</sub>) of compound 4ah**

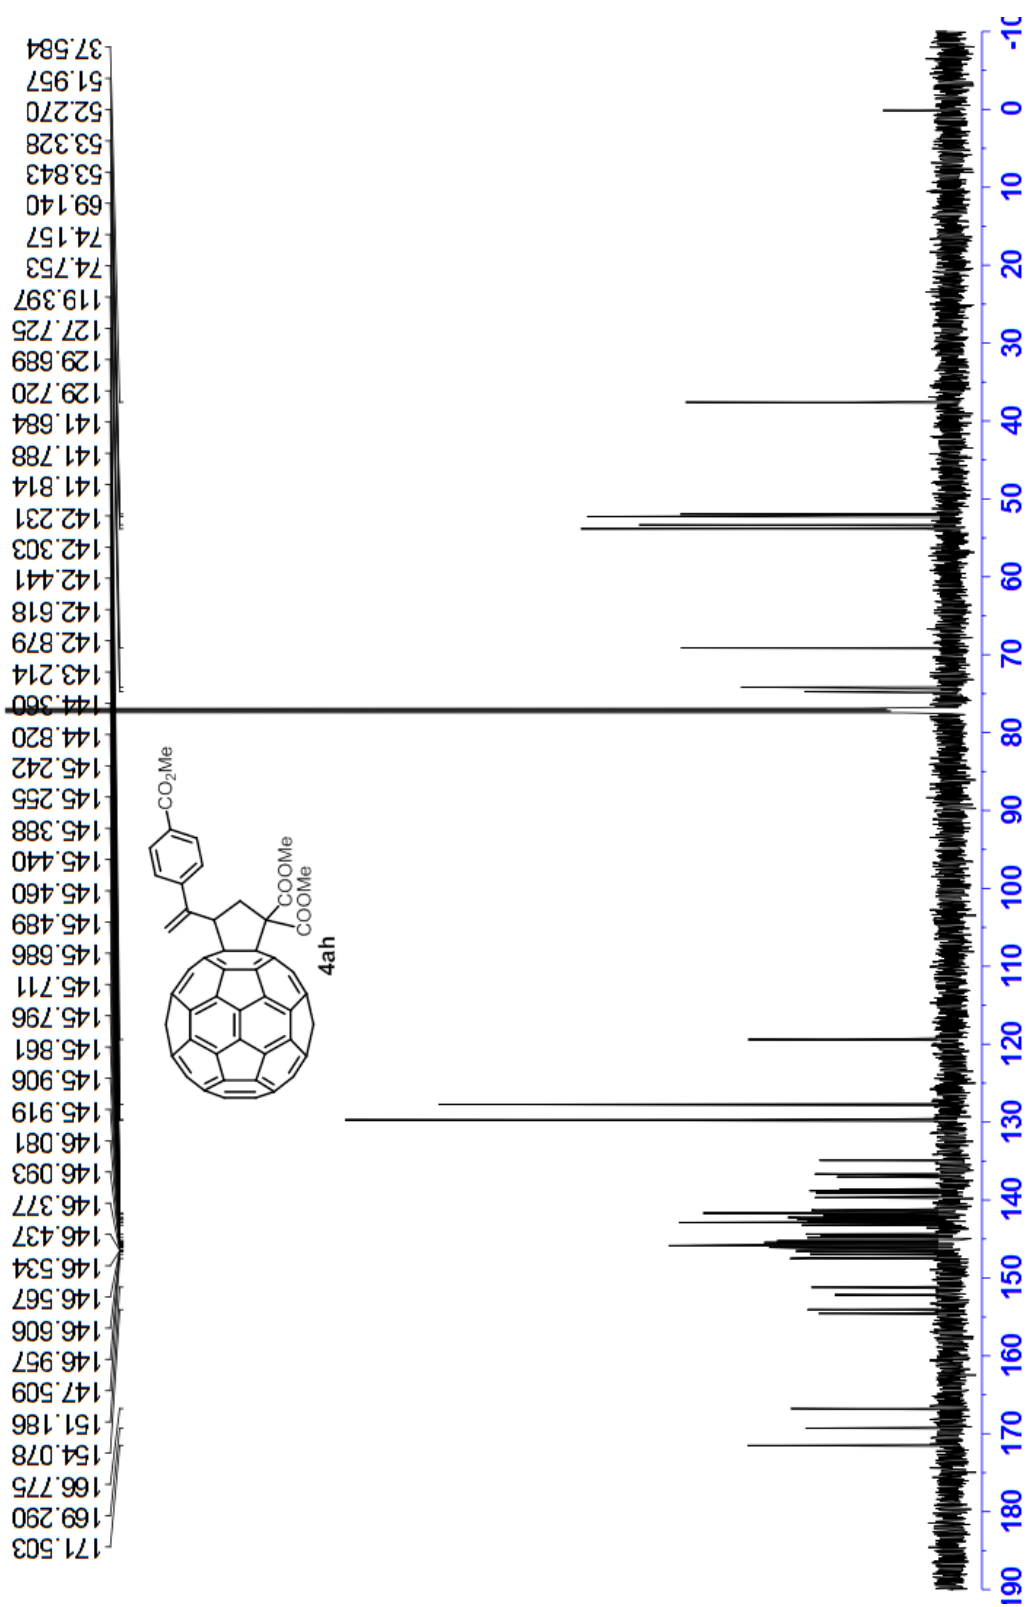

**<sup>1</sup>H NMR (600 MHz, CDCl<sub>3</sub>) of compound 4ai**

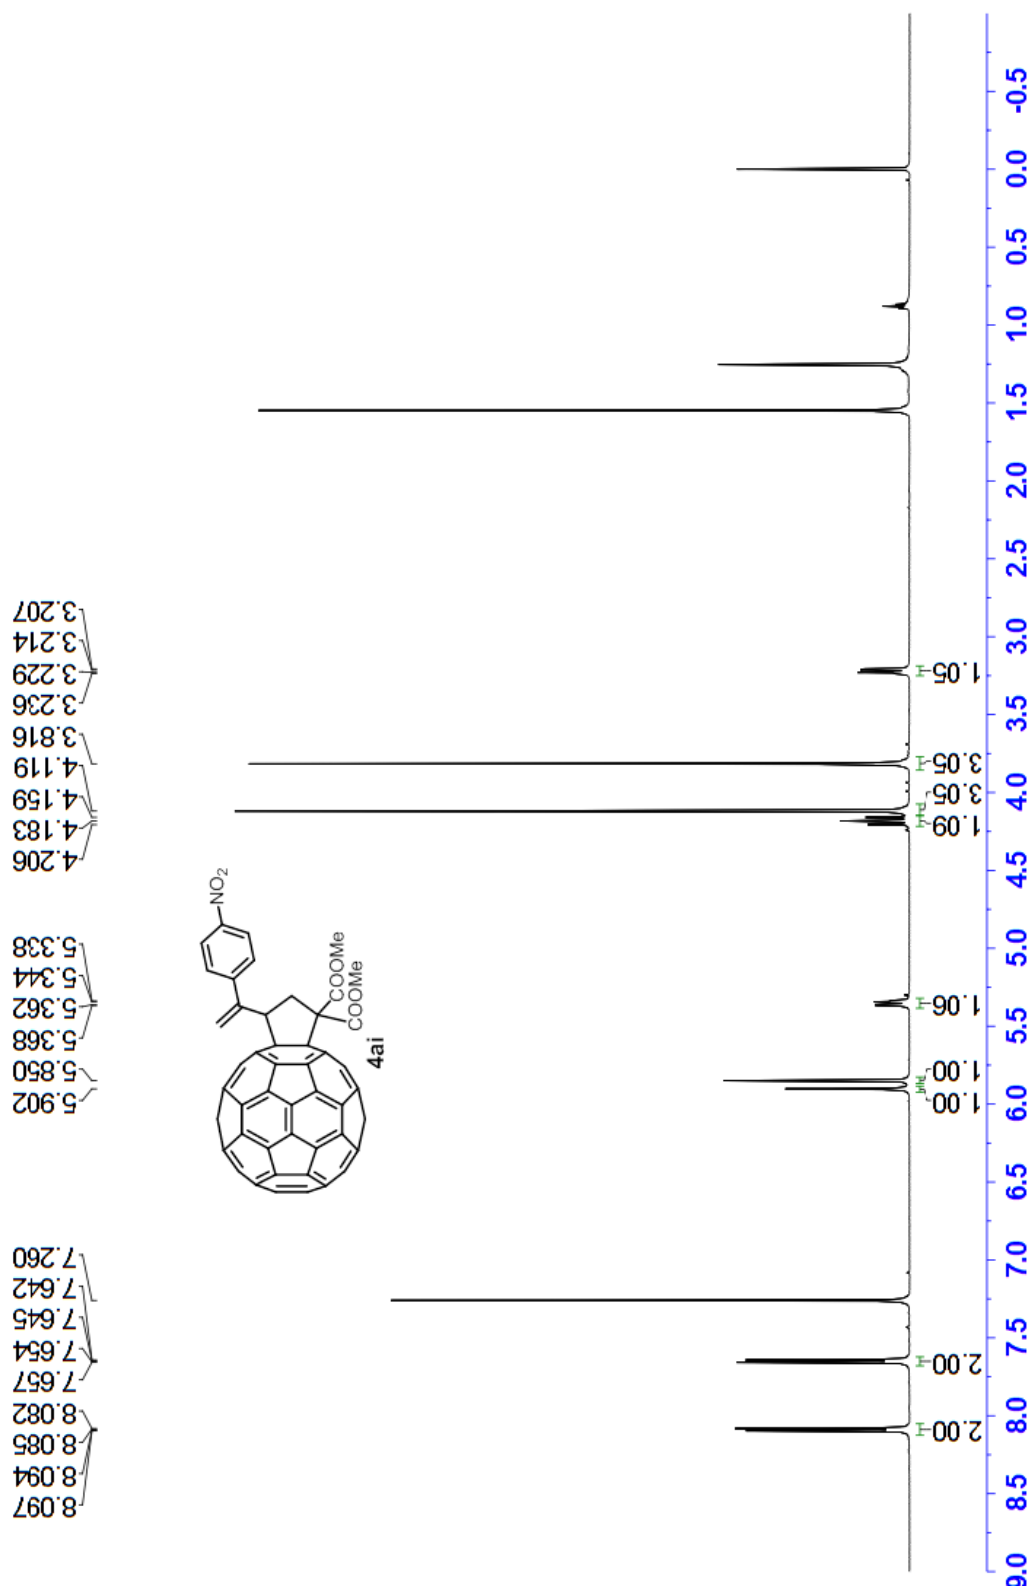

**<sup>13</sup>C NMR (150 MHz, CDCl<sub>3</sub>) of compound 4ai**

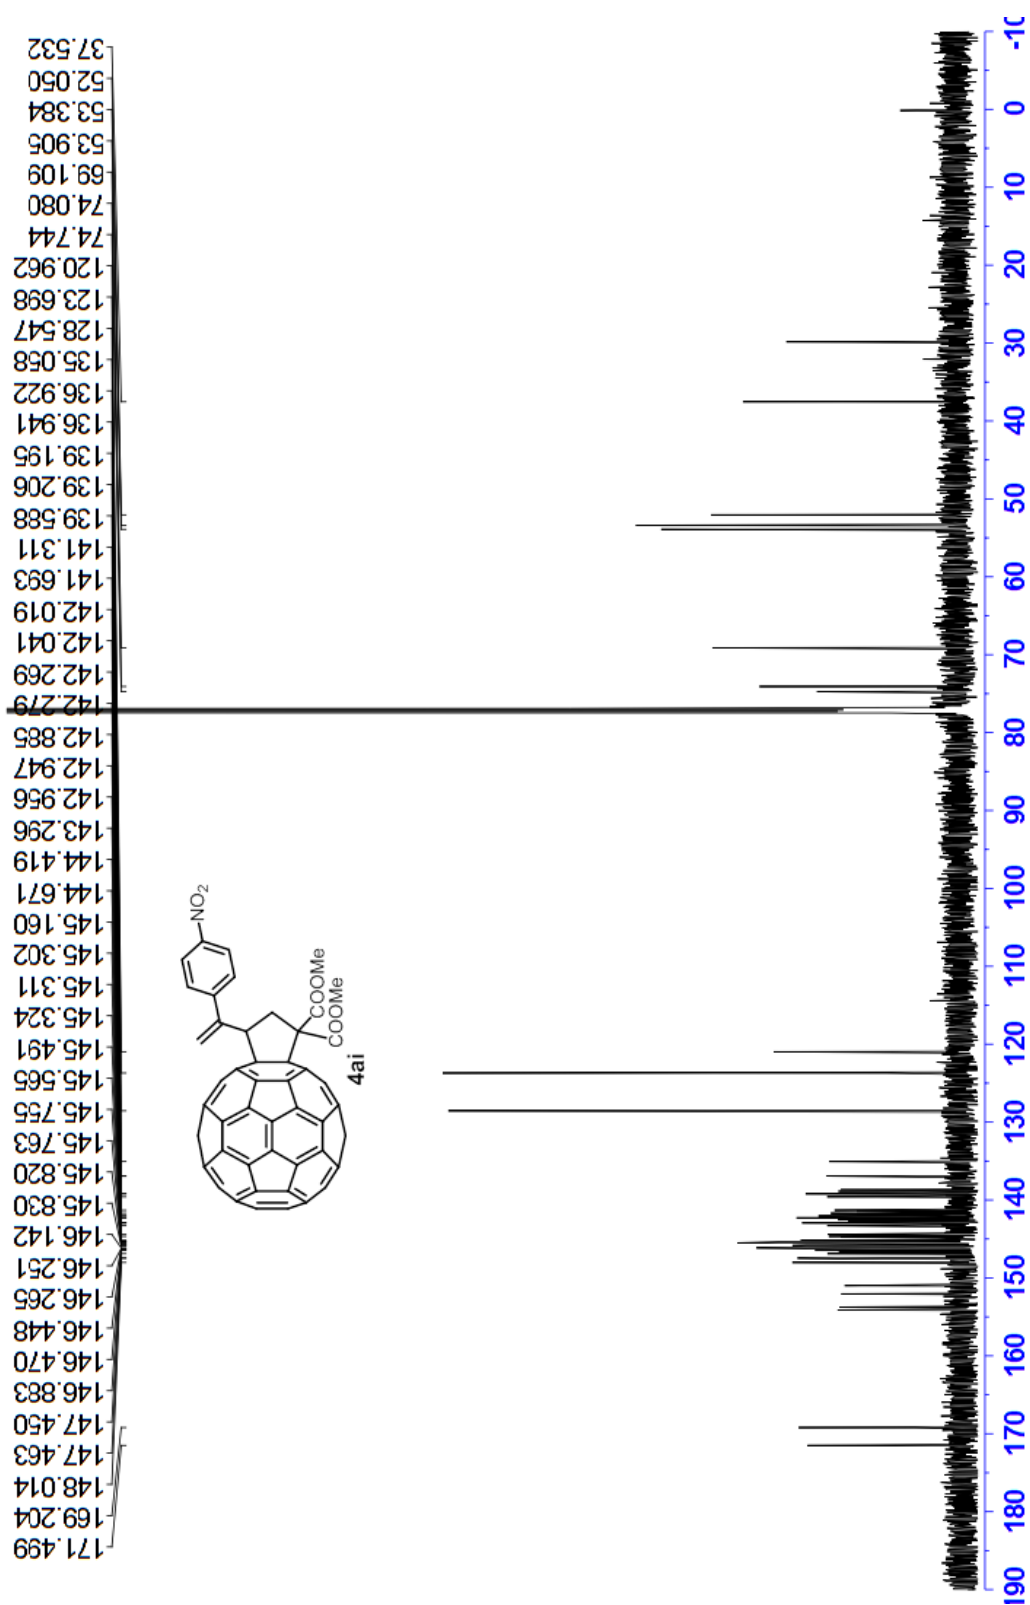

**<sup>1</sup>H NMR (600 MHz, CDCl<sub>3</sub>) of compound 4aj**

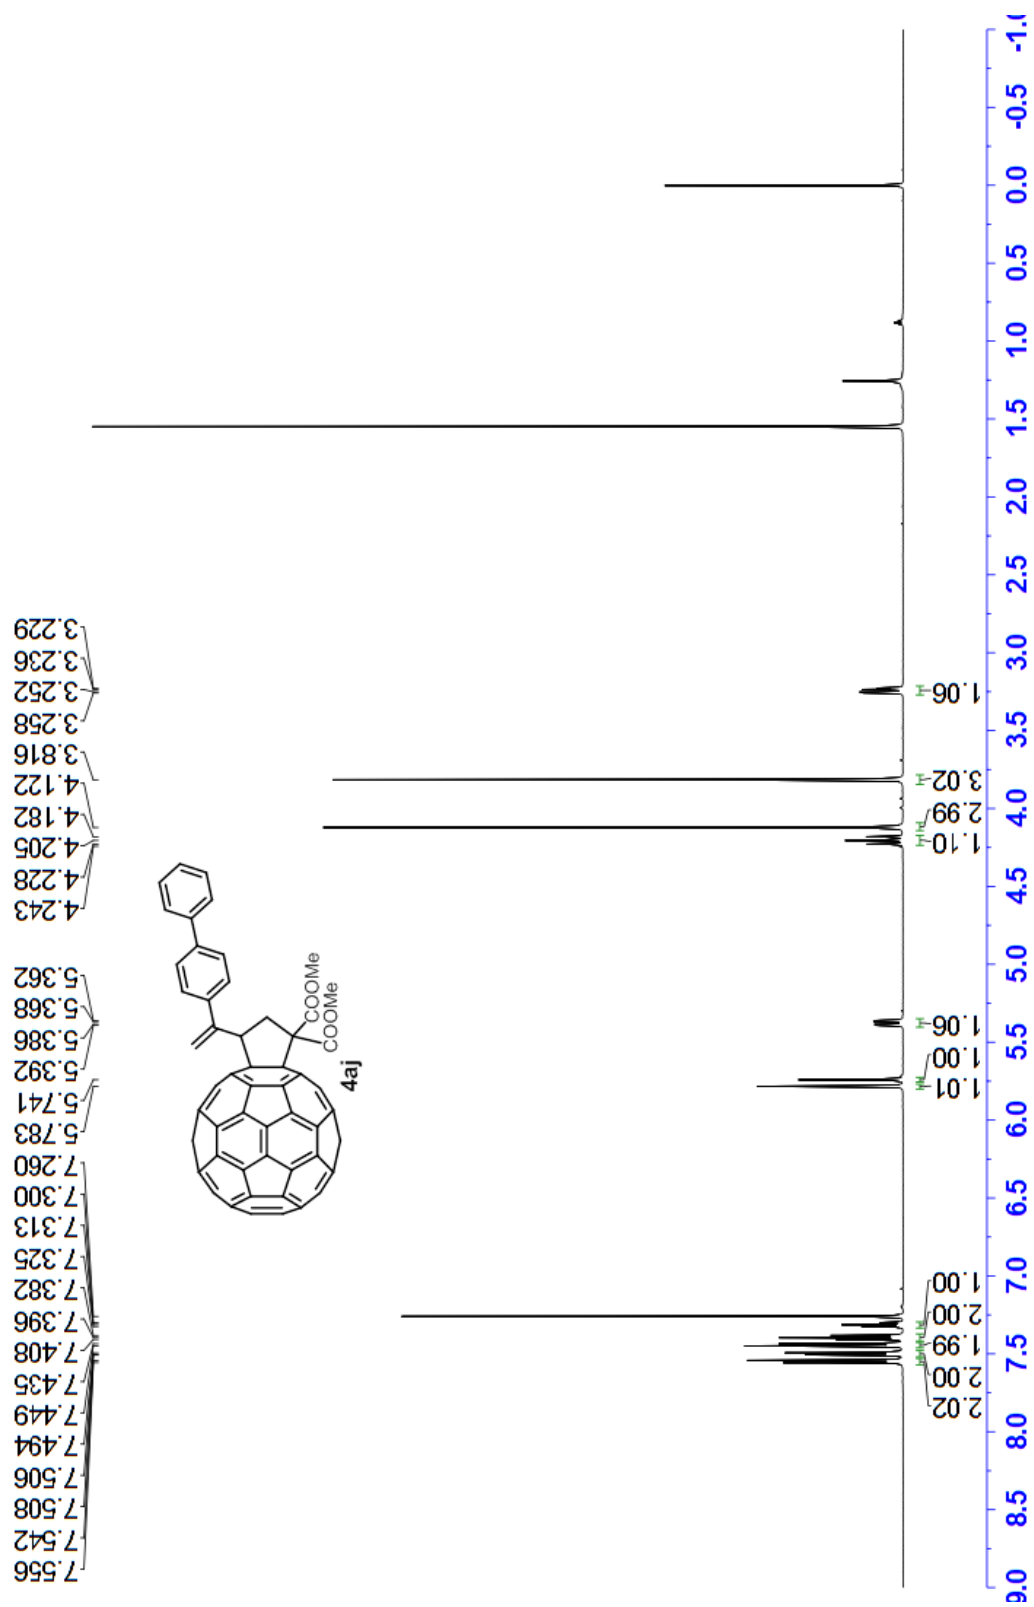



**<sup>1</sup>H NMR (600 MHz, CDCl<sub>3</sub>) of compound 4ak**

8.478, 8.470, 7.402, 7.393, 7.260, 5.894, 5.869, 5.334, 5.328, 5.310, 5.304, 4.201, 4.178, 4.155, 4.114, 3.814, 3.212, 3.206, 3.190, 3.183

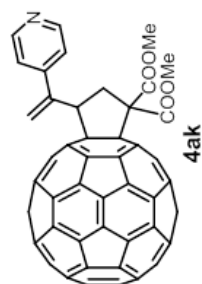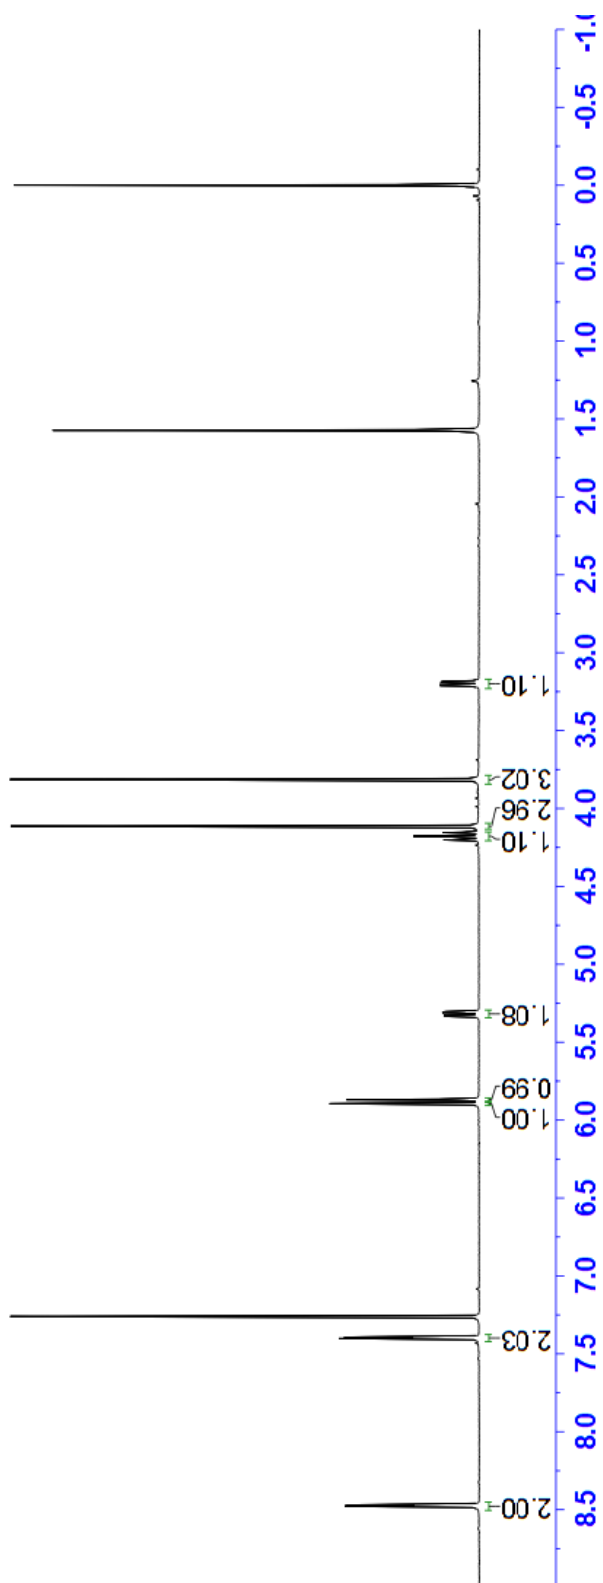

**<sup>13</sup>C NMR (150 MHz, CDCl<sub>3</sub>) of compound 4ak**

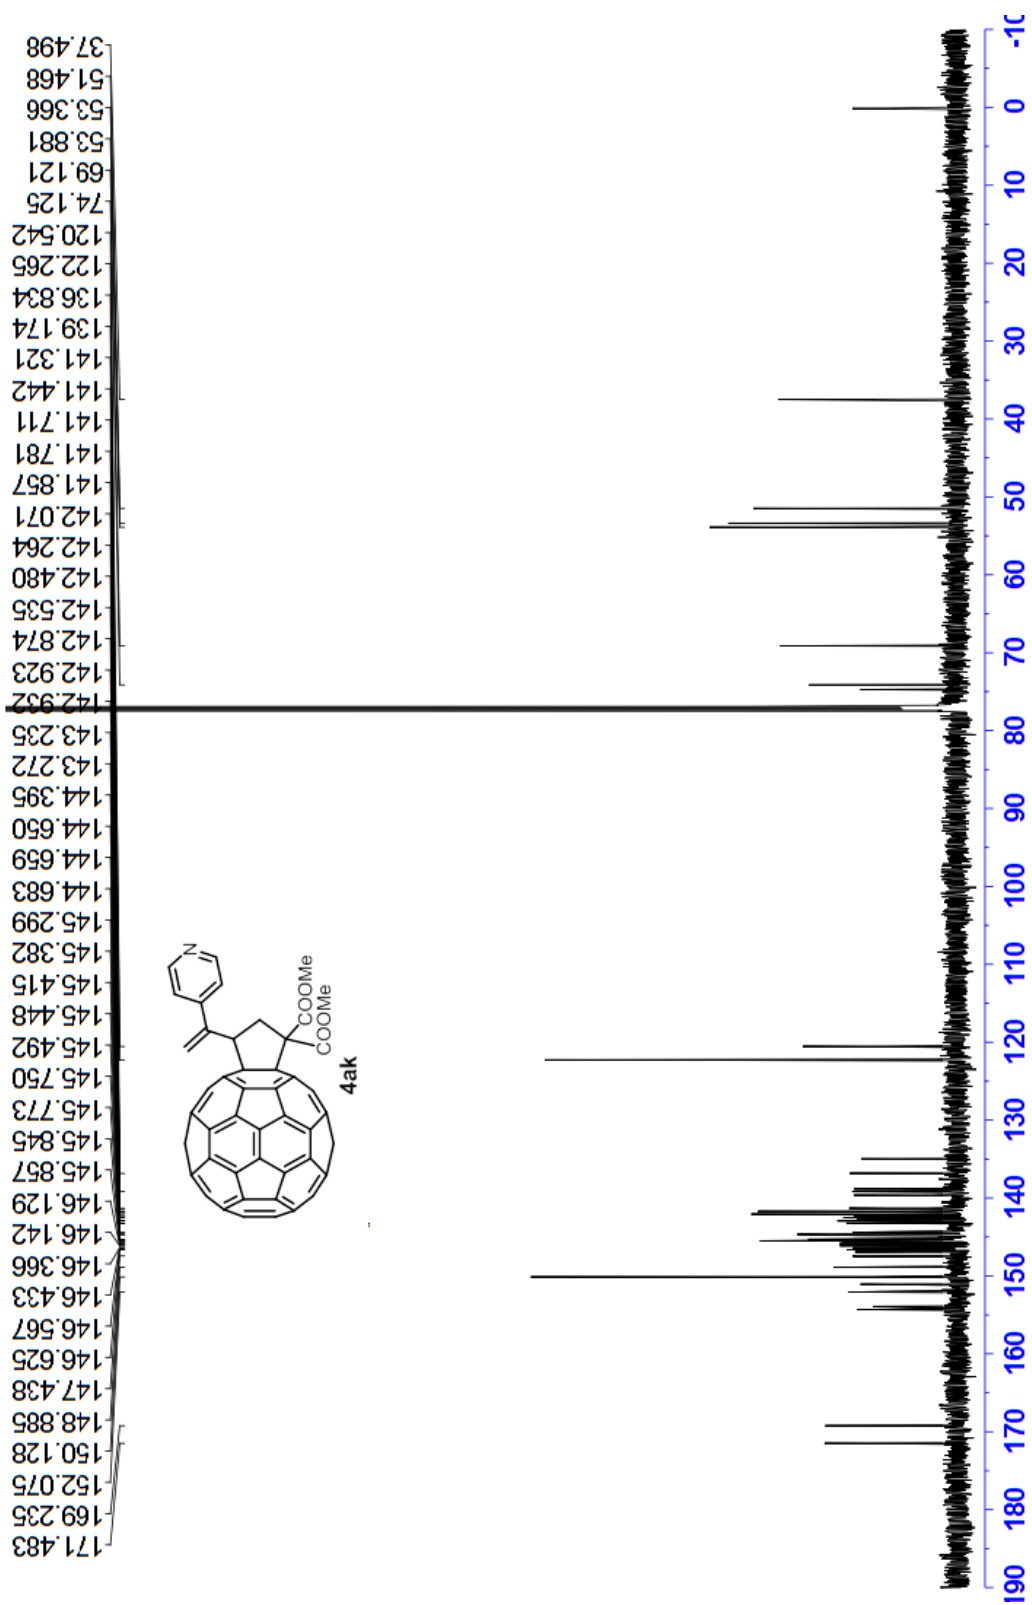

**<sup>1</sup>H NMR (400 MHz, CDCl<sub>3</sub>) of compound 4al**

8.845, 8.841, 8.834, 8.830, 7.948, 7.914, 7.909, 7.858, 7.355, 7.344, 7.334, 7.324, 5.877, 5.864, 5.495, 5.485, 5.459, 5.449, 4.269, 4.234, 4.199, 4.141, 3.820, 3.301, 3.291, 3.267, 3.257

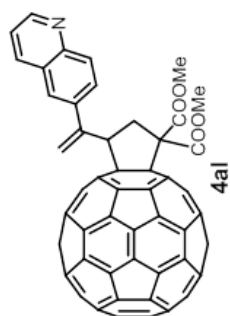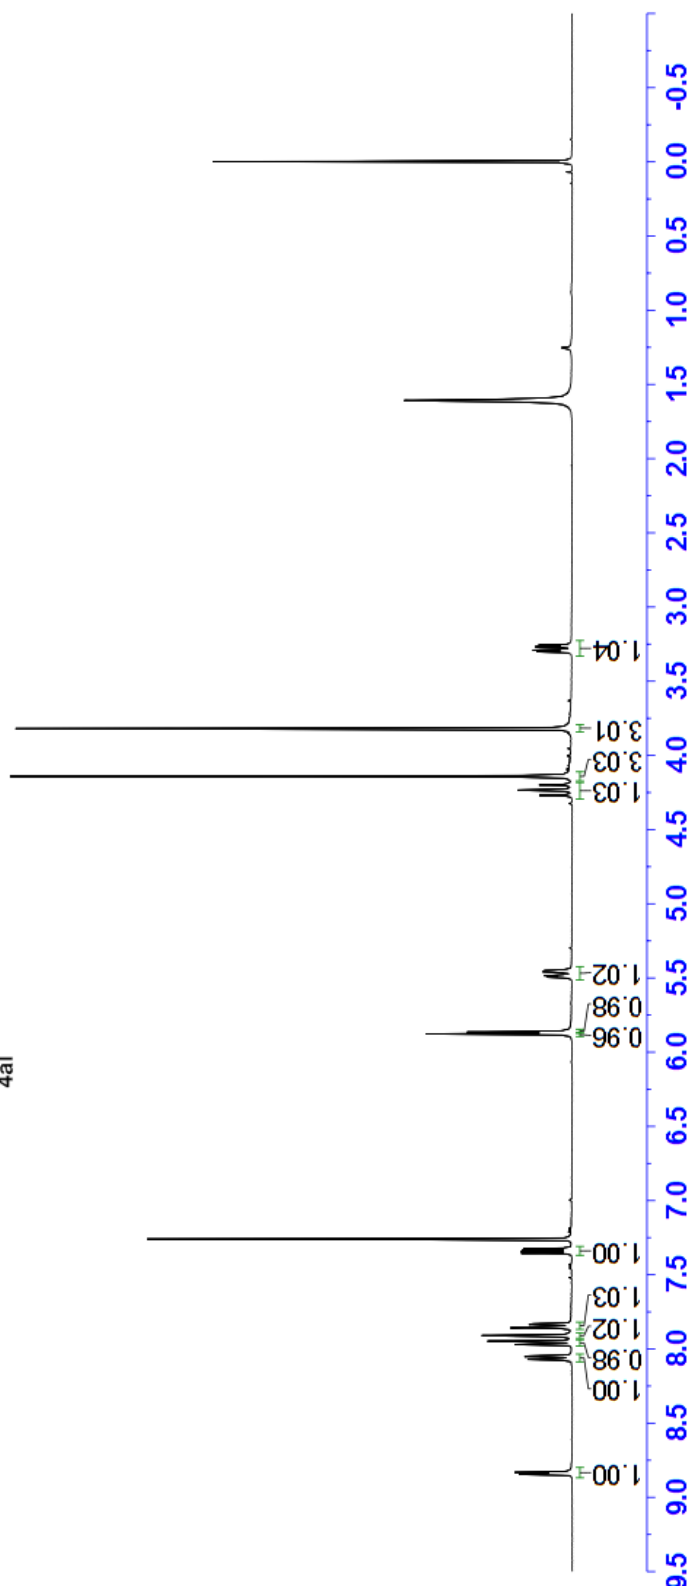



**<sup>13</sup>C NMR (150 MHz, CDCl<sub>3</sub>) of compound 4aI**

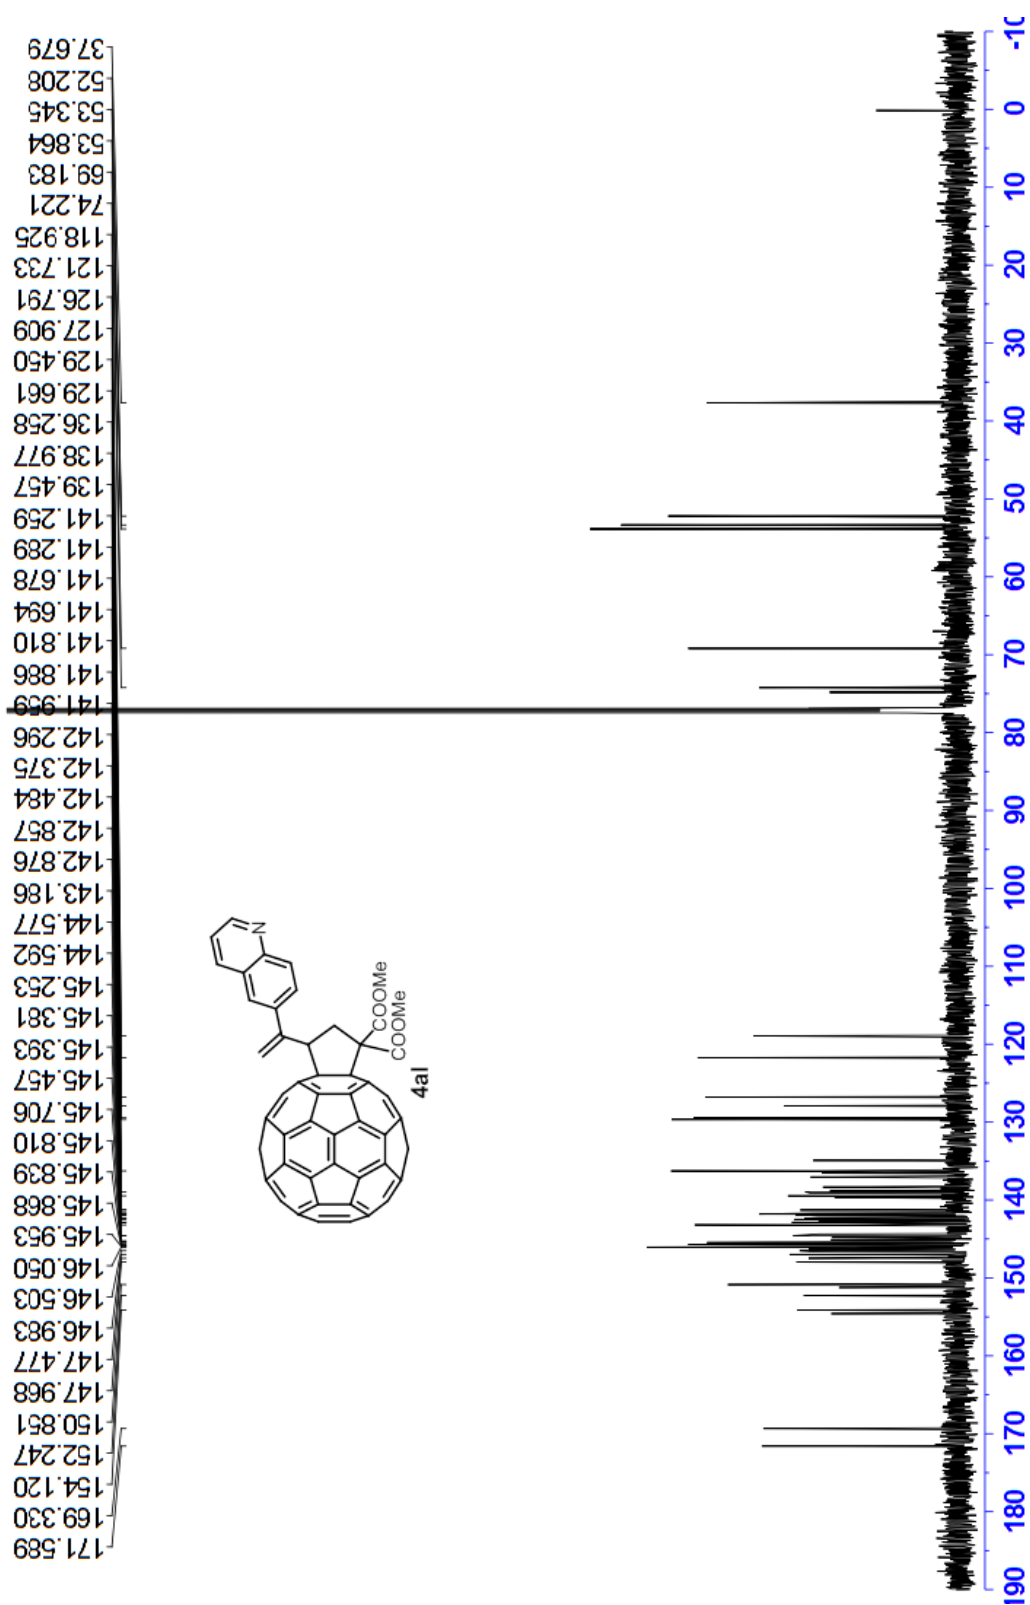

**$^1\text{H}$  NMR (600 MHz,  $\text{CDCl}_3/\text{CS}_2$ ) of compound 4am**

7.341, 7.339, 7.336, 7.334, 7.260, 7.198, 7.196, 7.190, 7.188, 7.167, 7.162, 7.159, 7.154, 5.785, 5.653, 5.219, 5.213, 5.194, 5.188, 4.182, 4.158, 4.135, 4.080, 3.801, 3.152, 3.145, 3.130, 3.123

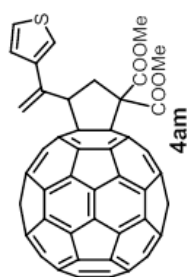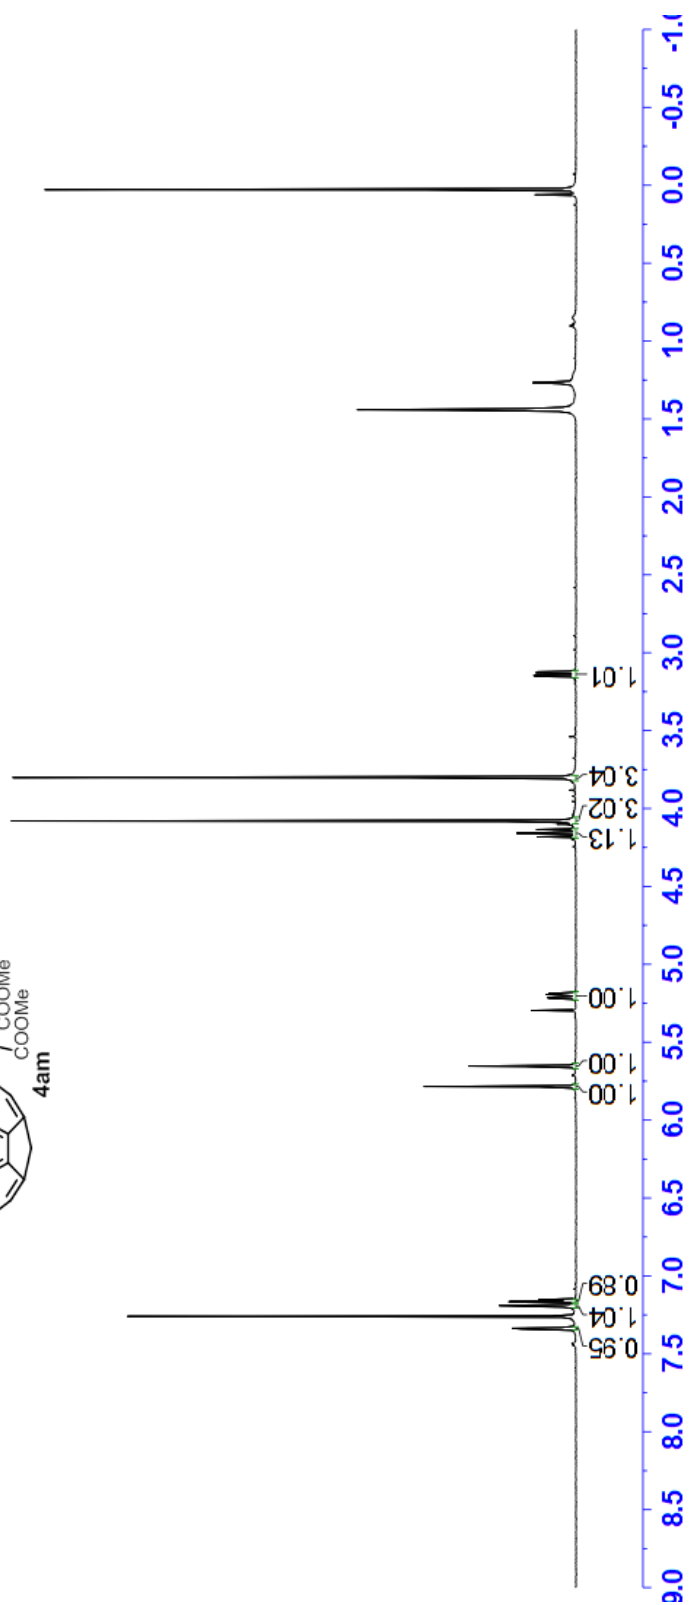

**$^{13}\text{C}$  NMR (150 MHz,  $\text{CDCl}_3/\text{CS}_2$ ) of compound 4am**

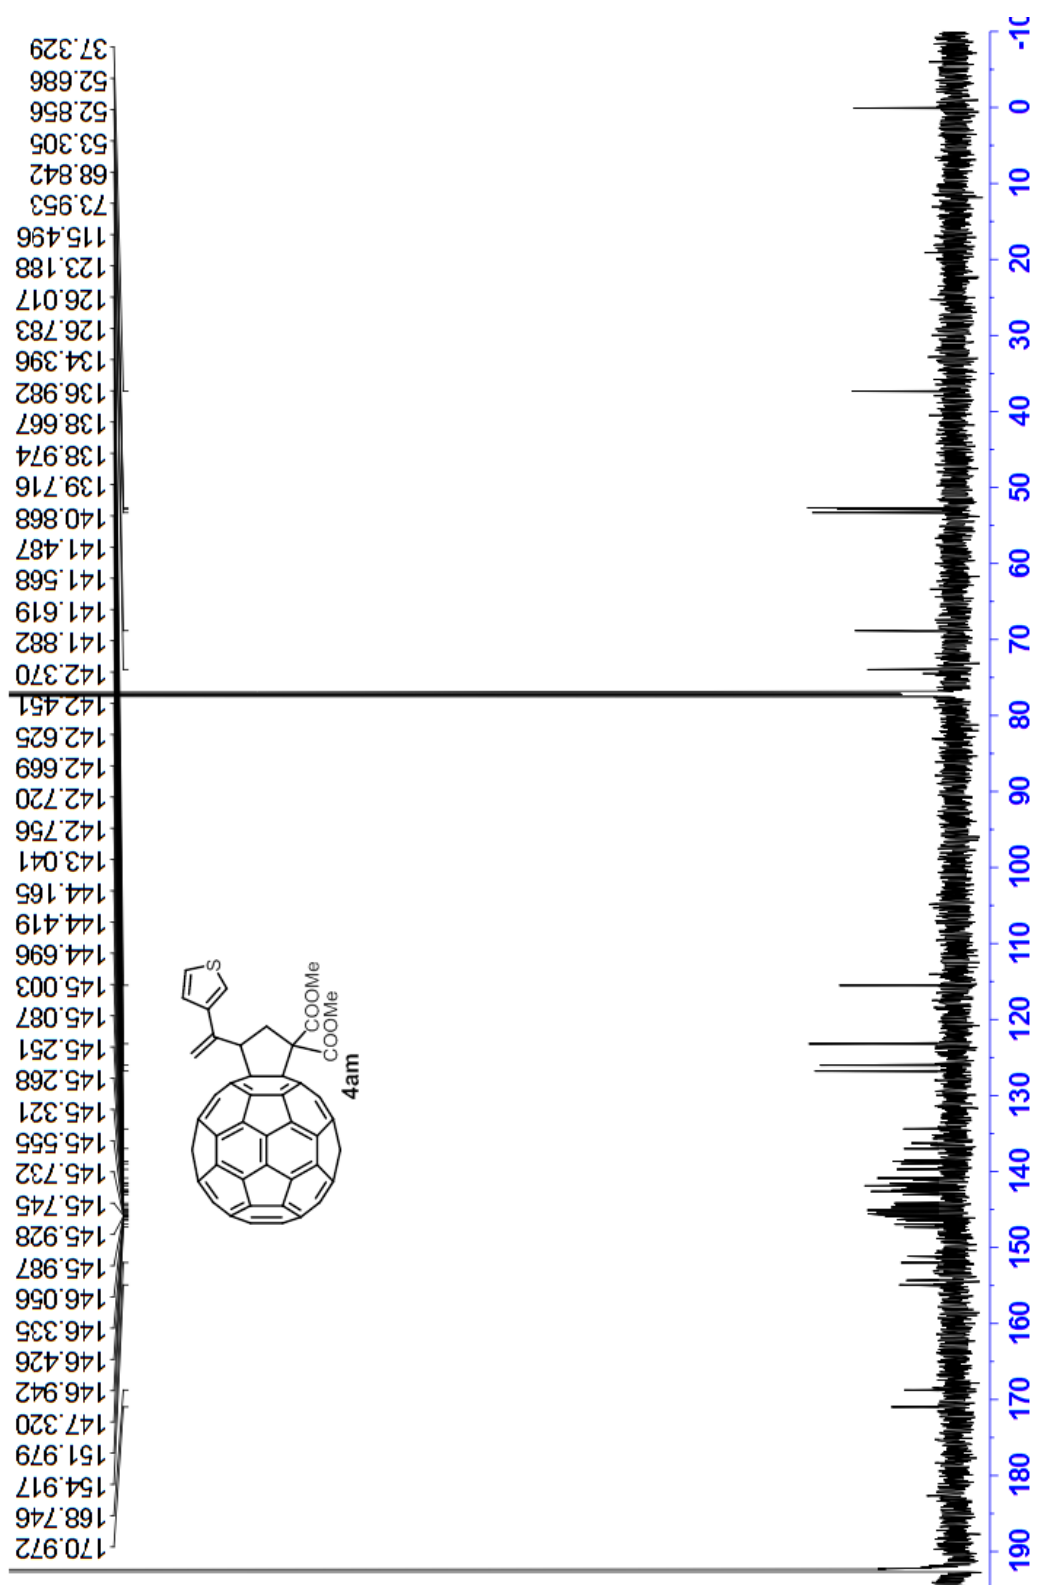

**<sup>1</sup>H NMR (600 MHz, CDCl<sub>3</sub>) of compound 4an**

7.260, 7.161, 7.154, 6.769, 6.762, 6.380, 5.914, 5.200, 5.193, 5.175, 5.169, 4.235, 4.212, 4.188, 4.079, 3.815, 3.144, 3.137, 3.121, 3.114, -9.562

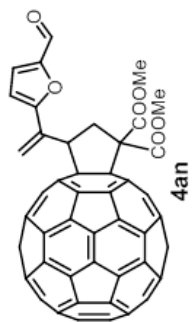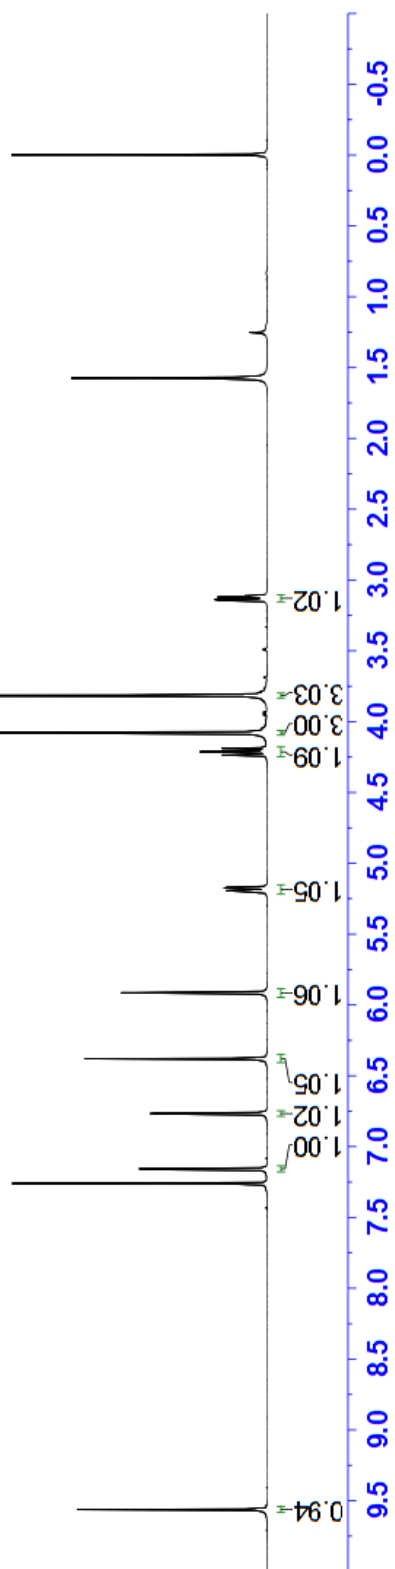



**$^1\text{H}$  NMR (400 MHz,  $\text{CDCl}_3$ ) of compound 4ao**

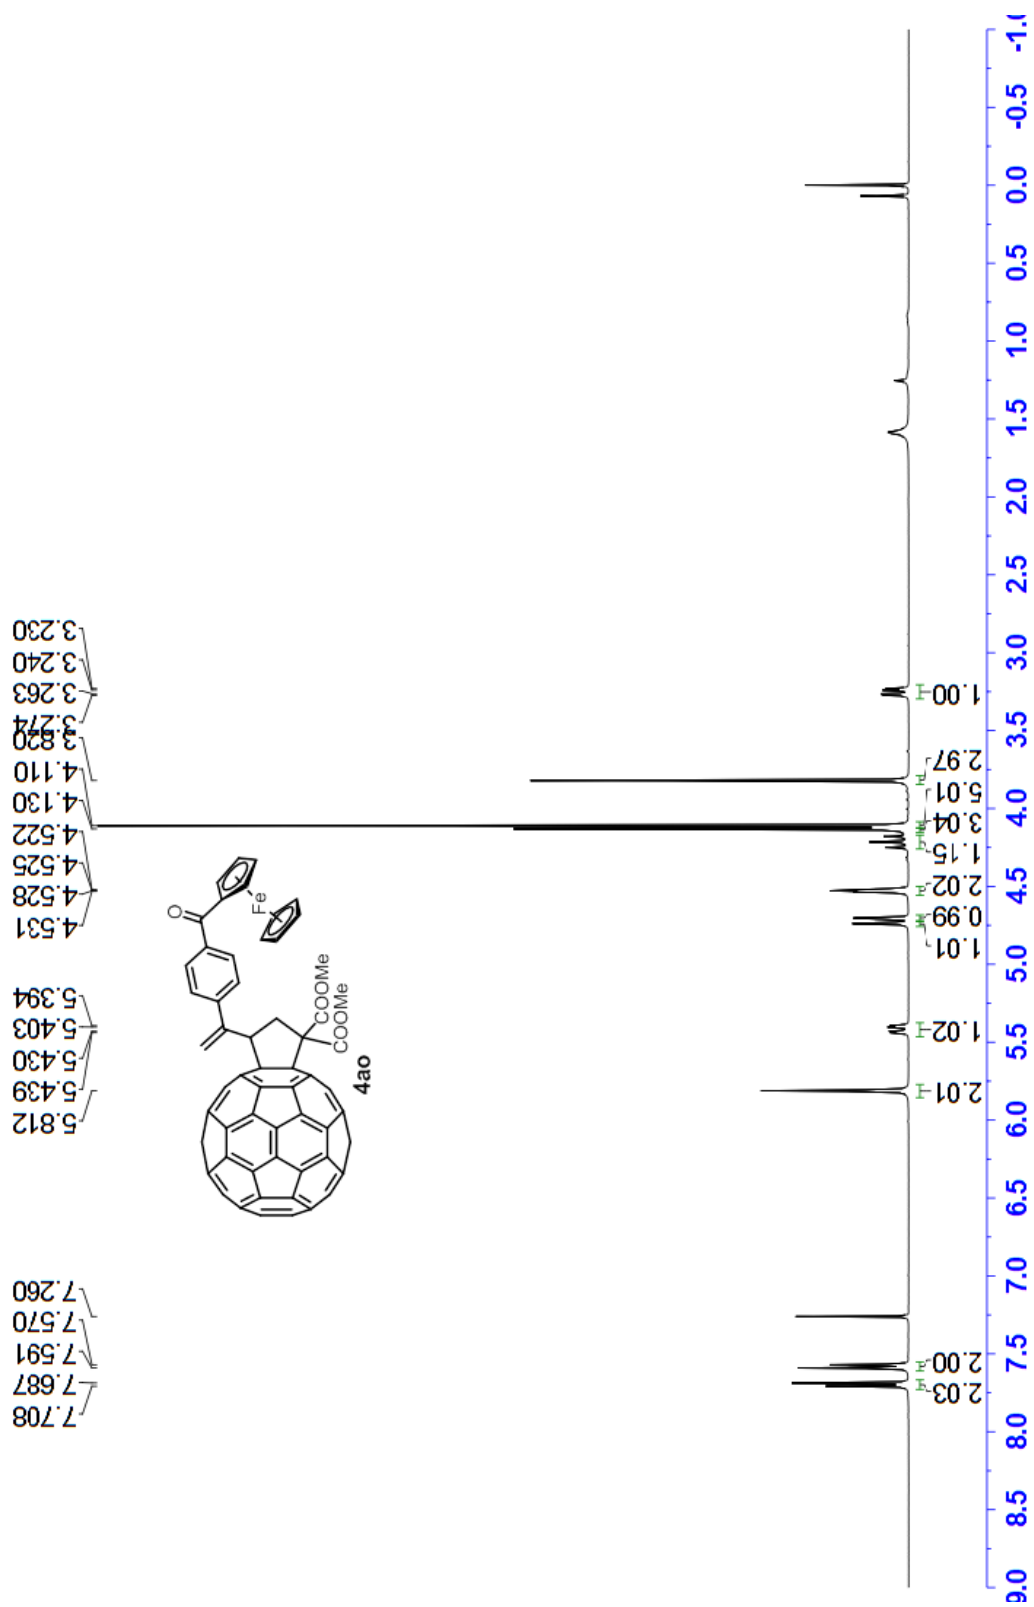

**$^{13}\text{C}$  NMR (150 MHz,  $\text{CDCl}_3$ ) of compound 4ao**

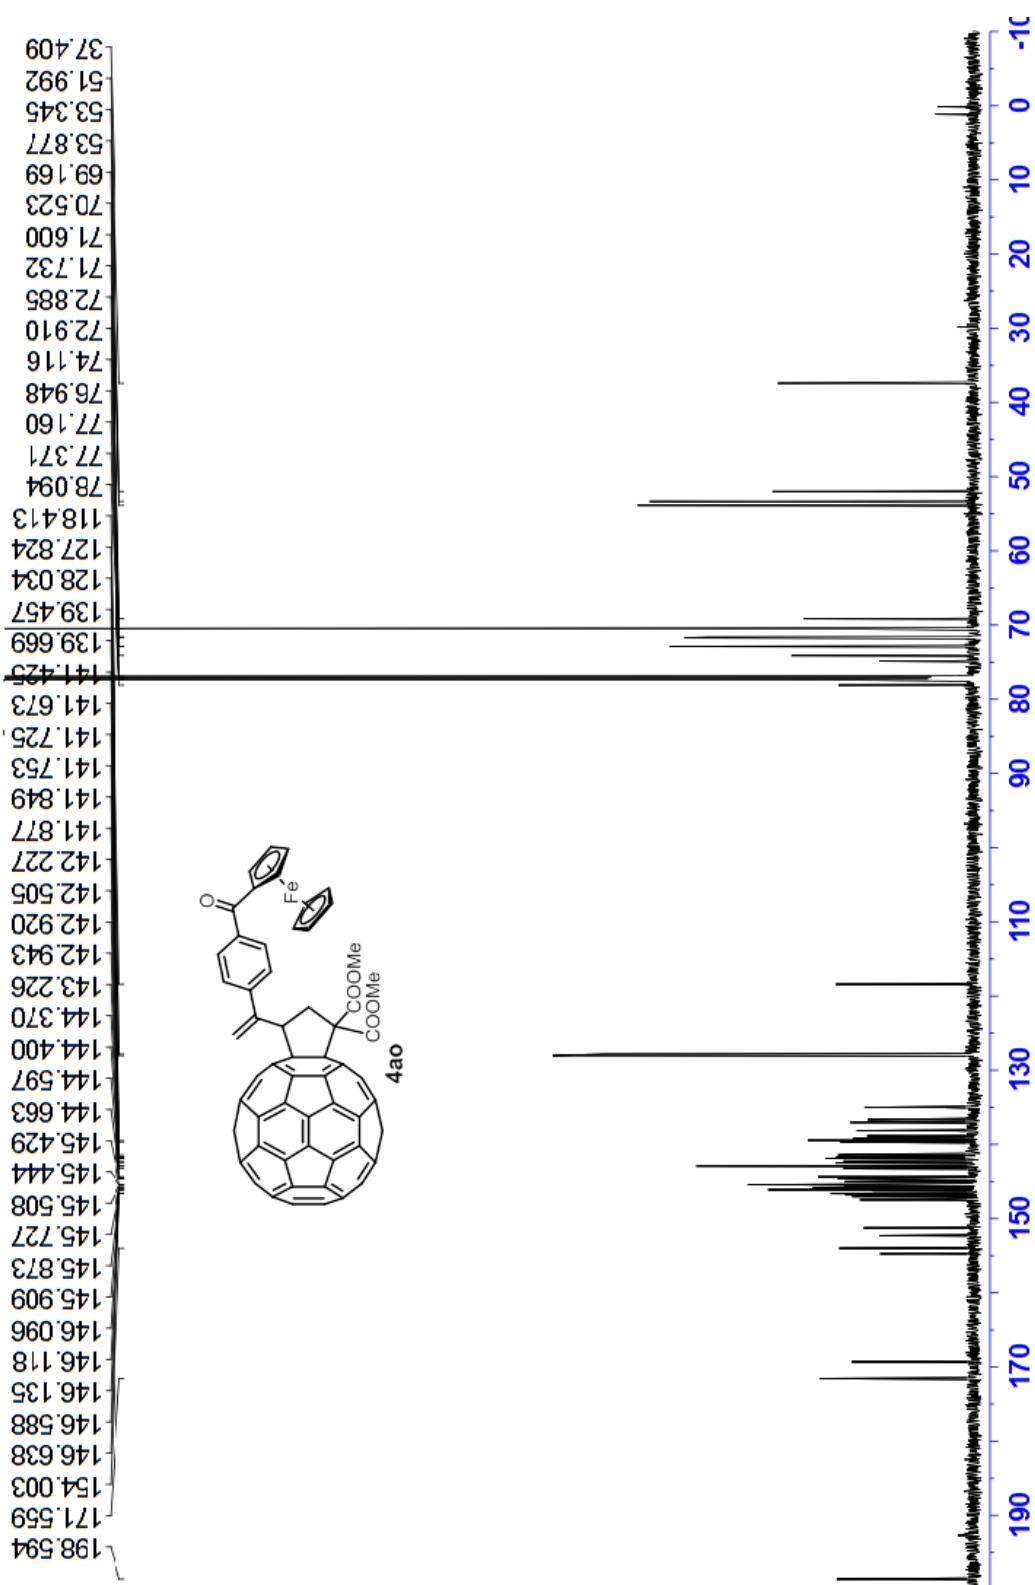

**$^1\text{H}$  NMR (400 MHz,  $\text{CDCl}_3$ ) of compound 4ap**

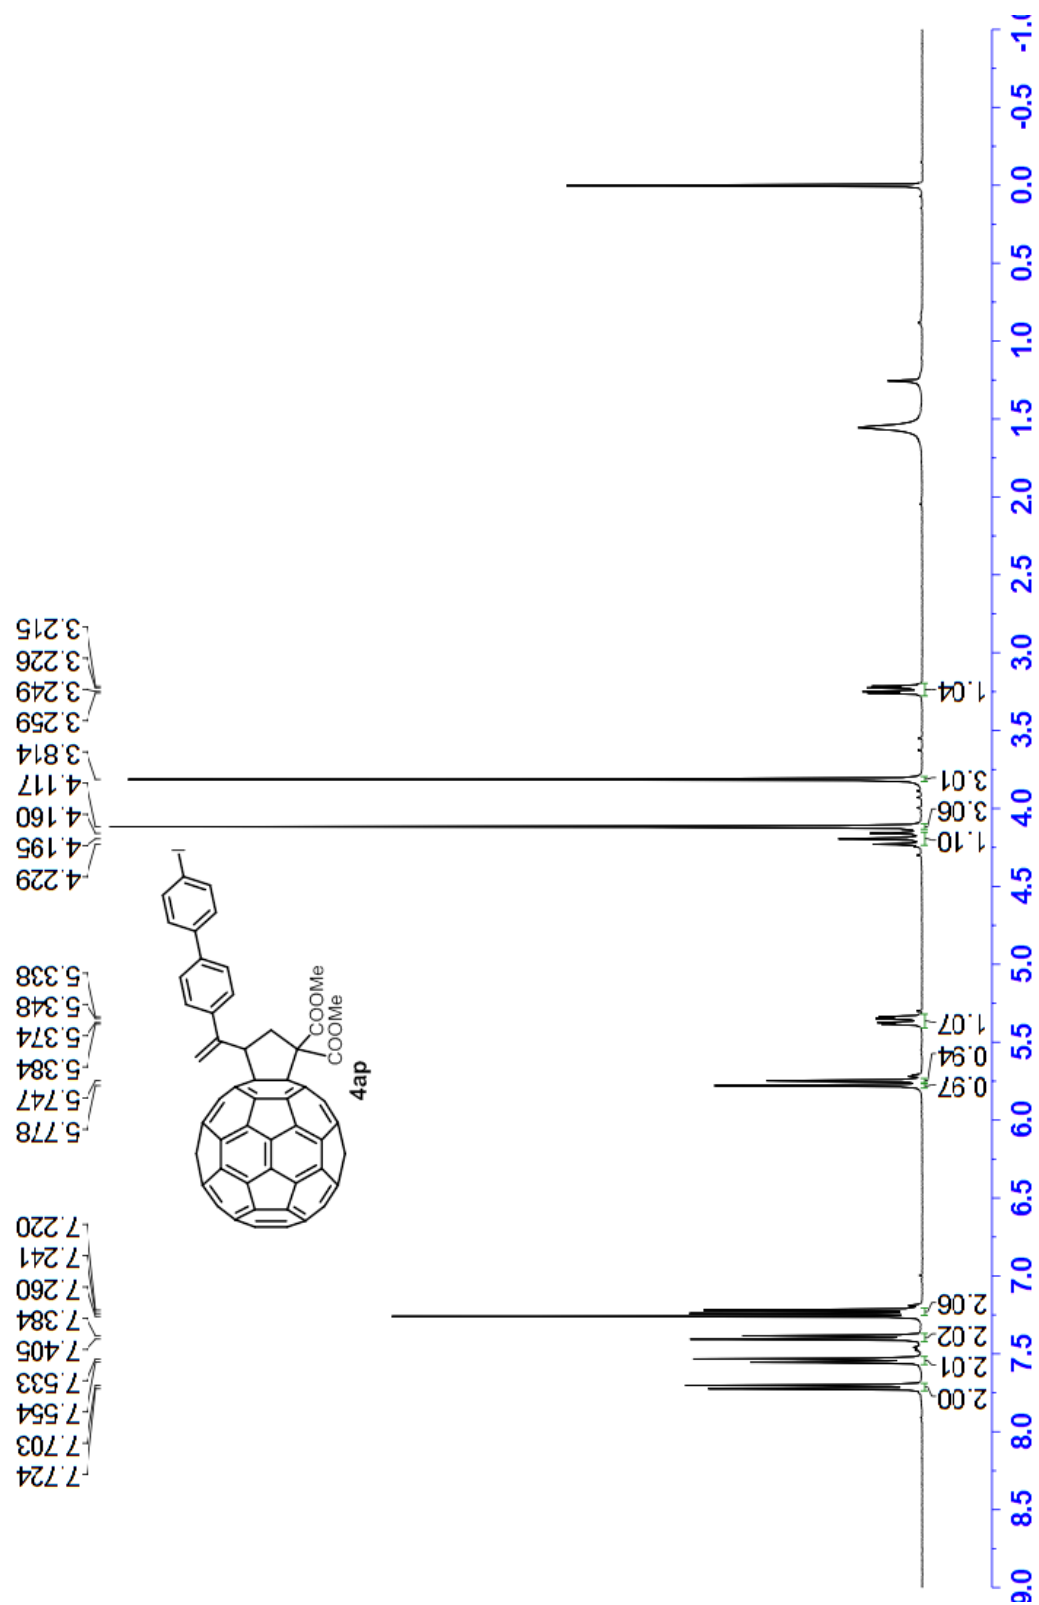



**$^{13}\text{C}$  NMR (150 MHz,  $\text{CDCl}_3$ ) of compound 4ap**

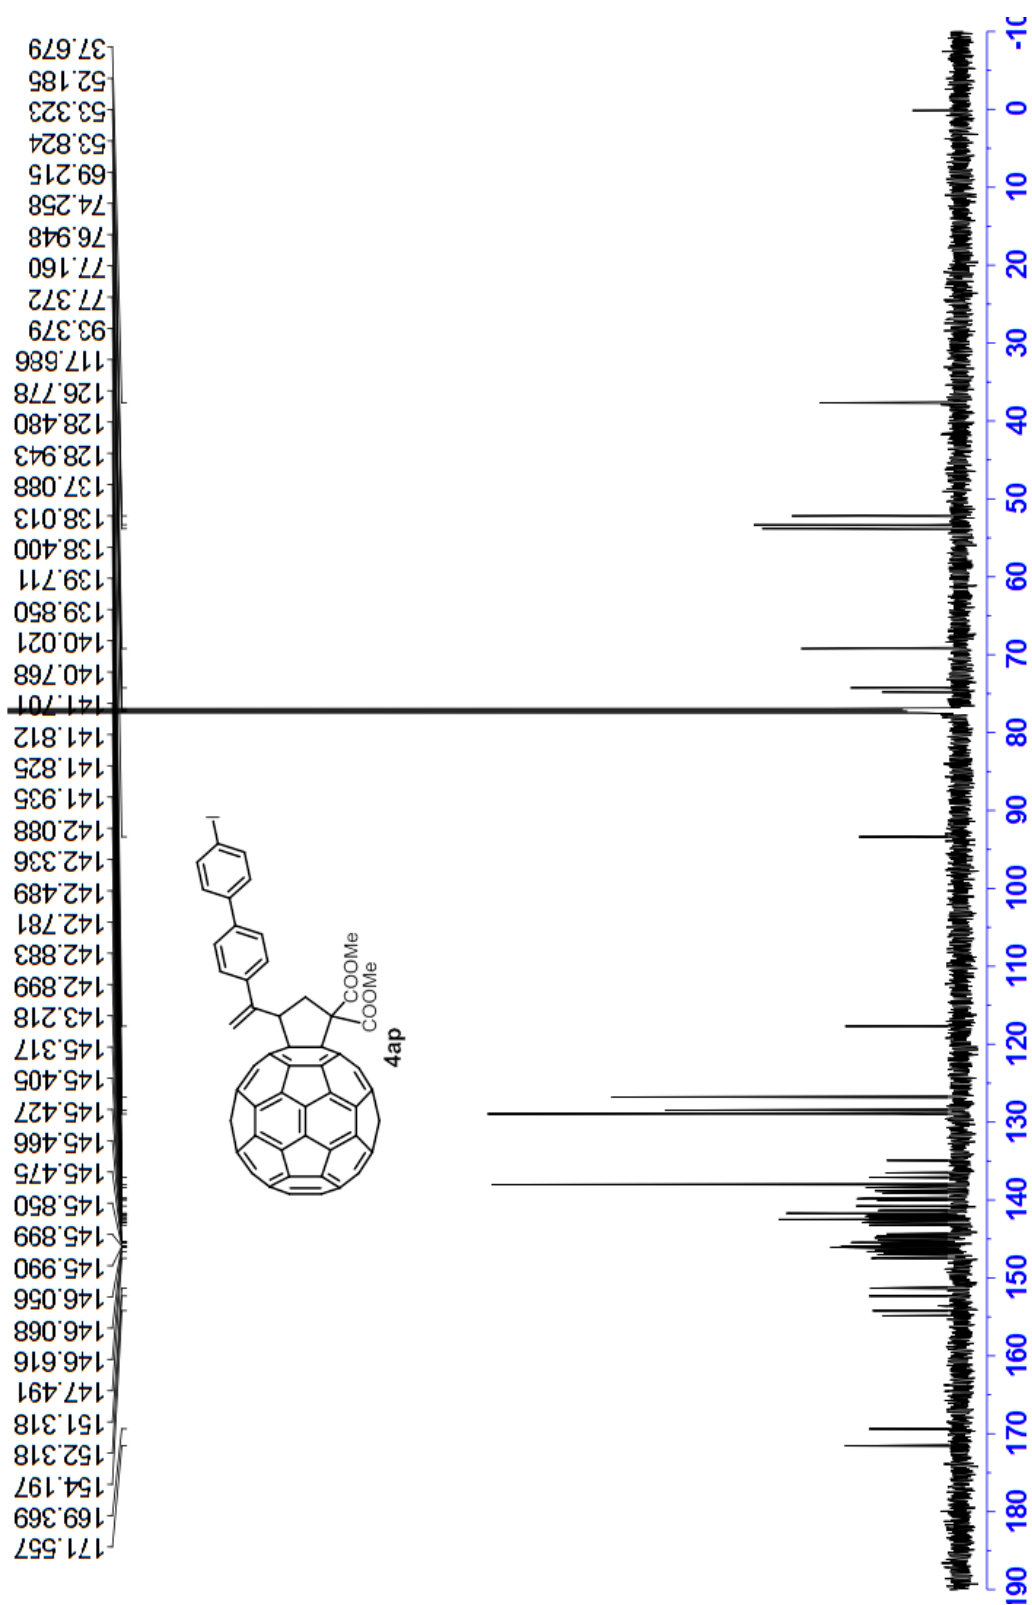

**<sup>1</sup>H NMR (400 MHz, CDCl<sub>3</sub>) of compound 4ba**

7.476, 7.471, 7.457, 7.260, 7.218, 7.206, 7.191, 5.715, 5.378, 5.368, 5.342, 5.333, 4.646, 4.637, 4.628, 4.620, 4.602, 4.585, 4.568, 4.550, 4.541, 4.532, 4.523, 4.505, 4.455, 4.438, 4.428, 4.420, 4.411, 4.403, 4.393, 4.375, 4.206, 4.189, 4.172, 4.154, 4.144, 4.137, 4.127, 4.109, 3.237, 3.227, 3.204, 3.194, 1.522, 1.504, 1.487, 1.240, 1.222, 1.205

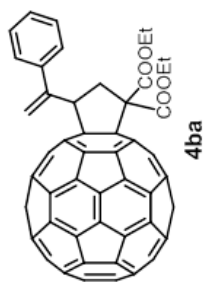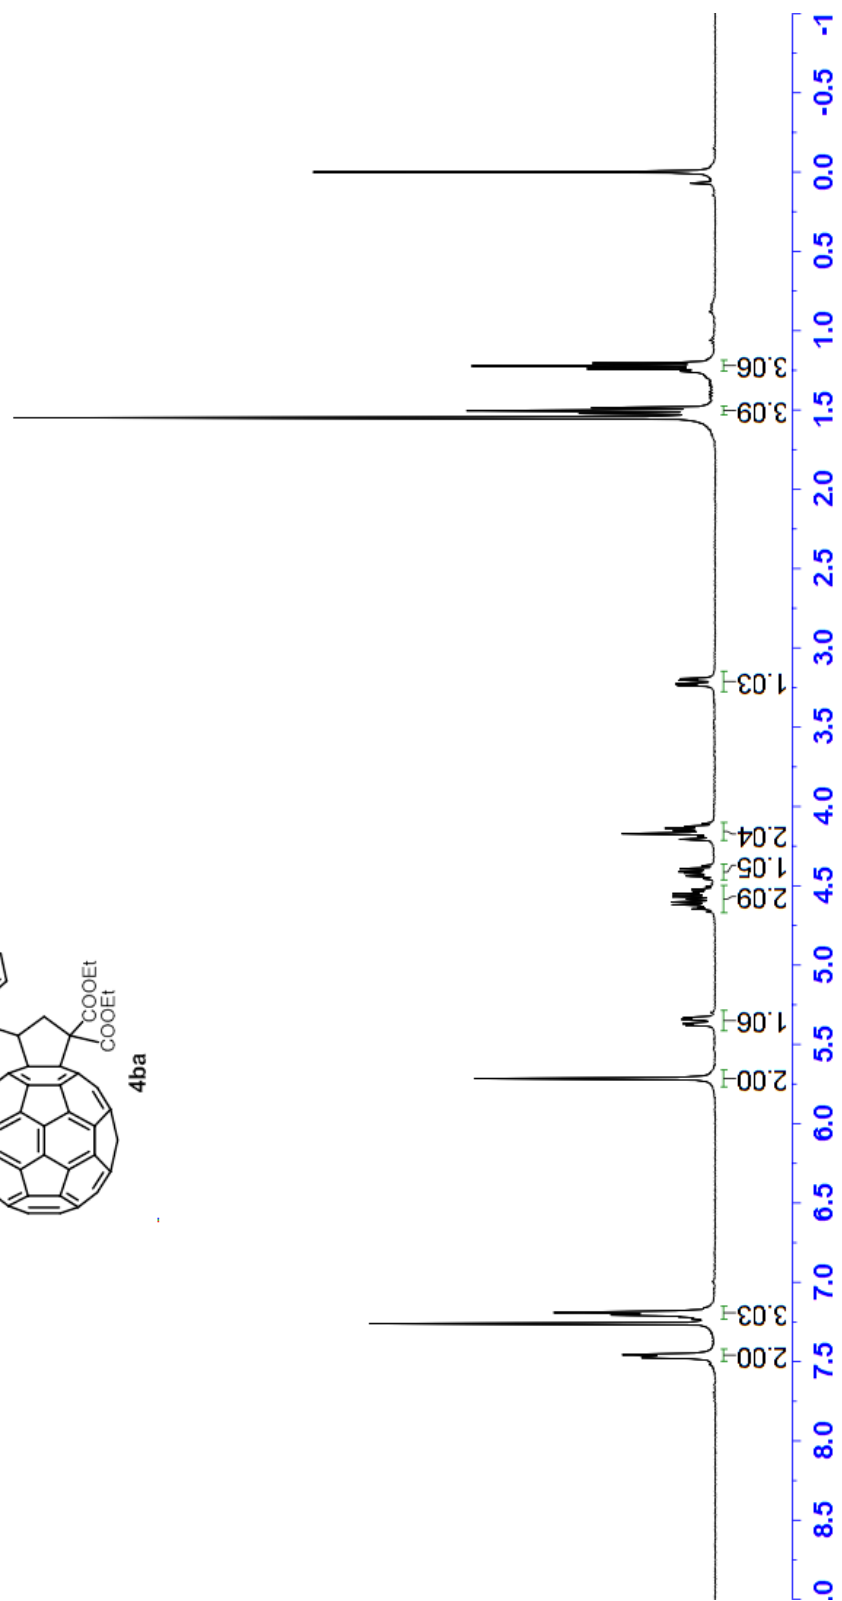

**$^{13}\text{C}$  NMR (150 MHz,  $\text{CDCl}_3$ ) of compound 4ba**

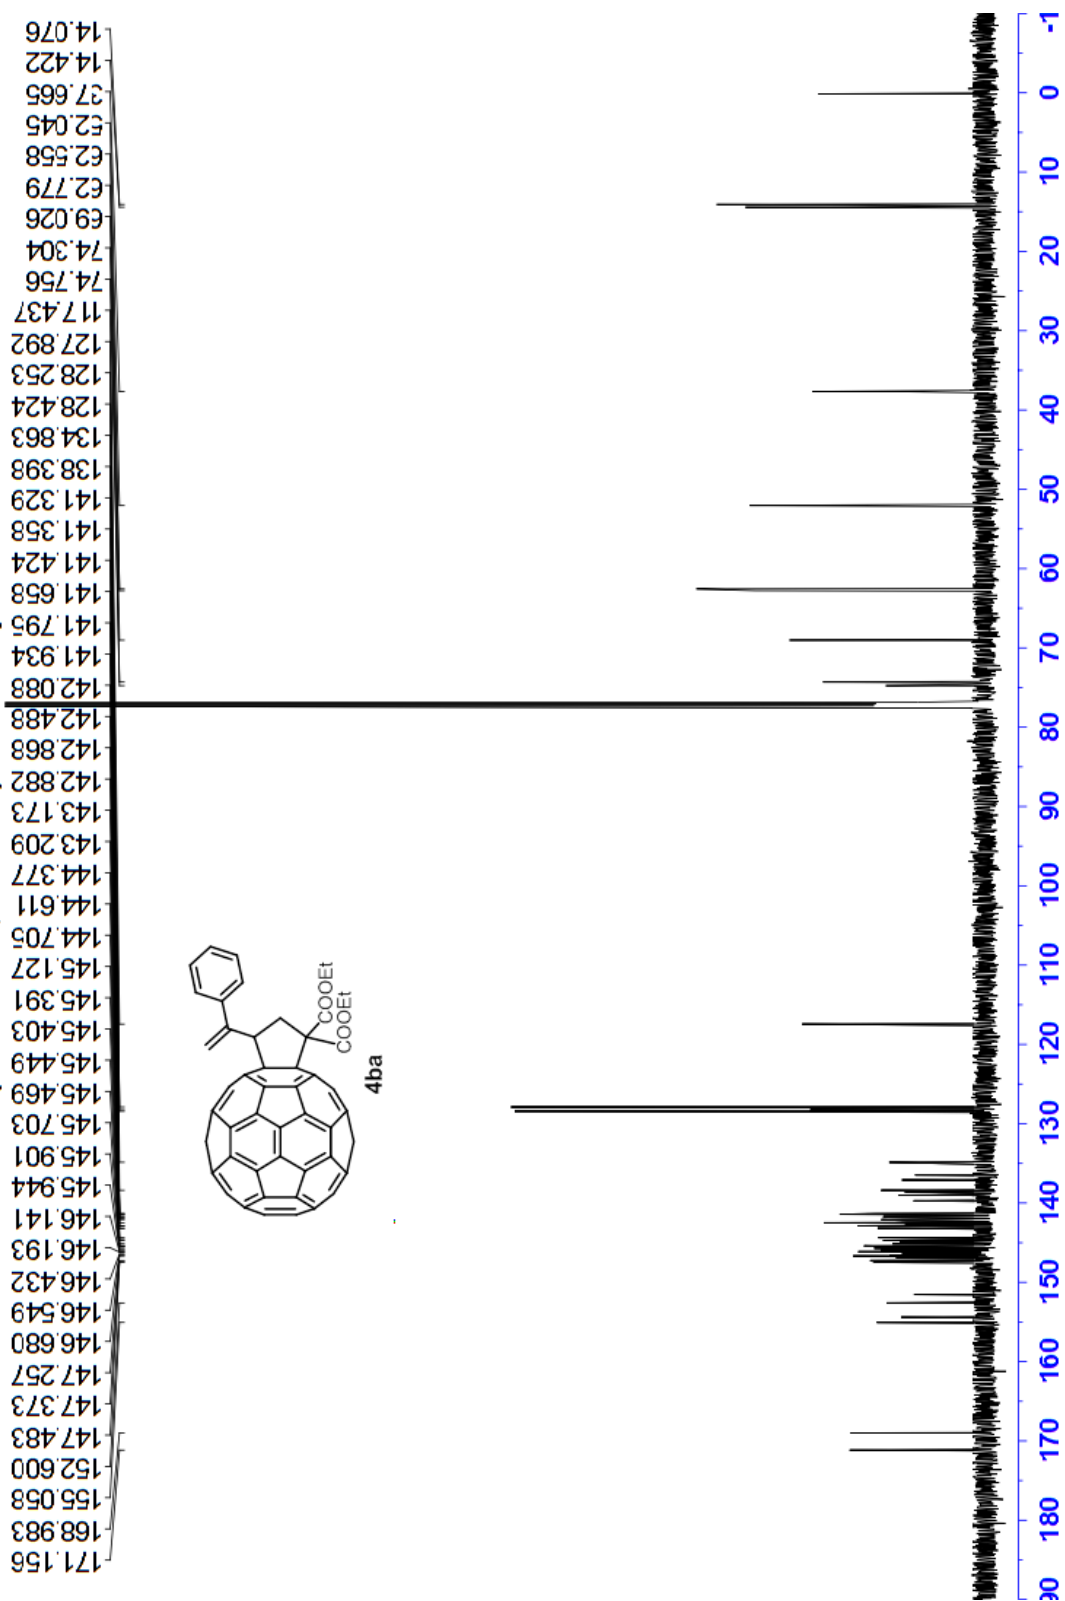

<sup>1</sup>H NMR (600 MHz, DMSO-*d*<sub>6</sub>/CS<sub>2</sub>) of compound 6

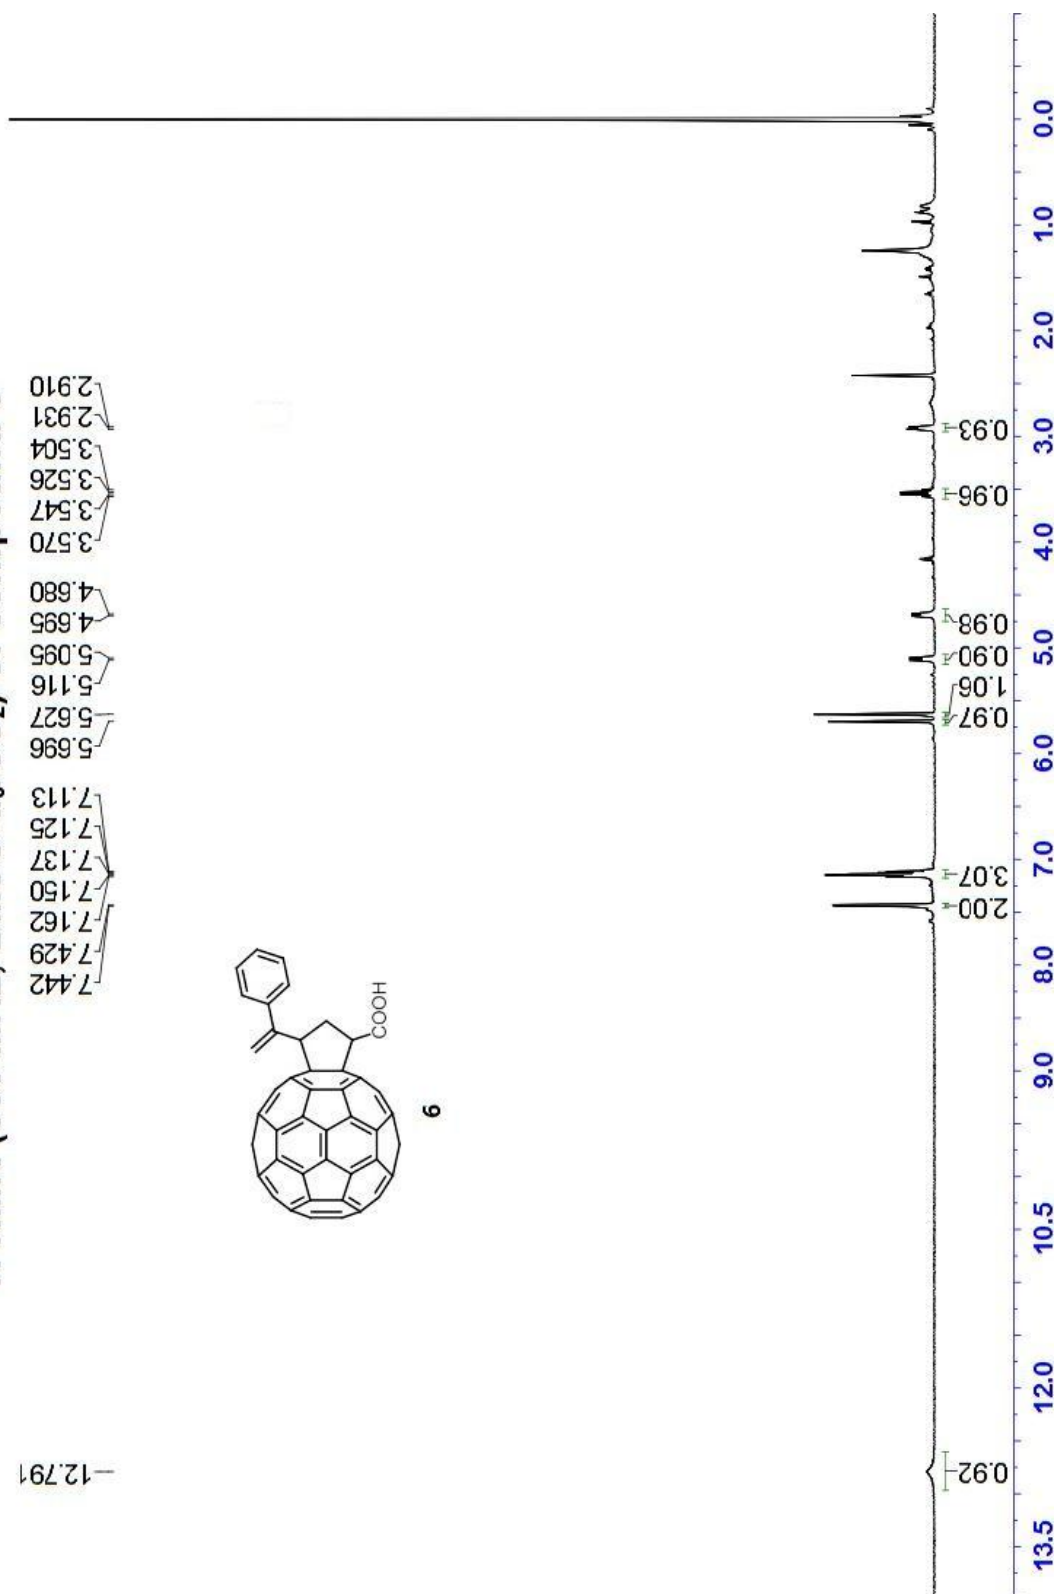

**$^{13}\text{C}$  NMR (150 MHz,  $\text{DMSO-}d_6/\text{CS}_2$ ) of compound 6**

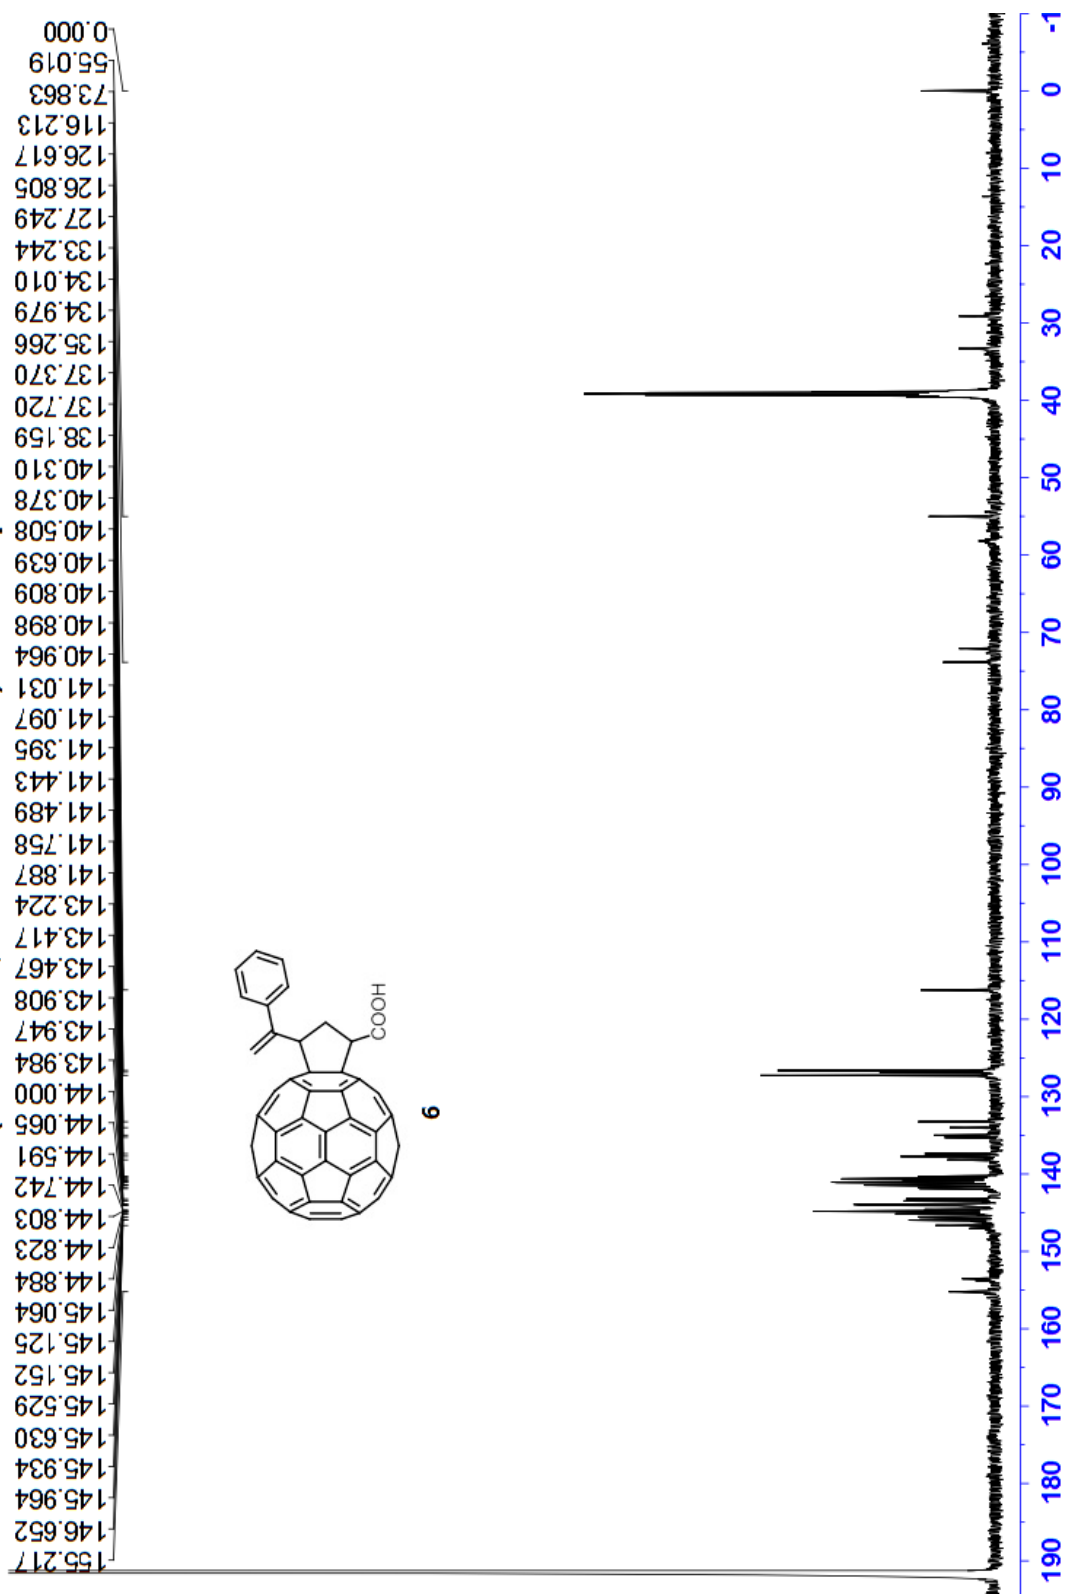

Supplement: Supplementary file 1 [file 20227518]
